# Supplementary material for: Spinal Cord Metabolic Signatures in Models of Fast- and Slow-Progressing SOD1G93A Amyotrophic Lateral Sclerosis
Source: Front Neurosci. 2019 Dec 10;13:1276. doi: 10.3389/fnins.2019.01276 (PMC6914819; doi:10.3389/fnins.2019.01276)
Supplement: FILE S2 — Results of two-group comparisons (Student’s t-test) between NTG and G93A mice for each mouse background and disease stage. [file Data_Sheet_2.XLSX]

## Sheet: Lumbar Spinal Cord
	metabolite	C75 - Presymptomatic			C57 - Onset			C57 - Late Stage			129S - Presymptomatic			129S - Onset			129S - Late Stage
		FC	p-value	pFDR	FC	p-value	pFDR	FC	p-value	pFDR	FC	p-value	pFDR	FC	p-value	pFDR	FC	p-value	pFDR
1	lactate	1.04821	0.68801	0.870795	1.16965	0.254515	0.54867	0.954363	0.429072	0.725336	1.01342	0.841121	0.941903	1.10587	0.559757	0.811077	1.13846	0.409352	0.647344
2	norvaline	0.703883	0.263639	0.870795	0.689594	0.0734158	0.337396	1.05656	0.625633	0.839748	0.930974	0.588717	0.881343	1.07557	0.828262	0.943532	1.24109	0.288603	0.544102
3	oxalic acid	0.88138	0.360148	0.870795	0.877957	0.423605	0.682017	1.23413	0.294727	0.542747	0.764184	0.151672	0.73632	0.929295	0.793265	0.943532	0.889548	0.567834	0.695266
4	norleucine	0.85638	0.12615	0.63976	1.12265	0.222917	0.52757	1.09038	0.256235	0.505352	0.883352	0.208341	0.73632	1.22047	0.0903344	0.591968	0.923665	0.424998	0.653202
5	isoleucine	0.612995	0.0904521	0.63976	0.923012	0.752293	0.873215	0.822241	0.330457	0.572254	0.776931	0.228732	0.73632	1.19736	0.475605	0.803999	1.15704	0.498519	0.667828
6	valine	0.967267	0.73609	0.885804	1.12758	0.398319	0.673348	0.951152	0.550346	0.838913	0.984443	0.859605	0.941903	1.02038	0.877679	0.94417	1.01298	0.897775	0.923797
7	urea	1.16664	0.0303808	0.562108	1.34314	0.0492144	0.302042	0.922146	0.105145	0.34632	0.978863	0.66829	0.90985	1.04405	0.693507	0.911834	1.06525	0.642974	0.736309
8	glycine	0.961465	0.699089	0.870795	0.923099	0.264693	0.552741	0.895291	0.130811	0.357215	0.992312	0.91537	0.941903	0.975698	0.850249	0.943532	0.889308	0.487248	0.66528
9	succinate	0.995259	0.951414	0.967834	0.89276	0.464761	0.682017	0.848616	0.10731	0.34632	0.951231	0.606441	0.881343	1.26002	0.116726	0.591968	1.01156	0.929285	0.942561
10	glyceric acid	0.958409	0.805283	0.946975	1.33397	0.196689	0.481548	2.04298	0.0137821	0.0978527	0.906686	0.0301965	0.73632	0.938331	0.640732	0.874846	0.931445	0.410289	0.647344
11	porphyrin	1.15571	0.510175	0.870795	1.25382	0.544169	0.757569	1.33902	0.0607355	0.25366	1.01835	0.899721	0.941903	0.97637	0.927133	0.961983	1.05639	0.843201	0.921035
12	uracil	0.913661	0.319453	0.870795	0.817316	0.0540306	0.302042	1.02638	0.711571	0.894971	1.00806	0.885025	0.941903	1.179	0.261337	0.742196	0.9003	0.478495	0.66528
13	fumarate	1.163	0.093449	0.63976	1.00231	0.986001	0.986001	0.655127	0.00243041	0.085279	1.06981	0.49954	0.881343	1.07033	0.592056	0.824234	1.09522	0.440898	0.653202
14	threonine	0.872453	0.440562	0.870795	0.904348	0.461994	0.682017	0.954419	0.590784	0.838913	0.867626	0.188012	0.73632	1.21238	0.251375	0.742196	1.29788	0.186392	0.492425
15	thymine	1.03055	0.838171	0.959841	0.729439	0.111562	0.390965	0.98388	0.802821	0.894971	1.03434	0.591719	0.881343	0.997958	0.989961	0.989961	1.24152	0.122981	0.379637
16	6-hydroxyhexanoic acid	0.572795	0.120378	0.63976	1.17689	0.663436	0.812137	1.00956	0.968621	0.968621	0.769305	0.171746	0.73632	0.78481	0.473505	0.803999	1.05433	0.832061	0.921035
17	Beta-alanine	0.897263	0.711477	0.870946	1.03816	0.878997	0.917776	0.712355	0.0297269	0.162355	0.981506	0.893439	0.941903	0.943388	0.839908	0.943532	0.671732	0.0475595	0.325767
18	trans-3-hydroxy-proline	0.802453	0.473463	0.870795	0.988412	0.945355	0.95886	1.01941	0.942633	0.956099	0.93299	0.797114	0.941903	0.795302	0.456555	0.803999	1.21751	0.408172	0.647344
19	1-methylnicotinamide	0.688782	0.031668	0.562108	0.696436	0.322767	0.60273	1.19493	0.580129	0.838913	1.03906	0.810634	0.941903	0.95084	0.850507	0.943532	0.9992	0.994709	0.994709
20	malate	0.955566	0.598209	0.870795	0.894286	0.181436	0.47867	0.801818	0.00929118	0.0954622	1.03978	0.565965	0.881343	1.12487	0.337136	0.772151	1.03921	0.600788	0.722983
21	pyroglutamate	1.00062	0.989866	0.989866	1.02631	0.571383	0.770647	0.948973	0.0873654	0.326471	0.992801	0.874007	0.941903	1.00973	0.933337	0.961983	1.02319	0.879217	0.923797
22	4-guanidinobutyric acid	0.607085	0.166967	0.790311	0.580096	0.331077	0.60273	1.27709	0.533479	0.838913	0.43886	0.134905	0.73632	0.754189	0.533827	0.811077	0.338753	0.288898	0.544102
23	glutamine	0.98196	0.897788	0.965802	1.02798	0.762526	0.873215	1.0214	0.836135	0.899478	0.86534	0.0305425	0.73632	1.13073	0.416562	0.803999	1.27302	0.0879181	0.3619
24	phenylalanine	1.0243	0.892943	0.965802	0.869128	0.28028	0.567053	0.984376	0.894779	0.920715	1.02871	0.663806	0.90985	1.19797	0.298813	0.744083	1.45624	0.00746596	0.106713
25	creatinine	0.982311	0.942665	0.967834	1.29752	0.391418	0.673348	1.06309	0.759607	0.894971	1.01843	0.938067	0.951468	0.86607	0.520127	0.811077	1.23113	0.292877	0.544102
26	alpha-ketoglutarate	0.906517	0.39776	0.870795	0.830499	0.0201656	0.219547	0.766284	0.0253595	0.150044	0.944518	0.51566	0.881343	1.18325	0.151588	0.597931	1.0962	0.284422	0.544102
27	phosphoenolpyruvic acid	0.805829	0.435891	0.870795	1.13995	0.464672	0.682017	0.712323	0.28913	0.542747	1.50292	0.126305	0.73632	2.72777	0.07994	0.591968	1.44691	0.0977773	0.3619
28	3-hydroxy-3-methylglutaric acid	0.914831	0.600933	0.870795	0.726277	0.0158285	0.219547	0.719866	0.0129817	0.0978527	0.935202	0.416123	0.881343	0.903788	0.549435	0.811077	0.639779	0.0223774	0.176533
29	N-acetyl-aspartic acid	0.972289	0.665784	0.870795	0.815944	0.00121542	0.0549684	0.745615	0.00480445	0.085279	0.928853	0.0497151	0.73632	0.898727	0.452765	0.803999	0.745121	0.0678906	0.3619
30	asparagine	0.803643	0.550136	0.870795	0.648905	0.140915	0.421531	0.822767	0.493882	0.796946	0.953736	0.853603	0.941903	0.941617	0.865872	0.94417	0.554432	0.014874	0.134525
31	N-methyl-glutamic acid	0.899993	0.282034	0.870795	0.910501	0.604303	0.794547	0.698267	0.124777	0.354366	0.977222	0.866204	0.941903	0.60174	0.103689	0.591968	0.450116	0.0151577	0.134525
32	glycerol 2-phosphate	0.994812	0.954203	0.967834	0.937919	0.660145	0.812137	0.739443	0.00871641	0.0954622	0.961032	0.40844	0.881343	1.0836	0.447557	0.803999	1.09804	0.543516	0.695266
33	putrescine	0.855341	0.124864	0.63976	0.981468	0.875095	0.917776	0.804448	0.177105	0.433603	0.880375	0.425665	0.881343	1.10063	0.539139	0.811077	1.82408	0.113315	0.365698
34	trans-aconitic acid	0.846789	0.298698	0.870795	0.816071	0.182029	0.47867	0.825471	0.0585435	0.25366	0.931132	0.552109	0.881343	1.24252	0.145679	0.597931	1.38546	0.00346436	0.0876127
35	glycerol 1-phosphate	1.04761	0.210304	0.870795	1.06189	0.620965	0.801609	0.776697	0.00941176	0.0954622	1.00517	0.910044	0.941903	1.00682	0.954541	0.968177	0.976578	0.866425	0.923797
36	O-phosphoethanolamine	1.06494	0.543258	0.870795	1.27852	0.0279067	0.247672	1.32485	0.000859703	0.0610389	0.922404	0.192848	0.73632	1.08628	0.326371	0.772151	1.20887	0.198294	0.492425
37	N-acetyl-glutamic acid	0.947885	0.56695	0.870795	0.820238	0.00154841	0.0549684	0.724934	0.0119282	0.0978527	0.946366	0.248534	0.73632	0.975052	0.838438	0.943532	0.777757	0.100383	0.3619
38	citrate	0.954446	0.641582	0.870795	0.915652	0.190573	0.481548	0.979367	0.782507	0.894971	1.0742	0.387893	0.881343	1.25224	0.13095	0.597931	1.30859	0.0838117	0.3619
39	isocitrate	0.945838	0.60112	0.870795	0.907877	0.142489	0.421531	0.982579	0.81934	0.894971	1.06682	0.440203	0.881343	1.25228	0.138649	0.597931	1.30602	0.0902295	0.3619
40	adenine	0.96784	0.445789	0.870795	0.986238	0.83632	0.917776	0.981716	0.746017	0.894971	0.961671	0.137004	0.73632	1.11925	0.303921	0.744083	1.07365	0.475464	0.66528
41	fructose	1.121	0.483429	0.870795	1.25472	0.254596	0.54867	1.24069	0.161191	0.408735	1.06539	0.766833	0.941903	1.14184	0.518039	0.811077	1.73723	0.134541	0.398016
42	dehydroascorbic acid	1.03094	0.813598	0.946975	1.01055	0.904347	0.93056	0.870458	0.241899	0.505352	0.926819	0.680933	0.90985	1.18839	0.0754242	0.591968	1.32116	0.107041	0.3619
43	tyrosine	0.81109	0.053474	0.632776	1.32547	0.0782672	0.337396	1.18994	0.255931	0.505352	1.04608	0.540859	0.881343	1.34304	0.111242	0.591968	1.29652	0.104977	0.3619
44	ascorbic acid	0.581782	0.105149	0.63976	1.03856	0.860118	0.917776	0.929767	0.800417	0.894971	1.28621	0.464671	0.881343	2.08096	0.00639531	0.454067	1.34589	0.289249	0.544102
45	pantothenic acid	0.957565	0.674678	0.870795	0.884447	0.121144	0.390965	0.849425	0.0459557	0.233061	0.971136	0.691999	0.90985	1.04477	0.769123	0.941512	1.12697	0.239	0.544102
46	xanthine	0.789769	0.047478	0.632776	0.942114	0.79724	0.898476	1.54884	0.00408242	0.085279	1.08624	0.437732	0.881343	1.62055	0.027293	0.591968	1.15484	0.27148	0.544102
47	cytidine-5'-monophosphate	1.01332	0.880183	0.965802	1.04713	0.717804	0.863798	0.86322	0.0961104	0.341192	1.05208	0.573852	0.881343	1.20169	0.216313	0.698101	1.26637	0.201131	0.492425
48	myo-inositol	1.02424	0.451513	0.870795	1.15282	0.0741989	0.337396	1.0853	0.298129	0.542747	1.0382	0.612506	0.881343	1.06013	0.51879	0.811077	1.22295	0.192341	0.492425
49	ribose-5-phosphate	0.821106	0.112243	0.63976	0.785677	0.28752	0.567053	1.26473	0.253373	0.505352	1.00454	0.981243	0.981243	1.34143	0.072123	0.591968	0.887903	0.446704	0.653202
50	ribulose-5-phosphate	0.919625	0.482432	0.870795	1.04069	0.855879	0.917776	0.93996	0.676843	0.873743	1.13234	0.361734	0.881343	1.30389	0.294349	0.744083	1.60521	0.0093363	0.11048
51	norepinephrine	1.05371	0.632151	0.870795	1.05129	0.500925	0.711314	0.835073	0.0187249	0.120861	0.844435	0.0568635	0.73632	0.917706	0.409349	0.803999	1.09582	0.513513	0.675175
52	glutathione	0.896758	0.660349	0.870795	0.791912	0.310091	0.59504	0.965794	0.723658	0.894971	0.891791	0.19209	0.73632	1.02688	0.934885	0.961983	0.838057	0.556343	0.695266
53	tryptophan	0.795258	0.461026	0.870795	1.80107	0.00630234	0.149155	1.12717	0.588653	0.838913	1.0611	0.620664	0.881343	0.864946	0.675856	0.905392	1.33027	0.298873	0.544102
54	5-hydroxyindole-3-acetic acid	0.793494	0.10534	0.63976	0.951815	0.442046	0.682017	0.890901	0.24279	0.505352	0.815909	0.0623344	0.73632	1.044	0.728674	0.91955	1.29855	0.0816233	0.3619
55	inosine	0.601741	0.00838246	0.297577	0.546161	0.0833084	0.337396	1.42805	0.11887	0.354366	0.808008	0.248393	0.73632	1.56447	0.108805	0.591968	0.695677	0.0658517	0.3619
56	adenosine	0.973395	0.854029	0.962477	0.654646	0.255016	0.54867	0.719882	0.156672	0.408735	1.40199	0.152472	0.73632	1.48386	0.174004	0.622363	0.916437	0.670861	0.75605
57	guanosine	0.784977	0.279845	0.870795	0.602377	0.113003	0.390965	0.88246	0.573038	0.838913	0.974846	0.872068	0.941903	2.02231	0.0271806	0.591968	0.895849	0.567964	0.695266
58	5'-Deoxy-5'-(methylthio)adenosine	0.932487	0.528895	0.870795	1.04202	0.171162	0.47867	0.870322	0.197663	0.467803	0.882525	0.20494	0.73632	1.2585	0.072041	0.591968	1.33704	0.0504709	0.325767
59	uridine 5'-monophosphate	1.11736	0.517752	0.870795	0.929532	0.633964	0.803775	1.09931	0.629021	0.839748	1.15686	0.322368	0.881343	1.39274	0.184079	0.622363	1.37974	0.179001	0.492425
60	inosine 5'-monophosphate	0.789943	0.227516	0.870795	0.606007	0.017598	0.219547	0.892001	0.638681	0.839748	0.770142	0.0458612	0.73632	0.871814	0.471386	0.803999	0.514376	0.00751502	0.106713
61	adenosine 5'-monophosphate	0.992746	0.950126	0.967834	0.645095	0.0216455	0.219547	0.84356	0.229383	0.505352	0.875	0.248897	0.73632	1.1607	0.390944	0.803999	0.881948	0.37047	0.63301
62	guanosine 5'-monophosphate	0.875788	0.510982	0.870795	0.684093	0.0339791	0.254297	0.7572	0.120872	0.354366	0.823198	0.24569	0.73632	1.23727	0.303271	0.744083	0.83167	0.258422	0.544102
63	cholesterol	0.934664	0.67706	0.870795	0.903245	0.575272	0.770647	0.921377	0.795414	0.894971	1.29657	0.19307	0.73632	1.37138	0.247984	0.742196	0.591747	0.283071	0.544102
64	alanine	0.941501	0.549021	0.870795	0.930392	0.470688	0.682017	0.966254	0.611271	0.839748	0.949289	0.519051	0.881343	1.26422	0.0589972	0.591968	0.956215	0.636109	0.736309
65	leucine	1.15809	0.51699	0.870795	1.31551	0.348844	0.619198	0.974476	0.813834	0.894971	0.890968	0.408104	0.881343	1.17556	0.577286	0.819747	0.883681	0.635743	0.736309
66	methionine	0.960215	0.558731	0.870795	1.04969	0.737737	0.872989	0.989353	0.866319	0.904539	0.901423	0.376	0.881343	1.07815	0.452803	0.803999	0.989922	0.889422	0.923797
67	aspartic acid	0.890484	0.307344	0.870795	0.939424	0.450443	0.682017	0.961347	0.323484	0.572254	0.955575	0.530501	0.881343	0.934413	0.71311	0.91955	0.809632	0.329374	0.584638
68	glutamate	1.05043	0.541682	0.870795	1.16246	0.118095	0.390965	0.914422	0.0778446	0.307054	1.02752	0.734211	0.941903	0.876612	0.38369	0.803999	0.888483	0.450801	0.653202
69	dihydroxyacetone phosphate	1.12952	0.474639	0.870795	1.89091	0.0358165	0.254297	1.01878	0.859843	0.904539	1.19792	0.430792	0.881343	1.07917	0.73823	0.91955	2.13611	0.00370195	0.0876127
70	hypoxanthine	0.731312	0.00685071	0.297577	0.655306	0.0855369	0.337396	1.44299	0.0514206	0.243391	0.820362	0.142116	0.73632	1.47804	0.11198	0.591968	0.854435	0.374456	0.63301
71	3-phosphoglycerate	0.794584	0.21745	0.870795	1.36959	0.0553035	0.302042	1.11891	0.488488	0.796946	0.924794	0.617925	0.881343	1.43861	0.183111	0.622363	1.65271	0.00108486	0.0770251

## Sheet: Thoracic Spinal Cord
	metabolite	C75 - Presymptomatic			C57 - Onset			C57 - Late Stage			129S - Presymptomatic			129S - Onset			129S - Late Stage
		FC	p-value	pFDR	FC	p-value	pFDR	FC	p-value	pFDR	FC	p-value	pFDR	FC	p-value	pFDR	FC	p-value	pFDR
1	lactate	0.698986	0.101876	0.347576	0.767054	0.250794	0.601731	1.53051	0.00556365	0.100506	0.873568	0.417629	0.706318	1.13628	0.527181	0.710779	1.3537	0.110431	0.295191
2	alanine	0.639621	0.0352059	0.244515	1.03341	0.853733	0.980265	1.14877	0.174386	0.478949	1.07687	0.527047	0.727826	1.29648	0.102069	0.305152	0.981198	0.914402	0.930445
3	isoleucine	0.71156	0.168645	0.376209	1.01636	0.887525	0.980265	1.1677	0.143037	0.478949	1.14637	0.197467	0.543674	1.43547	0.0171993	0.11084	1.02765	0.791957	0.860685
4	but-2-yne-1,4-diol	0.962802	0.91799	0.934095	1.08157	0.870254	0.980265	1.14524	0.738729	0.823967	0.824035	0.479428	0.727826	0.99724	0.993704	0.993704	1.15612	0.674142	0.797964
5	urea	0.85237	0.383541	0.54257	1.01083	0.957078	0.9915	1.13621	0.23954	0.514567	1.07542	0.681264	0.790266	1.16129	0.207143	0.430968	0.971727	0.865143	0.896041
6	threonine	0.874279	0.803483	0.832179	0.795959	0.575048	0.829789	1.12057	0.707099	0.823967	0.863021	0.628221	0.779008	0.810466	0.589848	0.760249	1.11526	0.708188	0.821498
7	glycine	0.808781	0.520245	0.685778	0.674633	0.0850718	0.442468	0.919198	0.651239	0.821128	0.898694	0.592847	0.764114	0.831211	0.411796	0.657233	0.899855	0.650826	0.786415
8	succinate	0.805576	0.0393768	0.244515	0.844952	0.273731	0.610632	1.08071	0.546572	0.750185	1.09062	0.473852	0.727826	1.30428	0.0227127	0.119758	0.867404	0.166697	0.333394
9	glyceric acid	0.931401	0.599832	0.745487	1.41767	0.0237904	0.434646	1.04154	0.716112	0.823967	1.114	0.0792007	0.382803	0.942174	0.419269	0.657233	0.86386	0.052176	0.236071
10	porphyrin	0.958195	0.697188	0.816505	1.06648	0.586575	0.829789	1.26784	0.032532	0.210735	1.07209	0.49151	0.727826	1.21422	0.208436	0.430968	1.07651	0.407074	0.654618
11	uracil	0.75349	0.0118726	0.137722	0.813305	0.103281	0.442468	1.01951	0.831773	0.891222	1.03944	0.377323	0.683897	1.10567	0.272645	0.494169	0.826171	0.115774	0.295191
12	fumarate	0.980907	0.796329	0.832179	0.936776	0.568119	0.829789	0.834736	0.249117	0.516029	1.22314	0.0430655	0.312225	1.16451	0.0924702	0.29796	0.940548	0.517103	0.681636
13	methionine	0.787217	0.683821	0.816505	0.782701	0.365259	0.697885	1.21451	0.166164	0.478949	1.08034	0.64726	0.779008	0.870157	0.618515	0.777663	1.39661	0.455266	0.654618
14	aspartic acid	0.782778	0.0837176	0.340902	0.92174	0.462922	0.727333	0.840139	0.261077	0.521819	1.11679	0.296409	0.593983	0.899233	0.347446	0.610663	0.583734	0.000330751	0.00959179
15	Beta-alanine	0.740731	0.203272	0.380314	1.05887	0.895759	0.980265	1.72462	0.191207	0.478949	1.13319	0.509895	0.727826	2.10602	0.124351	0.314989	0.940038	0.830275	0.875563
16	homoserine	0.937621	0.56704	0.730851	1.14283	0.246348	0.601731	12.3555	0.364499	0.590437	1.02573	0.699051	0.795	38.7833	0.180116	0.417286	1.1183	0.359202	0.612756
17	decanoic acid	0.94214	0.604101	0.745487	1.04841	0.539161	0.822929	1.02494	0.732608	0.823967	1.23095	0.00586107	0.113314	1.03949	0.482921	0.700235	0.98199	0.739993	0.84156
18	malate	0.78195	0.0217949	0.210684	0.971172	0.803574	0.980265	0.927274	0.523249	0.740205	1.27488	0.0110065	0.159594	1.23174	0.0125698	0.10415	0.998418	0.986494	0.986494
19	1-methylnicotinamide	0.591916	0.127002	0.347913	0.665597	0.404204	0.727333	1.42386	0.164198	0.478949	1.03586	0.808569	0.838525	0.995571	0.985092	0.993704	1.50384	0.443315	0.654618
20	threitol	0.840668	0.0320971	0.244515	0.758424	0.20654	0.570444	1.05163	0.493566	0.715671	1.11876	0.023257	0.224817	1.11953	0.251287	0.485821	1.05898	0.531007	0.684409
21	glutamate	0.893244	0.152506	0.353814	0.924238	0.32964	0.659279	0.988403	0.86049	0.891222	1.06676	0.142382	0.543674	0.974749	0.723933	0.855965	0.926612	0.134727	0.295191
22	pyroglutamate	0.901898	0.145835	0.352434	0.926541	0.318693	0.659279	0.988239	0.855549	0.891222	1.06276	0.158845	0.543674	0.976203	0.7379	0.855965	0.930772	0.134676	0.295191
23	cytosine	0.819497	0.404071	0.558003	0.9598	0.846717	0.980265	1.19826	0.0750796	0.394383	0.908058	0.193549	0.543674	0.873058	0.463123	0.688747	1.32411	0.0889038	0.295191
24	phenylalanine	0.88632	0.332329	0.494233	1.00659	0.949008	0.9915	0.993052	0.954835	0.954835	1.05878	0.640148	0.779008	1.36986	0.187059	0.417286	1.09178	0.453958	0.654618
25	phosphoenolpyruvic acid	0.746018	0.137966	0.347913	1.00209	0.991262	0.9915	1.06984	0.69118	0.823967	1.42311	0.123583	0.522291	1.08753	0.630175	0.777663	1.43046	0.105298	0.295191
26	3-hydroxy-3-methylglutaric acid	0.724929	0.00409414	0.11873	0.548335	5.93836e-05	0.00344425	0.668851	0.0327003	0.210735	1.16052	0.0223026	0.224817	0.917561	0.215484	0.430968	0.632343	0.000305842	0.00959179
27	N-acetyl-aspartic acid	0.760512	0.0421578	0.244515	0.697153	0.0288217	0.434646	0.763089	0.108544	0.419702	1.07962	0.276161	0.593235	0.883073	0.136513	0.329906	0.655853	0.00255177	0.0370006
28	N-methyl-glutamic acid	0.689147	0.225703	0.39651	0.826227	0.443463	0.727333	0.977075	0.910762	0.92674	1.34081	0.0675293	0.382803	0.688858	0.121307	0.314989	0.802	0.473247	0.654618
29	glycerol 2-phosphate	0.97432	0.771819	0.828991	0.875002	0.0798194	0.442468	0.906189	0.419923	0.624501	1.15779	0.183406	0.543674	1.2021	0.0361985	0.161501	0.820872	0.0500586	0.236071
30	trans-aconitic acid	0.661625	0.232437	0.39651	0.96518	0.888708	0.980265	0.895136	0.370534	0.590437	1.352	0.205491	0.543674	0.921345	0.71708	0.855965	1.1861	0.648085	0.786415
31	glycerol 1-phosphate	0.762694	0.136003	0.347913	0.807149	0.17284	0.501235	0.876753	0.390433	0.595924	1.04102	0.658127	0.779008	0.944011	0.529442	0.710779	0.796879	0.110401	0.295191
32	O-phosphoethanolamine	0.823381	0.377541	0.54257	1.23721	0.139226	0.448617	1.70794	0.00140097	0.0812563	1.10468	0.243716	0.543674	1.01919	0.893454	0.959635	1.25727	0.236331	0.428351
33	N-acetyl-glutamic acid	0.712744	0.191729	0.380314	0.818983	0.239145	0.601731	0.821557	0.206443	0.478949	1.02096	0.80961	0.838525	0.911177	0.41845	0.657233	0.729208	0.0212402	0.205322
34	hypoxanthine	0.277713	0.316525	0.483117	0.597427	0.665569	0.91743	2.56774	0.0189394	0.183081	1.06594	0.862443	0.862443	1.37488	0.539212	0.710779	2.21387	0.435942	0.654618
35	3-phosphoglycerate	0.821898	0.126596	0.347913	1.33016	0.0907495	0.442468	1.12868	0.376658	0.590437	1.25034	0.12607	0.522291	1.66651	0.00375514	0.0725995	1.84445	0.0180458	0.205322
36	citrate	0.809423	0.0765396	0.340902	1.20986	0.123819	0.442468	1.16949	0.201264	0.478949	1.32466	0.00188657	0.0970617	1.40999	0.00716416	0.0831042	1.47911	0.0529124	0.236071
37	isocitrate	0.815883	0.0761486	0.340902	1.21409	0.11951	0.442468	1.17178	0.188234	0.478949	1.29798	0.00334695	0.0970617	1.40484	0.00642352	0.0831042	1.46797	0.0524199	0.236071
38	dehydroascorbic acid	0.698131	0.1359	0.347913	0.978849	0.885839	0.980265	2.25493	0.00950568	0.110266	1.14489	0.23152	0.543674	1.15815	0.382107	0.651829	1.06193	0.631999	0.786415
39	fructose	0.868742	0.0884508	0.340902	1.281	0.155607	0.475011	1.24952	0.0419435	0.243272	1.11736	0.296992	0.593983	1.21488	0.264939	0.494169	1.59284	0.103446	0.295191
40	lysine	0.858934	0.279019	0.44953	2.0428	0.124114	0.442468	2.0942	0.165803	0.478949	0.96601	0.861878	0.862443	1.64817	0.0593035	0.219484	2.53462	0.118714	0.295191
41	tyrosine	0.693611	0.129118	0.347913	1.4122	0.0997851	0.442468	1.78738	0.0293836	0.210735	1.18723	0.0737867	0.382803	1.91728	0.0164238	0.11084	1.64455	0.0428981	0.236071
42	ascorbic acid	0.405649	0.197653	0.380314	2.096	0.449408	0.727333	11.3653	0.0815966	0.394383	1.42326	0.426226	0.706318	5.27309	0.0602013	0.219484	3.13064	0.151109	0.313011
43	pantothenic acid	0.746938	0.00621902	0.120234	0.849845	0.0791823	0.442468	0.928626	0.568956	0.750185	1.10272	0.215734	0.543674	0.998459	0.985793	0.993704	0.97412	0.765472	0.853796
44	cytidine-5'-monophosphate	0.898901	0.489805	0.660668	0.865692	0.129689	0.442468	0.888752	0.327844	0.590437	1.10724	0.359456	0.683897	1.12222	0.448893	0.685152	0.910706	0.343261	0.603308
45	palmitic acid	1.16104	0.193206	0.380314	1.00437	0.97827	0.9915	0.929428	0.569106	0.750185	1.07512	0.370728	0.683897	1.21779	0.0324367	0.156777	0.876229	0.0464814	0.236071
46	myo-inositol	0.954488	0.0940421	0.340902	1.09375	0.0354163	0.434646	1.16535	0.00693142	0.100506	1.03429	0.243672	0.543674	1.11856	0.0110559	0.10415	1.19777	0.028339	0.234809
47	ribose-5-phosphate	1.10805	0.296032	0.46405	0.721442	0.0449634	0.434646	0.604122	0.00527677	0.100506	1.22042	0.0779386	0.382803	0.746683	0.00134337	0.0725995	0.714581	0.00226342	0.0370006
48	norepinephrine	0.927675	0.730226	0.828965	0.933328	0.680164	0.91743	1.20194	0.136327	0.478949	1.03094	0.733626	0.802836	0.899234	0.503695	0.710779	1.55202	0.0756715	0.295191
49	5-hydroxyindole-3-acetic acid	0.664028	0.00838878	0.121637	0.863938	0.304011	0.65306	1.03166	0.858001	0.891222	1.15222	0.186643	0.543674	0.989383	0.937539	0.988677	1.13755	0.502893	0.67832
50	oleic acid	1.2989	0.240362	0.398315	1.05569	0.808206	0.980265	0.610368	0.0986432	0.408665	1.03955	0.762349	0.818819	1.33229	0.0035616	0.0725995	0.800715	0.0986353	0.295191
51	stearic acid	1.03474	0.757502	0.828965	0.950947	0.794826	0.980265	0.96804	0.692865	0.823967	0.956911	0.574064	0.756721	1.14547	0.0772963	0.263717	0.905271	0.127159	0.295191
52	glucose 6-phosphate	1.6016	0.18446	0.380314	2.84885	0.0383207	0.434646	2.49036	0.225117	0.502184	1.32399	0.571146	0.756721	1.50659	0.0221192	0.119758	1.92357	0.137417	0.295191
53	inosine	0.287145	0.00375901	0.11873	1.00575	0.9915	0.9915	1.68696	0.0963809	0.408665	1.23481	0.211091	0.543674	1.73055	0.0605472	0.219484	0.662376	0.21861	0.409012
54	adenosine	0.483137	0.0689243	0.340902	0.656281	0.463988	0.727333	1.15703	0.618953	0.797761	1.66834	0.0328506	0.272191	1.62406	0.124909	0.314989	0.944931	0.801327	0.860685
55	sucrose	0.852195	0.232084	0.39651	1.55611	0.259367	0.601731	0.520386	0.362265	0.590437	0.434736	0.425743	0.706318	1.06712	0.852745	0.951139	0.706113	0.136271	0.295191
56	5'-Deoxy-5'-(methylthio)adenosine	0.907354	0.746909	0.828965	1.20891	0.373008	0.697885	1.27336	0.283083	0.529639	0.969036	0.722605	0.802836	1.05016	0.779082	0.886015	1.34056	0.426805	0.654618
57	guanosine	0.901355	0.703884	0.816505	1.48963	0.423756	0.727333	1.49646	0.269906	0.521819	1.20519	0.48641	0.727826	1.048	0.878921	0.959635	0.852932	0.474034	0.654618
58	cholesterol	1.00053	0.999214	0.999214	2.07051	0.105672	0.442468	0.267574	0.353548	0.590437	1.21654	0.516693	0.727826	0.512969	0.105225	0.305152	0.619634	0.18788	0.363234
