# Supplementary material for: Spinal Cord Metabolic Signatures in Models of Fast- and Slow-Progressing SOD1G93A Amyotrophic Lateral Sclerosis
Source: Front Neurosci. 2019 Dec 10;13:1276. doi: 10.3389/fnins.2019.01276 (PMC6914819; doi:10.3389/fnins.2019.01276)
Supplement: FILE S4 — Summary statistics of metabolite measurements for each group. [file Data_Sheet_4.xlsx]

## Sheet: Lumbar Data Summary
	metabolite	Presymptomatic								Onset								Late Stage								Presymptomatic								Onset								Late Stage
		C57-NTG				C57-G93A				C57-NTG				C57-G93A				C57-NTG				C57-G93A				129S-NTG				129S-G93A				129S-NTG				129S-G93A				129S-NTG				129S-G93A
		Mean	Median	S.D.	S.E.M.	Mean	Median	S.D.	S.E.M.	Mean	Median	S.D.	S.E.M.	Mean	Median	S.D.	S.E.M.	Mean	Median	S.D.	S.E.M.	Mean	Median	S.D.	S.E.M.	Mean	Median	S.D.	S.E.M.	Mean	Median	S.D.	S.E.M.	Mean	Median	S.D.	S.E.M.	Mean	Median	S.D.	S.E.M.	Mean	Median	S.D.	S.E.M.	Mean	Median	S.D.	S.E.M.
1	lactate	0.747261	0.737587	0.170631	0.0763086	0.783286	0.734785	0.0856165	0.0382889	0.63945	0.643075	0.0834243	0.0417121	0.747933	0.661972	0.16869	0.0754404	0.693823	0.688877	0.0678392	0.0303386	0.662159	0.635232	0.0506238	0.0226396	0.6051	0.632279	0.0805431	0.03602	0.613222	0.609594	0.0305249	0.0136511	0.713735	0.712574	0.168632	0.0754147	0.7893	0.746411	0.219632	0.0982226	0.634593	0.715267	0.1988	0.0889061	0.722461	0.727194	0.0964467	0.0431323
2	norvaline	0.550748	0.584052	0.248432	0.111102	0.387662	0.495664	0.168532	0.07537	0.631168	0.611807	0.0788507	0.0394253	0.43525	0.439931	0.179676	0.0803534	0.63491	0.663204	0.118326	0.0529169	0.670822	0.723737	0.105013	0.0469633	0.754229	0.686153	0.128278	0.0573678	0.702168	0.630653	0.16151	0.0722292	0.545198	0.597027	0.318346	0.142369	0.586399	0.566759	0.259109	0.115877	0.525079	0.581572	0.214098	0.0957476	0.651672	0.633543	0.116815	0.0522414
3	oxalic acid	0.456445	0.462651	0.0824383	0.0368675	0.402301	0.370261	0.0934451	0.0417899	0.46627	0.472444	0.106718	0.0533589	0.409365	0.383244	0.087407	0.0390896	0.487446	0.507368	0.0926611	0.0414393	0.60157	0.580426	0.200577	0.0897006	0.585134	0.488951	0.172843	0.0772978	0.44715	0.434492	0.0526708	0.0235551	0.455885	0.379038	0.235303	0.10523	0.423652	0.481051	0.116959	0.0523059	0.533447	0.570227	0.193223	0.0864118	0.474527	0.524315	0.101243	0.0452772
4	norleucine	0.655704	0.659086	0.0541877	0.0242335	0.561531	0.599312	0.105409	0.0471403	0.655291	0.677413	0.0612941	0.030647	0.735662	0.737795	0.113948	0.0509591	0.618647	0.615415	0.0742211	0.0331927	0.674559	0.709097	0.0702969	0.0314377	0.783902	0.791071	0.0824165	0.0368578	0.692462	0.729469	0.122398	0.0547379	0.688809	0.653588	0.111786	0.049992	0.84067	0.825153	0.135289	0.0605029	0.754732	0.780263	0.108606	0.0485701	0.69712	0.692129	0.108136	0.0483598
5	isoleucine	0.536619	0.645752	0.203822	0.0911521	0.328944	0.298267	0.10928	0.0488714	0.571861	0.625257	0.171989	0.0859945	0.527835	0.404129	0.230087	0.102898	0.725425	0.745138	0.127015	0.0568028	0.596475	0.673469	0.241173	0.107856	0.730514	0.808415	0.20138	0.0900599	0.567559	0.609164	0.193893	0.0867114	0.54152	0.637133	0.20613	0.0921842	0.648393	0.602613	0.24328	0.108798	0.54741	0.599645	0.183611	0.0821135	0.633374	0.697055	0.199412	0.0891797
6	valine	0.62141	0.594848	0.0703186	0.0314474	0.601069	0.579152	0.10881	0.0486615	0.576194	0.591761	0.0797867	0.0398933	0.649703	0.569749	0.157601	0.0704812	0.649964	0.671131	0.0800118	0.0357824	0.618215	0.638649	0.0810231	0.0362347	0.661865	0.627881	0.0923282	0.0412904	0.651568	0.660185	0.0857728	0.0383587	0.746503	0.694655	0.14889	0.0665856	0.761715	0.806702	0.15379	0.068777	0.665366	0.607655	0.113221	0.0506341	0.674002	0.660573	0.0912592	0.0408124
7	urea	0.885541	0.875924	0.10422	0.0466087	1.0331	1.03597	0.0487443	0.0217991	0.81203	0.816226	0.154008	0.0770042	1.09067	1.05085	0.197865	0.0884877	0.902176	0.889978	0.0702612	0.0314218	0.831939	0.846602	0.0466434	0.0208596	0.883242	0.876156	0.0685139	0.0306404	0.864573	0.859279	0.0641381	0.0286834	0.865971	0.840276	0.144049	0.0644206	0.90412	0.858424	0.151043	0.0675484	0.823616	0.914601	0.234651	0.104939	0.877361	0.896915	0.0601611	0.0269049
8	glycine	0.671971	0.68718	0.0852897	0.0381427	0.646077	0.60828	0.116041	0.0518951	0.666612	0.6567	0.0633899	0.031695	0.615349	0.629512	0.0615682	0.0275341	0.659681	0.640946	0.0553578	0.0247568	0.590606	0.594993	0.072287	0.0323277	0.628291	0.676981	0.0913653	0.0408598	0.623461	0.634669	0.0313188	0.0140062	0.600967	0.582747	0.12798	0.0572342	0.586363	0.62095	0.107765	0.0481941	0.625502	0.714241	0.192855	0.0862473	0.556264	0.57678	0.0756635	0.0338377
9	succinate	0.581686	0.597597	0.0836202	0.0373961	0.578928	0.595925	0.049969	0.0223468	0.567532	0.576124	0.143037	0.0715186	0.50667	0.500131	0.0441241	0.0197329	0.639685	0.676498	0.0742985	0.0332273	0.542846	0.544663	0.0925717	0.0413993	0.574916	0.600239	0.0880152	0.0393616	0.546878	0.535705	0.0768623	0.0343739	0.457918	0.469394	0.0988968	0.044228	0.576987	0.533636	0.114162	0.0510548	0.471154	0.490789	0.0915422	0.0409389	0.476602	0.502692	0.0964821	0.0431481
10	glyceric acid	0.0947711	0.0921714	0.0216312	0.00967378	0.0908295	0.0783614	0.0269194	0.0120387	0.0645293	0.0625875	0.0108235	0.00541174	0.0860802	0.104813	0.0302286	0.0135187	0.0678275	0.0655688	0.0177073	0.00791893	0.13857	0.12435	0.0406122	0.0181623	1.14142	1.1226	0.0506649	0.022658	1.03491	1.00098	0.0723934	0.0323753	1.04043	1.1632	0.256199	0.114576	0.97627	1.00052	0.14142	0.0632452	1.03259	1.09598	0.156871	0.070155	0.961804	1.01105	0.0870807	0.0389437
11	porphyrin	1.17013	1.24795	0.335926	0.150231	1.35233	1.26334	0.48241	0.21574	0.922913	0.909115	0.295226	0.147613	1.15716	0.88949	0.739987	0.330932	0.735914	0.738766	0.0912849	0.0408239	0.985407	0.880361	0.217351	0.0972024	0.803233	0.775668	0.197471	0.0883116	0.81797	0.864953	0.158086	0.0706984	0.739717	0.610993	0.346329	0.154883	0.722237	0.72851	0.22307	0.0997599	0.702286	0.77178	0.234766	0.104991	0.741888	0.587822	0.361539	0.161685
12	uracil	0.676874	0.666219	0.0934566	0.0417951	0.618434	0.624644	0.0798247	0.0356987	0.695133	0.679804	0.0864123	0.0432061	0.568144	0.568667	0.0340112	0.0152103	0.60587	0.6242	0.0831379	0.0371804	0.621853	0.611891	0.0392385	0.017548	0.729454	0.714459	0.0671704	0.0300395	0.735334	0.727572	0.0568531	0.0254255	0.647813	0.71308	0.141158	0.0631279	0.763775	0.718408	0.161198	0.0720899	0.666564	0.759986	0.185982	0.0831737	0.600108	0.612012	0.050562	0.022612
13	fumarate	0.594343	0.609529	0.0646777	0.0289247	0.691221	0.67411	0.0915599	0.0409468	0.618395	0.579309	0.129528	0.0647642	0.619824	0.660395	0.0963364	0.0430829	0.704379	0.731794	0.0624519	0.0279294	0.461457	0.483369	0.0977163	0.0437001	0.495972	0.475973	0.0994752	0.0444867	0.530595	0.520181	0.0385797	0.0172534	0.483667	0.516396	0.0813266	0.0363704	0.517682	0.49597	0.108806	0.0486597	0.447304	0.457146	0.0784038	0.0350633	0.489894	0.472755	0.087352	0.039065
14	threonine	0.391633	0.407978	0.102535	0.045855	0.341682	0.333405	0.0916942	0.0410069	0.483467	0.485266	0.066783	0.0333915	0.437222	0.441428	0.109474	0.0489583	0.476224	0.496503	0.0637553	0.0285123	0.454517	0.452554	0.0586706	0.0262383	0.48952	0.484618	0.0761736	0.0340659	0.42472	0.406011	0.0654953	0.0292904	0.417318	0.438312	0.100629	0.0450028	0.505946	0.466248	0.124079	0.0554897	0.466575	0.489517	0.112525	0.0503225	0.60556	0.564864	0.178817	0.0799694
15	thymine	0.644385	0.603512	0.161573	0.0722575	0.664068	0.661119	0.131505	0.058811	0.763803	0.695075	0.188037	0.0940185	0.557147	0.514933	0.0728257	0.0325686	0.67169	0.706763	0.0622966	0.0278599	0.660862	0.637594	0.0700577	0.0313308	0.642832	0.661533	0.0720525	0.0322228	0.664905	0.667287	0.0503985	0.0225389	0.602792	0.67187	0.192641	0.0861515	0.601561	0.562233	0.0806864	0.036084	0.517124	0.580428	0.130306	0.0582745	0.642019	0.641229	0.0927639	0.0414853
16	6-hydroxyhexanoic acid	0.491244	0.571965	0.23062	0.103136	0.281382	0.258344	0.118051	0.0527941	0.359812	0.374091	0.0559829	0.0279914	0.42346	0.227486	0.298747	0.133604	0.39816	0.361786	0.142964	0.0639355	0.401965	0.37307	0.153311	0.0685629	0.644973	0.708866	0.190726	0.0852954	0.496181	0.534326	0.0975747	0.0436367	0.393262	0.364894	0.219532	0.0981775	0.308636	0.267387	0.114411	0.0511663	0.369604	0.428695	0.151895	0.0679295	0.389686	0.349324	0.137498	0.0614908
17	Beta-alanine	0.398599	0.307522	0.216287	0.0967267	0.357648	0.319805	0.0913162	0.0408378	0.325077	0.294335	0.0834839	0.041742	0.337482	0.291578	0.148188	0.0662716	0.372453	0.371125	0.0479638	0.0214501	0.265319	0.282151	0.073416	0.0328326	0.280937	0.307726	0.0727888	0.0325522	0.275741	0.260982	0.0404741	0.0181006	0.355382	0.332159	0.129185	0.0577732	0.335263	0.302149	0.171903	0.0768774	0.348104	0.390404	0.0895664	0.0400553	0.233833	0.216106	0.0558331	0.0249693
18	trans-3-hydroxy-proline	0.315665	0.296631	0.157691	0.0705215	0.253306	0.289509	0.0933995	0.0417695	0.225682	0.226165	0.0401378	0.0200689	0.223066	0.249715	0.0687738	0.0307566	0.197315	0.202651	0.0839731	0.0375539	0.201144	0.200636	0.0790273	0.0353421	0.31023	0.232735	0.145145	0.0649108	0.289442	0.335323	0.0959518	0.0429109	0.394911	0.342876	0.173048	0.0773894	0.314073	0.256817	0.152833	0.068349	0.243772	0.232134	0.0721987	0.0322883	0.296795	0.321487	0.113471	0.0507456
19	1-methylnicotinamide	0.677353	0.696712	0.0431075	0.0192782	0.466549	0.476704	0.149262	0.066752	0.7273	0.710339	0.301443	0.150722	0.506518	0.391661	0.316909	0.141726	0.568388	0.534338	0.111843	0.0500175	0.679183	0.463394	0.401471	0.179543	0.484462	0.47485	0.147567	0.0659938	0.503384	0.493896	0.0830421	0.0371376	0.394659	0.362509	0.188224	0.0841761	0.375257	0.355646	0.116658	0.0521711	0.359692	0.373761	0.0543685	0.0243143	0.359404	0.327352	0.0763295	0.0341356
20	malate	0.717216	0.774651	0.096766	0.0432751	0.685347	0.731038	0.0865359	0.0387	0.682134	0.696239	0.0832686	0.0416343	0.610023	0.613837	0.0105822	0.00473251	0.705063	0.730638	0.0534288	0.0238941	0.565333	0.562612	0.0718304	0.0321235	0.525503	0.533173	0.0703521	0.0314624	0.546406	0.558589	0.030053	0.0134401	0.456747	0.49197	0.0991263	0.0443306	0.513781	0.482536	0.0750359	0.0335571	0.448469	0.472663	0.0463533	0.0207298	0.466054	0.452999	0.0552218	0.0246959
21	pyroglutamate	0.808379	0.809064	0.0404019	0.0180683	0.808879	0.791421	0.0742886	0.0332229	0.780246	0.774002	0.0415815	0.0207907	0.800773	0.803808	0.0616846	0.0275862	0.813561	0.814573	0.0200462	0.00896492	0.772047	0.778776	0.0405741	0.0181453	0.820421	0.803984	0.0676392	0.0302492	0.814515	0.793192	0.0431042	0.0192768	0.781669	0.870644	0.1845	0.082511	0.789277	0.806737	0.0564278	0.0252353	0.743544	0.82549	0.220877	0.0987792	0.760787	0.70987	0.0997805	0.0446232
22	4-guanidinobutyric acid	0.131035	0.136719	0.0532951	0.0238343	0.0795492	0.0774701	0.0538064	0.024063	0.227287	0.186103	0.153146	0.076573	0.131848	0.107652	0.0996843	0.0445802	0.141186	0.142006	0.0349815	0.0156442	0.180307	0.142125	0.125308	0.0560392	0.18986	0.148143	0.126661	0.0566447	0.083322	0.070921	0.0372129	0.0166421	0.1031	0.0973751	0.0381228	0.017049	0.0777572	0.0581931	0.0768137	0.0343521	0.185856	0.0930774	0.221895	0.0992343	0.0629591	0.0358349	0.0550933	0.0246385
23	glutamine	0.616624	0.621098	0.127506	0.0570224	0.6055	0.620877	0.137544	0.0615115	0.750592	0.746115	0.115524	0.0577622	0.771591	0.800937	0.0693579	0.0310178	0.683863	0.673126	0.126462	0.0565555	0.698498	0.644772	0.0851105	0.0380626	0.651808	0.668739	0.0439794	0.0196682	0.564036	0.554899	0.0589902	0.0263812	0.610566	0.645287	0.181135	0.081006	0.690386	0.641997	0.0954865	0.0427028	0.596467	0.625158	0.136936	0.0612397	0.759315	0.764115	0.127748	0.0571307
24	phenylalanine	0.561408	0.596068	0.15501	0.0693225	0.57505	0.571416	0.155511	0.0695468	0.617876	0.650323	0.105411	0.0527054	0.537013	0.536766	0.0977733	0.0437256	0.626099	0.649843	0.102809	0.0459775	0.616317	0.594328	0.122678	0.0548632	0.577335	0.583638	0.0408195	0.018255	0.593909	0.619326	0.0703945	0.0314814	0.54566	0.566352	0.189045	0.0845436	0.653682	0.647328	0.0964608	0.0431386	0.500504	0.487888	0.114834	0.0513552	0.728853	0.731451	0.0660892	0.029556
25	creatinine	0.748093	0.878688	0.288024	0.128808	0.73486	0.852049	0.275701	0.123297	0.662024	0.626985	0.245751	0.122876	0.858989	0.998658	0.39463	0.176484	0.676876	0.763635	0.152062	0.068004	0.71958	0.851845	0.257615	0.115209	0.846582	0.838449	0.325897	0.145746	0.862183	0.909411	0.287978	0.128787	0.784925	0.738455	0.222073	0.0993139	0.6798	0.689632	0.269094	0.120343	0.579604	0.541519	0.130228	0.0582396	0.713569	0.755292	0.2266	0.101339
26	alpha-ketoglutarate	0.634975	0.693635	0.11383	0.0509062	0.575615	0.577485	0.095083	0.0425224	0.687712	0.685649	0.0583839	0.029192	0.571144	0.561121	0.0291024	0.013015	0.7856	0.789527	0.120416	0.0538517	0.601993	0.616921	0.0806893	0.0360853	0.357934	0.343914	0.0564206	0.0252321	0.338075	0.331656	0.0311601	0.0139352	0.323147	0.354002	0.0742525	0.0332067	0.382366	0.379538	0.0215368	0.00963155	0.361065	0.344894	0.0424165	0.0189692	0.395799	0.382377	0.0524892	0.0234739
27	phosphoenolpyruvic acid	0.582279	0.557771	0.239609	0.107156	0.469217	0.590519	0.192759	0.0862045	0.396622	0.377983	0.121147	0.0605737	0.45213	0.459122	0.0788978	0.0352842	0.879939	0.785245	0.229197	0.1025	0.626801	0.469423	0.430404	0.192483	0.354644	0.388937	0.162384	0.0726205	0.533003	0.555924	0.168037	0.0751484	0.250876	0.218349	0.0962941	0.043064	0.684331	0.634075	0.417233	0.186592	0.214266	0.188348	0.0479904	0.021462	0.310023	0.268545	0.0975334	0.0436182
28	3-hydroxy-3-methylglutaric acid	0.350602	0.374706	0.0958535	0.042867	0.320742	0.284328	0.0760646	0.0340171	0.394824	0.397338	0.0519064	0.0259532	0.286752	0.285037	0.0416414	0.0186226	0.423452	0.402838	0.0521871	0.0233388	0.304829	0.315673	0.0638884	0.0285718	0.888416	0.882401	0.0624864	0.0279448	0.830849	0.788037	0.132861	0.0594174	0.693149	0.785896	0.203778	0.0911325	0.626459	0.619768	0.119344	0.0533723	0.810734	0.811586	0.181748	0.08128	0.51869	0.465354	0.136181	0.0609021
29	N-acetyl-aspartic acid	0.639828	0.663675	0.0688983	0.0308122	0.622097	0.626089	0.0551729	0.0246741	0.692522	0.680894	0.0333766	0.0166883	0.565059	0.552498	0.0394228	0.0176304	0.725813	0.718568	0.0421926	0.0188691	0.541177	0.57629	0.0840157	0.037573	0.675471	0.661246	0.0351004	0.0156974	0.627413	0.622319	0.0302725	0.0135383	0.633502	0.720054	0.140357	0.0627694	0.569345	0.539824	0.114959	0.0514114	0.600456	0.668065	0.108726	0.0486237	0.447413	0.40665	0.120036	0.0536819
30	asparagine	0.291691	0.259584	0.163808	0.0732571	0.234415	0.181314	0.122599	0.054828	0.413339	0.447193	0.128658	0.0643289	0.268218	0.277235	0.130214	0.0582335	0.455879	0.518994	0.169259	0.0756949	0.375082	0.421237	0.1866	0.0834499	0.456953	0.459448	0.197398	0.0882791	0.435813	0.477841	0.149216	0.0667315	0.335252	0.290576	0.187124	0.0836842	0.315679	0.321131	0.167038	0.0747016	0.330493	0.312484	0.0597774	0.0267333	0.183236	0.154131	0.0844741	0.037778
31	N-methyl-glutamic acid	1.15749	1.2246	0.159612	0.0713805	1.04173	1.04357	0.157748	0.0705469	0.868619	0.884352	0.0946544	0.0473272	0.790879	0.679812	0.296119	0.132429	1.2231	1.43043	0.419266	0.187501	0.854048	0.857848	0.171376	0.0766418	0.768892	0.768429	0.201874	0.090281	0.751378	0.748736	0.0925023	0.0413683	0.892937	0.959622	0.294703	0.131795	0.537316	0.459621	0.317009	0.141771	0.941956	0.963465	0.163501	0.0731197	0.423989	0.27556	0.305707	0.136716
32	glycerol 2-phosphate	0.323496	0.337925	0.0338594	0.0151424	0.321817	0.287611	0.0531127	0.0237527	0.323881	0.322135	0.0812051	0.0406025	0.303774	0.313979	0.022293	0.00996975	0.365003	0.370335	0.0385992	0.0172621	0.269899	0.276436	0.0471642	0.0210924	0.381367	0.374307	0.0311935	0.0139502	0.366506	0.378185	0.0213882	0.00956508	0.337545	0.370862	0.0668578	0.0298997	0.365765	0.367409	0.0404507	0.0180901	0.324909	0.339096	0.0691061	0.0309052	0.356762	0.342885	0.0881275	0.0394118
33	putrescine	0.455689	0.450797	0.0426014	0.0190519	0.389769	0.362248	0.0720235	0.0322099	0.491126	0.519703	0.080084	0.040042	0.482024	0.474164	0.0867756	0.0388072	0.568022	0.573887	0.125615	0.0561767	0.456944	0.436569	0.11089	0.0495917	0.405805	0.427186	0.100733	0.045049	0.35726	0.333301	0.0805849	0.0360387	0.409273	0.467921	0.116642	0.0521641	0.450459	0.472708	0.082481	0.0368866	0.379142	0.381533	0.0781276	0.0349397	0.691585	0.547359	0.345544	0.154532
34	trans-aconitic acid	0.392442	0.382404	0.101151	0.0452362	0.332315	0.321387	0.0634236	0.0283639	0.4298	0.420503	0.0820654	0.0410327	0.350747	0.352413	0.0735338	0.0328853	0.442762	0.442981	0.066357	0.0296758	0.365487	0.360575	0.0299777	0.0134064	0.443087	0.438534	0.0826441	0.0369596	0.412573	0.384383	0.0723778	0.0323683	0.391022	0.424598	0.110767	0.0495363	0.485852	0.456726	0.0643599	0.0287826	0.402546	0.414118	0.0380582	0.0170201	0.557711	0.569485	0.0666095	0.0297887
35	glycerol 1-phosphate	0.705145	0.717691	0.0444798	0.0198919	0.738721	0.752374	0.0316827	0.014169	0.64103	0.649156	0.13371	0.0668548	0.680701	0.707814	0.0749139	0.0335025	0.728294	0.73706	0.0303695	0.0135817	0.565664	0.560765	0.0838007	0.0374768	0.737925	0.74427	0.0250781	0.0112152	0.741738	0.725831	0.0672948	0.0300951	0.739924	0.792025	0.151914	0.0679378	0.744969	0.701993	0.116405	0.0520577	0.695672	0.775368	0.184165	0.0823611	0.679377	0.711257	0.0957658	0.0428278
36	O-phosphoethanolamine	0.491782	0.482694	0.0751432	0.033605	0.523717	0.549181	0.0836278	0.0373995	0.473163	0.463631	0.0417383	0.0208691	0.604949	0.622897	0.0901292	0.040307	0.4754	0.467276	0.046501	0.0207959	0.629836	0.614326	0.0480152	0.0214731	0.721849	0.711843	0.0760824	0.0340251	0.665837	0.661529	0.0384698	0.0172042	0.620938	0.632423	0.101963	0.0455991	0.674513	0.662199	0.0441674	0.0197522	0.571487	0.652448	0.160405	0.0717353	0.690855	0.710838	0.0947343	0.0423665
37	N-acetyl-glutamic acid	0.622231	0.653558	0.0993536	0.0444323	0.589804	0.595373	0.0687081	0.0307272	0.615054	0.603647	0.0318877	0.0159438	0.50449	0.515247	0.031167	0.0139383	0.694654	0.71336	0.062307	0.0278645	0.503579	0.535185	0.106438	0.0476007	0.541009	0.521971	0.0437045	0.0195452	0.511993	0.507583	0.0268712	0.0120172	0.46515	0.516402	0.101686	0.0454756	0.453545	0.424527	0.06854	0.030652	0.471678	0.494178	0.0713359	0.0319024	0.366851	0.339336	0.101815	0.0455333
38	citrate	0.504984	0.503871	0.0610484	0.0273017	0.48198	0.505106	0.0865208	0.0386933	0.567225	0.575562	0.049015	0.0245075	0.519381	0.526465	0.0486451	0.0217547	0.571842	0.569877	0.0396164	0.017717	0.560043	0.581062	0.0821564	0.0367415	0.465022	0.496577	0.0728861	0.0325956	0.499526	0.482279	0.0399171	0.0178515	0.421356	0.481711	0.112973	0.0505233	0.527638	0.551424	0.0822207	0.0367702	0.480037	0.474106	0.0905622	0.0405007	0.62817	0.595722	0.136948	0.0612449
39	isocitrate	0.507497	0.511211	0.0643111	0.0287608	0.48001	0.502182	0.0921733	0.0412212	0.57192	0.577976	0.0454533	0.0227266	0.519233	0.530852	0.0496657	0.0222112	0.573892	0.571669	0.041327	0.018482	0.563895	0.58185	0.083946	0.0375418	0.471278	0.508995	0.0741387	0.0331558	0.502768	0.482995	0.0427381	0.0191131	0.421661	0.473105	0.113394	0.0507114	0.528039	0.549951	0.0882074	0.0394476	0.483769	0.47515	0.0932525	0.0417038	0.631814	0.596886	0.140182	0.0626914
40	adenine	0.618381	0.610128	0.0307051	0.0137318	0.598493	0.586253	0.0456928	0.0204344	0.617772	0.63161	0.0538698	0.0269349	0.609271	0.618222	0.06503	0.0290823	0.611289	0.63582	0.0590307	0.0263993	0.600112	0.583782	0.0452207	0.0202233	0.638003	0.644798	0.0185771	0.00830795	0.613549	0.614833	0.0268295	0.0119985	0.571822	0.594289	0.110447	0.0493932	0.640013	0.610423	0.0828359	0.0370453	0.581116	0.615145	0.108271	0.0484201	0.623918	0.615684	0.0653821	0.0292397
41	fructose	0.827788	0.808015	0.283256	0.126676	0.927947	0.947781	0.0793095	0.0354683	0.898108	0.812519	0.213393	0.106696	1.12687	1.02414	0.334615	0.149644	0.95718	0.970978	0.237645	0.106278	1.18757	1.21221	0.234219	0.104746	0.850293	0.784959	0.335698	0.150129	0.905894	0.80856	0.223315	0.0998697	0.68473	0.580436	0.275201	0.123074	0.781854	0.802435	0.158404	0.0708405	0.792044	0.817704	0.128057	0.0572689	1.37596	1.05219	0.6967	0.311574
42	dehydroascorbic acid	0.612521	0.681682	0.14341	0.0641351	0.631476	0.668623	0.0969843	0.0433727	0.681764	0.657682	0.0947276	0.0473638	0.688953	0.667536	0.0714787	0.0319663	0.715204	0.713158	0.139257	0.0622778	0.622555	0.602828	0.0800604	0.0358041	0.751505	0.750286	0.270165	0.120821	0.696509	0.672785	0.0759539	0.0339676	0.729144	0.759593	0.129032	0.0577051	0.866507	0.864235	0.0506571	0.0226546	0.643273	0.680463	0.165478	0.0740038	0.849864	0.860368	0.19241	0.0860483
43	tyrosine	0.583109	0.545181	0.0868183	0.0388263	0.472954	0.470079	0.062538	0.0279678	0.469642	0.455463	0.0450241	0.022512	0.622495	0.639883	0.145685	0.0651524	0.490783	0.492788	0.0970498	0.043402	0.584	0.626858	0.138174	0.0617931	0.492973	0.447878	0.067092	0.0300045	0.515691	0.52894	0.0413898	0.0185101	0.471293	0.459353	0.0819553	0.0366515	0.632965	0.585688	0.173588	0.0776308	0.492505	0.455957	0.120781	0.0540147	0.638542	0.647739	0.131416	0.0587709
44	ascorbic acid	0.24201	0.243295	0.106664	0.0477015	0.140797	0.135359	0.0483488	0.0216222	0.212911	0.222248	0.0375475	0.0187737	0.221121	0.210576	0.0901853	0.0403321	0.262587	0.296323	0.13194	0.0590052	0.244145	0.23468	0.0848837	0.0379611	0.13801	0.140332	0.0249833	0.0111729	0.17751	0.140199	0.10761	0.0481246	0.119264	0.124953	0.0476854	0.0213255	0.248184	0.259571	0.0608295	0.0272038	0.133931	0.127696	0.044343	0.0198308	0.180257	0.220174	0.0778502	0.0348157
45	pantothenic acid	0.630822	0.656934	0.0818526	0.0366056	0.604053	0.599872	0.109875	0.0491377	0.802401	0.808342	0.0836798	0.0418399	0.709682	0.691088	0.0640551	0.0286463	0.869343	0.831308	0.0945861	0.0423002	0.738442	0.754183	0.0791488	0.0353964	0.51024	0.507524	0.0509078	0.0227667	0.495512	0.498237	0.0617873	0.0276321	0.495682	0.490542	0.149998	0.0670814	0.517875	0.513263	0.0566068	0.0253154	0.530027	0.523784	0.101231	0.0452717	0.597326	0.597818	0.0557588	0.0249361
46	xanthine	0.575788	0.629063	0.097204	0.043471	0.45474	0.441931	0.0459514	0.0205501	0.630434	0.574271	0.218574	0.109287	0.593941	0.521766	0.17991	0.0804581	0.490313	0.500341	0.102267	0.045735	0.759419	0.765695	0.111041	0.0496593	0.62805	0.585366	0.106206	0.0474966	0.682211	0.692914	0.103478	0.0462766	0.505874	0.499987	0.0824098	0.0368548	0.819792	0.724137	0.214766	0.0960463	0.545645	0.561578	0.128038	0.0572603	0.630134	0.606362	0.094105	0.042085
47	cytidine-5'-monophosphate	0.43275	0.4554	0.0690178	0.0308657	0.438514	0.419737	0.0449822	0.0201166	0.416117	0.396978	0.0770709	0.0385354	0.435729	0.401444	0.0780163	0.03489	0.550969	0.561918	0.0769416	0.0344093	0.475608	0.484431	0.0336126	0.015032	0.517069	0.541034	0.0716292	0.0320335	0.543997	0.554622	0.0736005	0.0329151	0.473486	0.479497	0.143646	0.0642404	0.568983	0.577822	0.0403983	0.0180667	0.472742	0.443028	0.113517	0.0507664	0.598665	0.549236	0.164508	0.0735704
48	myo-inositol	0.882081	0.886842	0.0224614	0.010045	0.903461	0.921158	0.0544173	0.0243361	0.803546	0.797131	0.0646865	0.0323433	0.92634	0.914386	0.107625	0.0481315	0.804034	0.830292	0.0520153	0.023262	0.872618	0.840299	0.122648	0.0548499	0.857242	0.850943	0.0934037	0.0417714	0.889987	0.917192	0.102798	0.0459727	0.873521	0.89461	0.149978	0.0670721	0.926044	0.943127	0.0839369	0.0375377	0.795845	0.825305	0.250351	0.111961	0.973282	0.957913	0.0712755	0.0318754
49	ribose-5-phosphate	0.876592	0.8988	0.135382	0.0605447	0.719775	0.718869	0.142394	0.0636805	0.873874	0.798092	0.168852	0.084426	0.686583	0.596012	0.307621	0.137572	0.765962	0.765489	0.0918035	0.0410558	0.968736	0.886234	0.335084	0.149854	0.636114	0.595256	0.180433	0.0806919	0.639004	0.561819	0.195967	0.0876392	0.466043	0.486911	0.122563	0.054812	0.625163	0.640626	0.120388	0.0538389	0.57957	0.584298	0.165415	0.0739758	0.514602	0.519299	0.0605521	0.0270797
50	ribulose-5-phosphate	0.707028	0.731872	0.090427	0.0404402	0.650201	0.628796	0.14503	0.0648596	0.664705	0.685932	0.104447	0.0522237	0.691751	0.643577	0.294547	0.131725	0.577421	0.580375	0.072301	0.032334	0.542752	0.44689	0.16086	0.0719387	0.403025	0.364713	0.0763006	0.0341226	0.45636	0.45993	0.0963546	0.0430911	0.370725	0.386447	0.0746879	0.0334015	0.483386	0.38879	0.20212	0.0903908	0.373797	0.373053	0.053997	0.0241482	0.600022	0.54604	0.118538	0.0530117
51	norepinephrine	0.599687	0.611206	0.0680086	0.0304144	0.631897	0.686361	0.125857	0.0562849	0.566931	0.584818	0.0604505	0.0302253	0.596009	0.596161	0.061461	0.0274862	0.595349	0.609631	0.0486712	0.0217664	0.49716	0.47403	0.0561725	0.0251211	0.600247	0.61481	0.0668505	0.0298964	0.506869	0.480302	0.0659396	0.0294891	0.535948	0.496676	0.0919464	0.0411197	0.491843	0.510565	0.0649846	0.029062	0.501435	0.498475	0.143249	0.0640631	0.549483	0.555713	0.0540897	0.0241897
52	glutathione	1.18587	1.29762	0.324787	0.145249	1.06344	0.920376	0.500107	0.223654	1.41602	1.39046	0.176901	0.0884505	1.12136	1.16028	0.548903	0.245477	1.46397	1.49927	0.0961909	0.0430179	1.4139	1.45196	0.28311	0.12661	1.24195	1.24869	0.158434	0.0708539	1.10756	1.06551	0.138752	0.0620518	0.964247	0.757472	0.548808	0.245434	0.990166	1.07817	0.411184	0.183887	1.1707	1.41032	0.583435	0.26092	0.981115	0.915464	0.357945	0.160078
53	tryptophan	0.64499	0.501677	0.266929	0.119374	0.512934	0.386223	0.272363	0.121804	0.33597	0.341187	0.0839142	0.0419571	0.605105	0.578144	0.123837	0.0553815	0.492188	0.476811	0.174208	0.0779082	0.554778	0.529148	0.177136	0.0792175	0.545655	0.536679	0.0535764	0.0239601	0.578994	0.553396	0.131426	0.0587755	0.859535	0.787401	0.425977	0.190503	0.743451	0.597502	0.420107	0.187878	0.614328	0.53476	0.249331	0.111504	0.817224	0.784571	0.321249	0.143667
54	5-hydroxyindole-3-acetic acid	0.428444	0.424263	0.0947996	0.0423957	0.339968	0.324607	0.026732	0.0119549	0.482236	0.481036	0.0490179	0.0245089	0.458999	0.465609	0.0285794	0.0127811	0.551737	0.598243	0.0840007	0.0375663	0.491543	0.501816	0.0649647	0.0290531	0.500645	0.502412	0.0622742	0.0278499	0.408481	0.431621	0.0716241	0.0320313	0.522749	0.52458	0.122736	0.0548892	0.545751	0.535996	0.0712533	0.0318655	0.527496	0.554656	0.0987226	0.0441501	0.684981	0.702849	0.142926	0.0639183
55	inosine	0.440939	0.450319	0.0901533	0.0403178	0.265331	0.279411	0.0441211	0.0197315	0.693215	0.657182	0.232526	0.116263	0.378607	0.284458	0.22485	0.100556	0.437693	0.431178	0.126775	0.0566957	0.625048	0.687725	0.197755	0.0884387	0.740363	0.654645	0.218486	0.0977098	0.59822	0.593145	0.120835	0.0540389	0.455195	0.449484	0.143786	0.0643029	0.712139	0.776368	0.270193	0.120834	0.527415	0.463643	0.143795	0.064307	0.36691	0.376212	0.0311276	0.0139207
56	adenosine	0.45296	0.436543	0.110323	0.0493378	0.440909	0.433091	0.0887752	0.0397015	0.551753	0.552852	0.266411	0.133205	0.361203	0.371365	0.116735	0.0522054	0.672555	0.660657	0.175909	0.078669	0.484161	0.460958	0.203428	0.090976	0.520027	0.526356	0.122409	0.0547431	0.729074	0.675521	0.255689	0.114347	0.391774	0.40461	0.0978257	0.043749	0.581339	0.433225	0.250766	0.112146	0.428576	0.419589	0.145082	0.0648828	0.392763	0.402812	0.108262	0.0484164
57	guanosine	0.326443	0.32316	0.099369	0.0444392	0.256251	0.282636	0.0919038	0.0411006	0.491915	0.456159	0.17642	0.0882099	0.296318	0.260737	0.11065	0.0494844	0.51364	0.497282	0.170537	0.0762663	0.453266	0.514619	0.153825	0.0687927	0.55235	0.584522	0.137075	0.0613017	0.538456	0.59256	0.126922	0.0567611	0.285108	0.190533	0.153422	0.0686124	0.576577	0.688196	0.184411	0.0824713	0.405043	0.372805	0.137038	0.0612854	0.362857	0.354204	0.0755833	0.0338019
58	5'-Deoxy-5'-(methylthio)adenosine	0.442611	0.449747	0.073413	0.0328313	0.412729	0.431051	0.0701032	0.0313511	0.454121	0.457724	0.017205	0.00860251	0.473202	0.465755	0.020288	0.00907307	0.51389	0.522596	0.082113	0.0367221	0.44725	0.472643	0.0664768	0.0297293	0.454581	0.485206	0.070139	0.0313671	0.401179	0.402469	0.049143	0.0219774	0.338832	0.317124	0.080571	0.0360324	0.426422	0.442374	0.036173	0.0161771	0.366571	0.336921	0.101232	0.0452724	0.49012	0.478635	0.045988	0.0205665
59	uridine 5'-monophosphate	0.780425	0.767864	0.0905008	0.0404732	0.872019	0.824458	0.279437	0.124968	0.821019	0.848505	0.169651	0.0848254	0.763163	0.778287	0.176973	0.0791446	0.849176	0.723107	0.226832	0.101443	0.933509	0.749841	0.297892	0.133221	0.692994	0.678164	0.136157	0.0608915	0.801698	0.862751	0.184321	0.082431	0.643842	0.607981	0.255619	0.114316	0.896706	0.879868	0.292264	0.130704	0.682272	0.753592	0.311344	0.139237	0.941359	0.83659	0.235819	0.105462
60	inosine 5'-monophosphate	0.545735	0.551952	0.147796	0.0660964	0.431099	0.483049	0.128432	0.0574364	0.731423	0.782133	0.111826	0.0559132	0.443248	0.401578	0.165675	0.0740923	0.492727	0.504684	0.0709509	0.0317302	0.439513	0.334779	0.226724	0.101394	0.723748	0.731861	0.110921	0.0496054	0.557389	0.526852	0.111859	0.0500247	0.548912	0.59265	0.145144	0.0649103	0.47855	0.509418	0.149182	0.0667162	0.60044	0.62829	0.146154	0.0653622	0.308852	0.300208	0.0723707	0.0323651
61	adenosine 5'-monophosphate	0.548647	0.580128	0.0895511	0.0400485	0.544667	0.603788	0.104718	0.0468315	0.649955	0.64404	0.104855	0.0524275	0.419282	0.365821	0.130254	0.0582514	0.693596	0.71799	0.0575024	0.0257159	0.58509	0.603738	0.167326	0.0748306	0.545132	0.554049	0.0761212	0.0340425	0.47699	0.458128	0.095419	0.0426727	0.430661	0.408951	0.155292	0.0694487	0.499867	0.519016	0.0552693	0.0247172	0.459322	0.457355	0.0968533	0.0433141	0.405099	0.409319	0.083086	0.0371572
62	guanosine 5'-monophosphate	0.336505	0.362052	0.107505	0.0480777	0.294707	0.342167	0.082398	0.0368495	0.396076	0.396007	0.0243515	0.0121757	0.270952	0.239736	0.090527	0.0404849	0.467971	0.468301	0.106023	0.047415	0.354348	0.405594	0.10089	0.0451193	0.353274	0.350237	0.0999225	0.0446867	0.290815	0.292963	0.0364449	0.0162987	0.246295	0.25807	0.0941222	0.0420927	0.304733	0.303674	0.0714858	0.0319694	0.31397	0.334987	0.0841818	0.0376472	0.26112	0.269821	0.0432064	0.0193225
63	cholesterol	0.814149	0.874042	0.210892	0.0943136	0.760956	0.687252	0.176387	0.0788828	0.5343	0.578343	0.144404	0.0722019	0.482603	0.523297	0.107688	0.0481593	0.352007	0.304634	0.210676	0.0942173	0.324331	0.354174	0.0840844	0.0376037	0.401294	0.358005	0.103444	0.0462615	0.520307	0.509315	0.153217	0.0685208	0.395669	0.384246	0.180513	0.0807279	0.542613	0.436352	0.192101	0.0859102	0.662887	0.424623	0.462655	0.206906	0.392262	0.29419	0.215156	0.0962207
64	alanine	0.545133	0.568432	0.0860814	0.0384968	0.513243	0.521781	0.0745677	0.0333477	0.545096	0.555578	0.0866117	0.0433058	0.507153	0.483539	0.0468254	0.020941	0.554335	0.538663	0.0361576	0.0161702	0.535629	0.54626	0.0691915	0.0309434	0.603471	0.652233	0.0783397	0.0350346	0.572869	0.609549	0.0641996	0.0287109	0.484425	0.484643	0.102436	0.0458107	0.61242	0.630614	0.0776678	0.0347341	0.567373	0.558846	0.0960058	0.0429351	0.542531	0.52223	0.0576811	0.0257958
65	leucine	0.558668	0.477049	0.203659	0.0910791	0.64699	0.743618	0.208341	0.0931731	0.578264	0.596174	0.106998	0.0534992	0.760713	0.576916	0.374442	0.167456	0.641208	0.642231	0.0799742	0.0357655	0.624842	0.625403	0.126264	0.0564671	0.578669	0.525024	0.150995	0.0675271	0.515575	0.500373	0.0310899	0.0139038	0.626969	0.616405	0.251605	0.112521	0.737041	0.574365	0.339041	0.151624	0.657282	0.488606	0.326153	0.14586	0.580828	0.621154	0.0854775	0.0382267
66	methionine	0.667248	0.655084	0.0797114	0.035648	0.640701	0.636798	0.0548592	0.0245338	0.699409	0.703068	0.118545	0.0592726	0.734161	0.81223	0.179087	0.0800903	0.600857	0.602123	0.0690033	0.0308592	0.59446	0.593804	0.0439749	0.0196662	0.789806	0.729576	0.168569	0.0753862	0.711949	0.706283	0.0613	0.0274142	0.608692	0.595595	0.0641854	0.0287046	0.656263	0.643267	0.116329	0.0520241	0.654345	0.67033	0.0756297	0.0338226	0.64775	0.688121	0.0695015	0.031082
67	aspartic acid	0.79612	0.82068	0.116334	0.0520263	0.708933	0.679105	0.135437	0.0605694	0.773473	0.768309	0.0587652	0.0293826	0.726619	0.667043	0.112349	0.0502441	0.772087	0.771047	0.0238814	0.0106801	0.742243	0.74186	0.0565814	0.025304	0.796318	0.768748	0.110379	0.0493632	0.760942	0.763292	0.040398	0.0180665	0.712087	0.676034	0.25556	0.11429	0.665383	0.687228	0.0790702	0.0353613	0.726024	0.749761	0.268728	0.120179	0.587812	0.543676	0.0995158	0.0445048
68	glutamate	0.952956	0.974079	0.127555	0.0570442	1.00102	0.979454	0.11002	0.0492026	0.822152	0.837992	0.039339	0.0196695	0.95572	0.926861	0.149862	0.0670203	0.882128	0.874749	0.0661704	0.0295923	0.806637	0.823542	0.0492669	0.0220328	0.907671	0.945687	0.0826537	0.0369639	0.932649	0.888138	0.134326	0.0600723	0.943134	0.960125	0.146225	0.0653937	0.826762	0.775501	0.237669	0.106289	0.824899	0.830961	0.235364	0.105258	0.732908	0.744756	0.0907884	0.0406018
69	dihydroxyacetone phosphate	0.846953	0.914041	0.1722	0.0770103	0.95665	1.05608	0.274411	0.12272	0.514267	0.543228	0.124245	0.0621223	0.972431	0.973501	0.33821	0.151252	0.611592	0.622455	0.102188	0.0456998	0.623078	0.646061	0.096903	0.0433363	0.518598	0.460031	0.21931	0.0980783	0.621241	0.634545	0.166918	0.074648	0.593429	0.62576	0.1718	0.0768312	0.640411	0.565348	0.248688	0.111217	0.432848	0.383145	0.125163	0.0559746	0.924613	0.930992	0.21412	0.0957574
70	hypoxanthine	0.533245	0.557483	0.070747	0.031639	0.389968	0.399865	0.0410263	0.0183475	0.734137	0.683842	0.191038	0.0955192	0.481085	0.43375	0.177843	0.0795337	0.447431	0.466637	0.116946	0.0522998	0.645638	0.733852	0.151702	0.0678434	0.671399	0.65305	0.122414	0.0547451	0.55079	0.524011	0.11133	0.0497883	0.464514	0.498079	0.0770757	0.0344693	0.686571	0.689334	0.243507	0.1089	0.52909	0.493969	0.157761	0.0705527	0.452073	0.498526	0.086702	0.0387743
71	3-phosphoglycerate	0.609382	0.715271	0.182492	0.0816129	0.484206	0.480395	0.0865132	0.0386899	0.39281	0.401647	0.0992607	0.0496303	0.537988	0.542289	0.0750369	0.0335575	0.623668	0.634335	0.0909779	0.0406866	0.697832	0.675118	0.204194	0.0913182	0.528253	0.539722	0.133409	0.0596624	0.488525	0.490528	0.106809	0.0477663	0.510358	0.507763	0.144963	0.0648295	0.734206	0.806311	0.297723	0.133146	0.426932	0.40848	0.0789053	0.0352875	0.705596	0.731927	0.0947241	0.0423619

## Sheet: Thoracic Data Summary
	metabolite	Presymptomatic								Onset								Late Stage								Presymptomatic								Onset								Late Stage
		C57-NTG				C57-G93A				C57-NTG				C57-G93A				C57-NTG				C57-G93A				129S-NTG				129S-G93A				129S-NTG				129S-G93A				129S-NTG				129S-G93A
		Mean	Median	S.D.	S.E.M.	Mean	Median	S.D.	S.E.M.	Mean	Median	S.D.	S.E.M.	Mean	Median	S.D.	S.E.M.	Mean	Median	S.D.	S.E.M.	Mean	Median	S.D.	S.E.M.	Mean	Median	S.D.	S.E.M.	Mean	Median	S.D.	S.E.M.	Mean	Median	S.D.	S.E.M.	Mean	Median	S.D.	S.E.M.	Mean	Median	S.D.	S.E.M.	Mean	Median	S.D.	S.E.M.
1	lactate	1.36878	1.22445	0.412472	0.184463	0.956759	0.949655	0.25782	0.115301	1.09733	0.925027	0.408357	0.182623	0.841709	0.769361	0.176456	0.0789137	0.784202	0.702542	0.187145	0.083694	1.20023	1.20716	0.0633542	0.0283328	0.873703	0.818271	0.221483	0.09905	0.763239	0.822467	0.184923	0.0827002	0.947155	0.949026	0.268862	0.120239	1.07623	1.09706	0.342637	0.153232	0.911726	0.977906	0.137835	0.0616418	1.23421	1.14094	0.349219	0.156175
2	alanine	1.15248	1.08668	0.302026	0.13507	0.737153	0.740882	0.0711565	0.0318221	0.984577	0.966102	0.141196	0.0631446	1.01748	0.897225	0.3527	0.157732	0.961162	0.964925	0.131337	0.0587359	1.10415	1.03802	0.168044	0.0751517	0.980153	0.899608	0.174747	0.0781491	1.0555	1.03183	0.185381	0.0829049	0.940527	1.03377	0.253442	0.113342	1.21937	1.23992	0.222089	0.0993214	1.12734	1.09283	0.302968	0.135491	1.10614	0.942401	0.301269	0.134731
3	isoleucine	1.03364	0.914174	0.394065	0.176231	0.735495	0.787977	0.106115	0.047456	0.90703	0.890184	0.188169	0.0841517	0.92187	0.985479	0.125534	0.0561407	0.857646	0.819132	0.173777	0.0777154	1.00148	1.00021	0.0674336	0.0301572	0.834909	0.843622	0.133343	0.059633	0.957113	0.942708	0.141384	0.0632287	0.789737	0.837287	0.0960392	0.0429501	1.13365	0.998265	0.209093	0.0935093	0.982427	1.03518	0.130226	0.0582387	1.00959	0.951902	0.179741	0.0803826
4	but-2-yne-1,4-diol	1.18919	0.74391	0.798985	0.357317	1.14496	0.846958	0.46347	0.20727	1.44478	0.855983	0.964999	0.431561	1.56263	0.809444	1.22528	0.547963	1.26338	1.01736	0.773931	0.346112	1.44687	0.867217	0.900151	0.40256	1.11556	0.866575	0.437308	0.19557	0.91926	0.919596	0.398272	0.178113	1.32307	1.04652	0.72611	0.324726	1.31941	0.931424	0.691996	0.30947	1.03969	0.808863	0.394622	0.17648	1.20201	0.827731	0.722117	0.322941
5	urea	0.981989	1.05447	0.293731	0.131361	0.837018	0.745548	0.186556	0.0834304	1.07083	0.946505	0.298654	0.133562	1.08243	1.08445	0.358545	0.160346	0.938691	0.966592	0.172067	0.0769507	1.06655	1.10315	0.1441	0.0644434	0.804387	0.712776	0.255367	0.114203	0.865056	0.874366	0.188417	0.0842628	0.832852	0.788771	0.115611	0.0517026	0.96718	0.944988	0.181738	0.0812759	1.00566	0.969514	0.17229	0.0770505	0.977223	1.05138	0.315141	0.140935
6	threonine	1.23338	0.749771	1.07433	0.480453	1.07831	0.690036	0.808272	0.36147	1.01931	0.682016	0.690948	0.309001	0.811328	0.790172	0.37439	0.167433	0.850821	0.715702	0.269037	0.120317	0.953405	0.626224	0.516185	0.230845	0.878597	0.790468	0.397602	0.177813	0.758248	0.545113	0.356911	0.159615	1.00914	0.62366	0.695939	0.311233	0.817875	0.843716	0.263934	0.118035	0.877154	0.757062	0.407454	0.182219	0.978251	0.764588	0.416592	0.186306
7	glycine	1.59708	1.41123	0.786367	0.351674	1.29169	1.07137	0.639544	0.286013	1.3847	1.27337	0.429593	0.19212	0.934163	0.90423	0.244234	0.109225	1.0837	1.13465	0.147721	0.0660628	0.996131	0.781898	0.380804	0.170301	0.938288	0.956601	0.261025	0.116734	0.843234	0.857198	0.278381	0.124496	1.17397	1.05784	0.480218	0.21476	0.975818	0.992526	0.08109	0.0362645	1.05365	1.08712	0.224556	0.100424	0.948135	1.04125	0.441467	0.19743
8	succinate	1.07558	1.08934	0.144916	0.0648086	0.866464	0.875626	0.1214	0.0542915	1.07229	1.09514	0.109903	0.0491502	0.906037	0.834	0.283167	0.126636	0.907559	0.851696	0.157981	0.0706513	0.980813	0.975988	0.205803	0.0920377	0.894867	0.899766	0.208182	0.0931019	0.975961	1.0162	0.115272	0.0515511	0.804891	0.774364	0.14218	0.0635846	1.0498	1.07939	0.132596	0.0592988	1.0062	0.97757	0.116848	0.0522561	0.872783	0.833876	0.155606	0.0695891
9	glyceric acid	0.377229	0.370455	0.0846188	0.0378427	0.351352	0.340188	0.0631637	0.0282477	0.326836	0.33082	0.0385474	0.0172389	0.463347	0.451118	0.0901654	0.0403232	0.353802	0.365456	0.0520843	0.0232928	0.368499	0.362957	0.0696411	0.0311445	1.41788	1.38121	0.131659	0.0588795	1.57951	1.54117	0.12218	0.0546407	1.71793	1.72925	0.197597	0.0883681	1.61859	1.66249	0.169859	0.0759634	1.72386	1.7041	0.139419	0.0623502	1.48917	1.47123	0.180171	0.0805747
10	porphyrin	1.01251	1.05072	0.205228	0.0917808	0.970186	0.913009	0.107945	0.0482746	1.00092	1.02497	0.217897	0.0974465	1.06747	0.996464	0.143615	0.0642267	0.935219	0.92025	0.152859	0.0683606	1.1857	1.15843	0.153955	0.0688508	0.943117	0.995036	0.108145	0.048364	1.01111	0.975809	0.178565	0.0798567	1.0361	0.99099	0.127932	0.0572129	1.25806	1.1393	0.321536	0.143795	1.09668	1.04605	0.092252	0.0412563	1.18059	1.21252	0.188643	0.0843637
11	uracil	1.00912	0.97318	0.135519	0.060606	0.760358	0.814905	0.0972707	0.0435008	0.951854	0.970634	0.0970793	0.0434152	0.774148	0.742232	0.183333	0.0819891	0.885494	0.883154	0.120268	0.0537855	0.902774	0.892528	0.128523	0.057477	0.936253	0.908445	0.0492606	0.02203	0.973181	0.99651	0.0724973	0.0324218	0.963192	0.911294	0.101923	0.0455812	1.06497	1.05484	0.161045	0.0720214	1.15588	1.07615	0.223875	0.10012	0.954956	0.9677	0.0618897	0.0276779
12	fumarate	1.09508	1.02743	0.141355	0.0632157	1.07418	1.08757	0.102545	0.0458594	1.12157	1.11656	0.133862	0.0598649	1.05066	1.06181	0.227229	0.10162	1.00537	1.04763	0.21461	0.0959765	0.839216	0.787185	0.208063	0.0930485	0.760519	0.73002	0.0904712	0.0404599	0.930223	0.971442	0.125918	0.0563122	0.811329	0.829304	0.134231	0.0600301	0.944801	0.924553	0.0593683	0.0265503	0.863919	0.862442	0.122604	0.05483	0.812558	0.786741	0.116984	0.0523167
13	methionine	2.27786	1.11608	1.98752	0.888848	1.79317	0.880592	1.61599	0.722694	1.23588	1.07799	0.581627	0.260112	0.967324	0.942466	0.123733	0.0553349	0.756681	0.771129	0.159878	0.0714996	0.918999	0.843729	0.17634	0.0788615	1.02556	0.861216	0.325337	0.145495	1.10796	1.1133	0.205668	0.0919777	1.03689	0.978113	0.539484	0.241265	0.902254	0.902242	0.171326	0.0766192	1.12029	1.02896	0.19152	0.0856504	1.56461	1.03995	1.1938	0.533884
14	aspartic acid	1.04482	1.05683	0.117546	0.052568	0.81786	0.753554	0.216454	0.0968011	0.943	0.959859	0.162526	0.0726838	0.869201	0.833616	0.138911	0.062123	0.914192	0.876537	0.232082	0.10379	0.768049	0.744257	0.126248	0.0564597	0.785108	0.701785	0.156845	0.0701432	0.876798	0.86574	0.0886317	0.0396373	0.907024	0.9329	0.166766	0.0745802	0.815625	0.866989	0.116152	0.0519449	0.925471	0.941148	0.110136	0.0492542	0.540229	0.57505	0.0800274	0.0357893
15	Beta-alanine	0.932075	0.945472	0.3205	0.143332	0.690416	0.650127	0.212941	0.0952302	0.958389	1.01581	0.245246	0.109677	1.01481	0.714227	0.878073	0.392686	0.821196	0.761062	0.297902	0.133226	1.41625	1.38993	0.829186	0.370823	0.700305	0.65662	0.215135	0.0962111	0.793576	0.7103	0.212507	0.0950358	0.814947	0.711077	0.30862	0.138019	1.71629	1.25913	1.03393	0.462389	0.948848	0.92184	0.396123	0.177151	0.891953	1.05929	0.415957	0.186022
16	homoserine	1.1453	1.18744	0.241496	0.108	1.07386	1.09808	0.101912	0.0455762	1.04906	1.03	0.142077	0.0635389	1.19889	1.15508	0.222659	0.0995763	0.937426	0.988084	0.156768	0.0701089	11.5824	1.2445	23.2869	10.4142	1.04955	1.07788	0.105434	0.0471516	1.07655	1.06644	0.107574	0.0481085	1.07193	1.06966	0.102812	0.0459791	41.5729	1.28304	55.833	24.9693	1.12701	1.11449	0.13365	0.0597702	1.26033	1.37467	0.268332	0.120002
17	decanoic acid	0.906007	0.908178	0.192737	0.0861946	0.853585	0.85177	0.0924935	0.0413644	0.875856	0.871291	0.104425	0.0467005	0.918258	0.934524	0.104606	0.0467811	0.745032	0.750976	0.0815068	0.036451	0.763616	0.771772	0.0845426	0.0378086	0.824812	0.84596	0.0774178	0.0346223	1.0153	1.03456	0.0839736	0.0375541	1.00061	0.979566	0.0677255	0.0302878	1.04012	1.06632	0.0982957	0.0439592	1.01857	1.00165	0.067674	0.0302647	1.00023	0.95511	0.0977202	0.0437018
18	malate	1.27505	1.31228	0.179438	0.0802469	0.997029	0.984869	0.0946918	0.0423474	1.0825	1.15517	0.158432	0.070853	1.05129	1.0423	0.219246	0.09805	1.01673	1.04791	0.215982	0.0965901	0.942791	0.952843	0.11384	0.0509109	0.733844	0.779362	0.110077	0.0492279	0.93556	0.927701	0.0517948	0.0231633	0.738823	0.711846	0.0959003	0.0428879	0.910039	0.914601	0.0404551	0.0180921	0.8219	0.791977	0.121801	0.0544709	0.820599	0.799681	0.113489	0.0507538
19	1-methylnicotinamide	1.76462	1.54222	0.825508	0.369178	1.04451	0.963118	0.327693	0.146549	1.51929	1.18626	1.16641	0.521635	1.01123	0.921297	0.453151	0.202655	0.885778	0.79825	0.248961	0.111339	1.26122	1.15798	0.468946	0.209719	0.804688	0.818381	0.14299	0.0639469	0.833545	0.894255	0.212889	0.0952067	1.04308	0.910719	0.483923	0.216417	1.03846	1.06397	0.211909	0.0947684	0.853412	0.994367	0.21984	0.0983154	1.2834	0.813452	1.11867	0.500284
20	threitol	0.969762	0.986674	0.110589	0.0494567	0.815248	0.845102	0.0557366	0.0249261	1.00579	1.01607	0.0479903	0.0214619	0.762813	0.873118	0.359931	0.160966	0.922893	0.964188	0.134964	0.0603577	0.970544	0.966642	0.0521996	0.0233444	0.838313	0.849983	0.0563573	0.0252038	0.93787	0.941622	0.0561463	0.0251094	0.942195	0.982964	0.131234	0.0586898	1.05481	1.06889	0.155137	0.0693793	1.01455	0.973856	0.0860643	0.0384891	1.07438	1.15097	0.181329	0.0810929
21	glutamate	1.09483	1.03226	0.144886	0.064795	0.97795	0.972496	0.0591933	0.0264721	1.06726	1.06495	0.129663	0.0579869	0.986404	0.981592	0.116114	0.0519278	0.956614	0.915199	0.111844	0.0500181	0.94552	0.973841	0.0776197	0.0347126	0.924073	0.932357	0.0731264	0.0327031	0.985761	0.990384	0.0354165	0.0158387	0.984329	1.01503	0.11825	0.052883	0.959474	0.957677	0.0949374	0.0424573	1.00405	1.02199	0.0605339	0.0270716	0.930364	0.943379	0.0775492	0.034681
22	pyroglutamate	1.08805	1.03168	0.128539	0.0574844	0.981308	0.980905	0.058941	0.0263592	1.06428	1.06413	0.120915	0.0540747	0.986101	0.98147	0.111297	0.0497736	0.959037	0.920838	0.110386	0.049366	0.947757	0.980796	0.0752146	0.033637	0.926529	0.939012	0.0724482	0.0323998	0.984678	0.991217	0.0346927	0.015515	0.985058	1.01473	0.118277	0.0528953	0.961617	0.963237	0.0938678	0.0419789	1.00211	1.02077	0.0541652	0.0242234	0.932739	0.943314	0.0746391	0.0333796
23	cytosine	1.4483	1.31679	0.544623	0.243563	1.18688	1.05983	0.370416	0.165655	1.16141	0.996893	0.492667	0.220328	1.11472	1.07351	0.133689	0.0597876	0.914654	0.968643	0.119595	0.0534844	1.096	1.02844	0.155705	0.0696335	1.04109	1.05006	0.136327	0.0609674	0.945367	0.958523	0.0287703	0.0128665	1.15865	0.954362	0.381887	0.170785	1.01157	1.02201	0.167841	0.0750609	0.972271	0.962469	0.0470514	0.021042	1.28739	1.24151	0.315575	0.14113
24	phenylalanine	0.953093	0.957382	0.176256	0.078824	0.844746	0.808994	0.154741	0.0692021	0.878118	0.843009	0.114729	0.0513086	0.883907	0.918994	0.158393	0.0708355	0.82623	0.79129	0.173291	0.077498	0.820489	0.769489	0.134319	0.0600691	0.613865	0.613711	0.132435	0.0592266	0.649946	0.648481	0.0993918	0.0444494	0.566409	0.592149	0.0940619	0.0420657	0.7759	0.63613	0.290039	0.129709	0.669825	0.675943	0.0680497	0.0304328	0.731302	0.682997	0.156419	0.0699526
25	phosphoenolpyruvic acid	1.18639	1.14007	0.359023	0.16056	0.885069	0.871533	0.133966	0.0599113	1.03069	0.981985	0.369225	0.165123	1.03284	0.987513	0.204584	0.0914928	0.90214	0.73345	0.295243	0.132036	0.965145	0.907218	0.165798	0.0741473	0.933277	0.915582	0.119352	0.0533758	1.32815	1.14676	0.45261	0.202413	0.97165	0.81686	0.318121	0.142268	1.05669	1.05399	0.20284	0.0907126	0.811428	0.738992	0.207151	0.0926405	1.16071	1.13979	0.358753	0.160439
26	3-hydroxy-3-methylglutaric acid	0.871826	0.92502	0.105552	0.0472044	0.632011	0.617454	0.0759408	0.0339618	0.994042	1.01224	0.0953052	0.0426218	0.545069	0.546041	0.0892449	0.0399115	0.834132	0.793992	0.198452	0.0887504	0.55791	0.56458	0.103076	0.0460968	1.05178	1.03271	0.0991707	0.0443505	1.22061	1.18891	0.0890056	0.0398045	1.25017	1.27288	0.127981	0.0572348	1.14711	1.07203	0.113601	0.0508037	1.33845	1.35223	0.134035	0.0599421	0.846361	0.865881	0.0745556	0.0333423
27	N-acetyl-aspartic.acid	1.14293	1.08028	0.212687	0.0951165	0.869216	0.854477	0.0812153	0.0363206	1.17248	1.2293	0.232313	0.103894	0.817397	0.79481	0.181558	0.0811952	1.00048	0.862883	0.229458	0.102617	0.763456	0.736942	0.179527	0.0802871	0.897563	0.901909	0.101109	0.0452172	0.969023	0.941983	0.0918989	0.0410985	1.07289	1.11442	0.138773	0.0620612	0.947442	0.891317	0.0923377	0.0412947	1.08804	1.14294	0.151045	0.0675496	0.713595	0.688478	0.108798	0.0486559
28	N-methyl-glutamic acid	1.83286	1.49	0.855147	0.382434	1.26311	1.20182	0.374265	0.167377	1.36983	1.27537	0.354408	0.158496	1.13179	0.982004	0.550193	0.246054	1.1856	0.976454	0.43777	0.195777	1.15842	1.04129	0.285706	0.127772	0.870811	0.779994	0.194327	0.0869059	1.1676	1.07847	0.243628	0.108954	1.50685	1.68585	0.402341	0.179932	1.038	0.97454	0.450484	0.201463	1.31092	1.34204	0.28833	0.128945	1.05136	0.839605	0.695001	0.310814
29	glycerol 2-phosphate	0.950198	0.990195	0.0941208	0.0420921	0.925797	0.86769	0.154119	0.0689242	0.974797	1.00755	0.110091	0.0492342	0.852949	0.834834	0.0750726	0.0335735	0.927403	0.955808	0.0976363	0.0436643	0.840403	0.717611	0.201704	0.0902046	0.878934	0.839514	0.154512	0.0690997	1.01763	0.997097	0.14646	0.0654988	0.885869	0.805205	0.12172	0.054435	1.0649	1.09382	0.101139	0.0452308	1.06506	1.04305	0.0438324	0.0196024	0.874279	0.834743	0.15598	0.0697563
30	trans-aconitic acid	1.4964	1.1029	0.794117	0.35514	0.990055	0.959591	0.219445	0.0981388	1.16699	1.01111	0.54716	0.244697	1.12635	1.07578	0.298214	0.133365	0.986515	1.04656	0.217784	0.0973958	0.883065	0.849788	0.0934904	0.0418102	1.2544	1.33695	0.300197	0.134252	1.69594	1.548	0.623424	0.278804	1.36174	1.09465	0.530951	0.237449	1.25463	1.23223	0.346916	0.155145	1.31096	1.17351	0.702734	0.314272	1.55493	1.31385	0.907615	0.405898
31	glycerol 1-phosphate	1.13554	1.00721	0.321165	0.143629	0.866072	0.832905	0.0990808	0.0443103	1.02185	1.0241	0.219349	0.0980958	0.824782	0.817308	0.195828	0.0875768	0.871131	0.78029	0.183752	0.0821765	0.763766	0.771538	0.190105	0.0850176	0.954135	0.912673	0.121519	0.054345	0.993271	0.996143	0.146338	0.0654445	1.0855	1.18036	0.166553	0.0744846	1.02472	1.09183	0.121007	0.0541162	1.08993	1.18462	0.186316	0.0833231	0.868543	0.855231	0.203005	0.0907865
32	O-phosphoethanolamine	1.05576	0.949054	0.400069	0.178916	0.869293	0.84011	0.166893	0.0746369	0.835037	0.847842	0.223316	0.0998701	1.03312	1.06902	0.141456	0.0632609	0.624322	0.556034	0.130305	0.0582743	1.0663	1.00318	0.156797	0.0701216	0.889095	0.919584	0.0846761	0.0378683	0.982169	1.02982	0.138853	0.0620968	1.04626	1.14135	0.247372	0.110628	1.06634	1.11683	0.209925	0.0938811	0.902515	0.872864	0.126518	0.0565804	1.1347	1.03516	0.364079	0.162821
33	N-acetyl-glutamic acid	1.49712	1.34876	0.583121	0.26078	1.06706	1.03246	0.292209	0.13068	1.18885	1.19222	0.27876	0.124665	0.973645	0.904426	0.255466	0.114248	1.07251	1.05264	0.241916	0.108188	0.88113	0.95959	0.193777	0.0866596	0.924437	0.932715	0.159198	0.0711954	0.943812	0.954955	0.0621646	0.0278008	0.950073	0.999235	0.204516	0.0914625	0.865685	0.861467	0.0582409	0.0260461	0.963439	1.007	0.141255	0.063171	0.702547	0.726107	0.147304	0.0658764
34	hypoxanthine	3.78906	1.32066	5.33645	2.38653	1.05227	0.692308	0.578314	0.25863	3.68425	0.884674	6.41524	2.86898	2.20107	0.663588	3.50723	1.56848	0.652026	0.628388	0.28467	0.127308	1.67423	1.50308	0.636496	0.28465	1.5117	1.0945	0.962228	0.430321	1.61139	1.30346	0.788797	0.352761	1.73531	0.935426	1.3989	0.625609	2.38585	1.64933	1.77814	0.795206	1.43255	1.02214	1.13422	0.507237	3.17147	1.16648	4.40946	1.97197
35	3-phosphoglycerate	1.19	1.11495	0.241654	0.108071	0.978063	0.924795	0.102712	0.0459342	0.88138	0.87131	0.289038	0.129262	1.17237	1.23535	0.138537	0.0619558	0.931622	0.844672	0.193671	0.0866124	1.0515	1.19186	0.210805	0.0942749	0.695192	0.701884	0.0901846	0.0403318	0.869228	0.859613	0.197004	0.0881029	0.714734	0.713548	0.0788619	0.0352681	1.19111	1.28468	0.199515	0.0892257	0.619172	0.534918	0.25513	0.114098	1.14203	1.11263	0.297889	0.13322
36	citrate	1.05645	1.03204	0.190375	0.0851384	0.855115	0.859138	0.0704192	0.0314924	0.94969	0.9853	0.126742	0.0566807	1.149	1.18134	0.217594	0.0973108	0.891124	0.90556	0.195638	0.0874918	1.04216	1.06395	0.139421	0.062351	0.686497	0.722965	0.0844113	0.0377499	0.909372	0.926032	0.0652624	0.0291862	0.758937	0.756493	0.0785353	0.035122	1.07009	1.14862	0.154543	0.0691137	0.801224	0.777761	0.0762788	0.0341129	1.1851	1.35846	0.318954	0.142641
37	isocitrate	1.05755	1.0477	0.18271	0.0817104	0.862835	0.862074	0.0806303	0.036059	0.951548	0.995601	0.127413	0.056981	1.15526	1.18395	0.219426	0.0981304	0.89515	0.900202	0.191752	0.0857541	1.04892	1.058	0.139069	0.0621934	0.695563	0.729041	0.0882268	0.0394562	0.902826	0.91079	0.0609108	0.0272402	0.7568	0.736073	0.0736357	0.0329309	1.06318	1.14393	0.148339	0.0663391	0.807352	0.802897	0.0755305	0.0337783	1.18517	1.34963	0.312973	0.139966
38	dehydroascorbic acid	0.576584	0.608573	0.1891	0.0845679	0.402531	0.341585	0.13422	0.0600248	0.575316	0.610832	0.159009	0.0711111	0.563148	0.572873	0.088485	0.0395717	0.355546	0.332361	0.105987	0.0473987	0.801733	0.804825	0.23465	0.104939	1.28769	1.40932	0.285433	0.127649	1.47426	1.43834	0.118693	0.0530809	1.19375	1.12699	0.304333	0.136102	1.38254	1.38099	0.339787	0.151958	1.39144	1.34533	0.0756239	0.03382	1.47761	1.3978	0.366763	0.164021
39	fructose	0.921782	0.913269	0.0943085	0.042176	0.800791	0.809179	0.102622	0.045894	0.895081	0.829336	0.166283	0.0743642	1.14659	0.998892	0.305516	0.136631	0.859807	0.946548	0.154392	0.0690462	1.07434	1.05982	0.121182	0.0541941	0.795823	0.751359	0.154645	0.0691595	0.889224	0.86967	0.101886	0.045565	0.863009	0.791552	0.145551	0.0650926	1.04845	1.01358	0.30265	0.135349	0.935749	0.890424	0.193491	0.0865318	1.4905	1.27187	0.588765	0.263304
40	lysine	1.10855	1.01208	0.240967	0.107764	0.952169	0.925384	0.177346	0.0793115	0.700267	0.724264	0.163013	0.0729016	1.4305	1.29406	0.840329	0.375806	0.66629	0.69482	0.152181	0.0680573	1.39535	1.28394	0.961223	0.429872	0.96814	1.07781	0.341376	0.152668	0.935234	0.968542	0.222344	0.0994353	0.841552	0.885428	0.185006	0.0827372	1.38702	1.46753	0.47218	0.211165	0.976305	1.01956	0.250283	0.11193	2.47456	1.62231	1.69172	0.75656
41	tyrosine	1.04455	0.950125	0.367311	0.164267	0.724513	0.692506	0.159959	0.0715359	0.839691	0.801441	0.119147	0.053284	1.18582	1.28277	0.362156	0.161961	0.758553	0.657546	0.173842	0.0777445	1.35582	1.47781	0.41788	0.186882	0.92627	0.949933	0.125645	0.05619	1.0997	1.02551	0.140195	0.0626969	0.82835	0.842179	0.123533	0.0552454	1.58818	1.87136	0.444388	0.198736	0.943591	0.964985	0.0736114	0.03292	1.55179	1.54389	0.467935	0.209267
42	ascorbic acid	0.438228	0.37489	0.370237	0.165575	0.177767	0.159967	0.12632	0.0564921	0.266478	0.274883	0.153786	0.0687751	0.558538	0.270089	0.770583	0.344615	0.167855	0.12968	0.173083	0.0774053	1.90773	1.54406	1.68285	0.752593	0.640108	0.667523	0.360827	0.161367	0.911037	0.656743	0.615612	0.27531	0.58176	0.357087	0.650945	0.291111	3.06767	2.57246	2.16409	0.967812	0.806393	0.503484	0.94514	0.42268	2.52453	3.12056	2.10592	0.941794
43	pantothenic acid	1.11741	1.09494	0.136729	0.0611471	0.834632	0.867693	0.0761271	0.0340451	1.21415	1.27838	0.148878	0.0665804	1.03184	1.07133	0.137333	0.0614174	1.12278	1.13039	0.265559	0.118762	1.04264	0.997094	0.13337	0.059645	0.686544	0.650835	0.0829115	0.0370792	0.757069	0.702335	0.0829919	0.0371151	0.827384	0.804931	0.0877516	0.0392437	0.826109	0.817946	0.127241	0.0569038	0.951097	0.946236	0.0738348	0.0330199	0.926482	0.936898	0.159544	0.0713503
44	cytidine-5'-monophosphate	0.937528	0.855663	0.230945	0.103282	0.842745	0.779989	0.178573	0.0798605	1.08059	1.09971	0.104711	0.0468283	0.935458	0.910933	0.157206	0.0703046	0.923897	0.902631	0.12457	0.0557092	0.821115	0.915856	0.179859	0.0804353	0.860063	0.862571	0.16583	0.0741614	0.9523	1.01805	0.131247	0.0586955	0.902253	0.916005	0.149614	0.0669093	1.01253	0.973098	0.266282	0.119085	1.04354	1.06119	0.151045	0.0675492	0.950355	0.971483	0.141225	0.0631579
45	palmitic acid	0.94292	0.889839	0.189288	0.0846523	1.09477	1.03975	0.143269	0.0640719	1.10435	1.0845	0.365261	0.16335	1.10918	1.11436	0.0819265	0.0366386	0.959249	1.0622	0.219659	0.0982347	0.891553	0.933311	0.123642	0.0552944	0.806325	0.805254	0.0390411	0.0174597	0.866893	0.840951	0.131241	0.0586926	0.755619	0.794884	0.057819	0.0258575	0.920184	0.884153	0.118241	0.0528788	0.916134	0.960287	0.0907483	0.0405839	0.802743	0.814076	0.0381774	0.0170735
46	myo-inositol	0.957154	0.958652	0.0408597	0.018273	0.913592	0.907882	0.0299516	0.0133948	0.954462	0.956626	0.0359206	0.0160642	1.04394	1.06668	0.0654883	0.0292873	0.906898	0.891919	0.0737424	0.0329786	1.05685	1.05183	0.0493523	0.022071	0.913949	0.916858	0.0354878	0.0158706	0.945291	0.947604	0.0427186	0.0191043	0.940953	0.922473	0.0476933	0.0213291	1.05252	1.06312	0.0579796	0.0259293	0.949237	0.949211	0.0318774	0.014256	1.13697	1.18413	0.127905	0.0572009
47	ribose-5-phosphate	0.866125	0.97407	0.172357	0.0770806	0.959711	0.974403	0.0382514	0.0171065	1.12651	1.18847	0.248551	0.111156	0.812712	0.788043	0.106066	0.0474341	0.835297	0.846427	0.0924313	0.0413365	0.504621	0.539834	0.154673	0.0691718	1.00767	0.948869	0.0940386	0.0420553	1.22978	1.21609	0.209948	0.0938915	1.12882	1.14494	0.102787	0.0459678	0.842868	0.837159	0.0760526	0.0340118	1.21169	1.22137	0.121947	0.0545365	0.865852	0.823664	0.12603	0.0563624
48	norepinephrine	1.2645	1.06803	0.487189	0.217878	1.17304	1.21437	0.292336	0.130736	0.991627	1.00304	0.265428	0.118703	0.925514	0.900713	0.220773	0.0987327	0.80268	0.810322	0.190619	0.0852473	0.964772	0.948547	0.0815344	0.0364633	1.00043	1.05491	0.125546	0.056146	1.03139	1.03012	0.150769	0.0674259	1.081	1.05186	0.199989	0.0894378	0.97207	0.988498	0.282477	0.126328	0.963648	0.941579	0.144223	0.0644983	1.4956	1.34592	0.501972	0.224489
49	5-hydroxyindole-3-acetic acid	0.941654	0.936946	0.163146	0.0729613	0.625285	0.620349	0.0929965	0.0415893	0.947016	1.00518	0.163939	0.0733157	0.818164	0.78911	0.203739	0.0911148	0.90137	0.767624	0.289869	0.129634	0.929907	0.924841	0.184001	0.0822875	0.810242	0.771527	0.12697	0.0567825	0.93358	0.918517	0.142309	0.0636427	1.15269	1.26988	0.241419	0.107966	1.14045	1.22427	0.23718	0.10607	1.15806	1.12005	0.186706	0.0834977	1.31735	1.32509	0.459171	0.205348
50	oleic acid	0.912373	0.890513	0.300502	0.134388	1.18508	1.14019	0.373085	0.166849	1.11765	1.13941	0.513828	0.229791	1.17989	1.10891	0.176877	0.0791017	1.40007	1.34645	0.567484	0.253787	0.854559	0.852723	0.198312	0.0886878	0.857018	0.945317	0.213306	0.0953933	0.890914	0.886043	0.108631	0.0485811	0.732476	0.787058	0.0897753	0.0401487	0.97587	0.950437	0.0983516	0.0439842	0.974125	0.95664	0.140205	0.0627016	0.779996	0.867293	0.182693	0.0817028
51	stearic acid	0.964093	0.89101	0.208567	0.0932739	0.997582	0.993306	0.0997743	0.0446204	1.12029	0.971898	0.432408	0.193379	1.06533	1.06024	0.106079	0.0474399	0.941403	0.97479	0.136377	0.0609897	0.911315	0.901771	0.0898874	0.0401989	0.883024	0.8505	0.0614792	0.0274943	0.844975	0.790384	0.128886	0.0576394	0.794864	0.801808	0.0416706	0.0186357	0.910495	0.865966	0.109655	0.049039	0.879972	0.907042	0.09609	0.0429728	0.796613	0.791988	0.0340576	0.015231
52	glucose 6-phosphate	1.18471	1.34684	0.752473	0.336516	1.89743	1.70382	0.798153	0.356945	1.11888	1.02368	0.58988	0.263802	3.18752	3.26594	1.56145	0.698302	0.767188	0.597407	0.404095	0.180717	1.91057	1.12495	1.76859	0.790938	0.520888	0.343717	0.491786	0.219933	0.689649	0.629816	0.406566	0.181822	0.653423	0.643847	0.195633	0.0874898	0.984439	0.942206	0.171964	0.0769047	0.672793	0.452822	0.544262	0.243402	1.29417	1.15678	0.639028	0.285782
53	inosine	1.10564	0.974787	0.340167	0.152127	0.317481	0.378368	0.251189	0.112335	0.894851	0.86339	0.371272	0.166038	0.899992	0.560456	0.959191	0.428963	0.653404	0.528519	0.378139	0.169109	1.10226	1.1805	0.375447	0.167905	1.02639	0.889576	0.235838	0.10547	1.2674	1.28075	0.315231	0.140976	0.901177	0.851805	0.117581	0.052584	1.55953	1.40188	0.572107	0.255854	1.22301	1.09167	0.545143	0.243795	0.810093	0.951992	0.419294	0.187514
54	adenosine	1.31625	1.20394	0.620728	0.277598	0.635928	0.714257	0.177422	0.0793454	1.68121	1.22551	1.19796	0.535744	1.10334	0.540273	1.17821	0.526909	0.875291	0.832803	0.472083	0.211122	1.01274	0.961735	0.357913	0.160064	0.84414	0.871925	0.292907	0.130992	1.40832	1.52776	0.383949	0.171707	1.04105	1.10518	0.405449	0.181322	1.69072	1.63462	0.714772	0.319656	1.18224	1.20071	0.412042	0.184271	1.11713	0.972885	0.378478	0.169261
55	sucrose	0.654639	0.626786	0.123001	0.0550078	0.55788	0.514421	0.113304	0.0506712	0.896033	0.626436	0.668268	0.298858	1.39433	1.29007	0.628737	0.28118	1.34386	0.77703	1.39036	0.621787	0.699325	0.547758	0.257518	0.115166	2.19351	0.718591	3.07388	1.37468	0.953596	0.648227	0.765532	0.342356	0.745949	0.751447	0.1858	0.0830923	0.796019	0.567921	0.541459	0.242148	0.782457	0.82292	0.242984	0.108666	0.552503	0.501889	0.190016	0.0849777
56	5'-Deoxy-5'-(methylthio)adenosine	1.0962	0.887255	0.643056	0.287583	0.994642	0.965882	0.154601	0.0691395	0.950784	0.832296	0.360261	0.161114	1.14941	1.03429	0.301605	0.134882	0.786422	0.763358	0.0724635	0.0324067	1.0014	0.964395	0.385126	0.172234	1.03109	1.00101	0.132508	0.0592592	0.999161	1.02945	0.141828	0.0634275	0.921276	0.94764	0.218193	0.0975787	0.96749	0.928427	0.280564	0.125472	0.804246	0.738859	0.170764	0.0763678	1.07814	0.898562	0.680516	0.304336
57	guanosine	1.20141	0.943721	0.443491	0.198335	1.0829	0.841222	0.505164	0.225916	0.922425	0.936586	0.452176	0.202219	1.37407	0.924579	1.07574	0.481086	0.632613	0.635267	0.44592	0.199422	0.946681	0.961993	0.388882	0.173913	1.11211	1.09529	0.59831	0.267572	1.3403	1.18231	0.345606	0.15456	1.188	0.864889	0.730214	0.326561	1.24503	1.19858	0.325229	0.145447	1.14303	1.01176	0.386017	0.172632	0.974931	0.886468	0.316913	0.141728
58	cholesterol	1.04686	0.841312	0.793186	0.354723	1.04741	0.791995	0.918708	0.410859	0.837839	0.865225	0.531227	0.237572	1.73475	1.27247	0.92289	0.412729	2.17561	0.675812	3.39502	1.5183	0.582136	0.506719	0.204732	0.091559	0.662077	0.563942	0.339163	0.151678	0.805441	0.746954	0.329068	0.147163	0.974194	0.67502	0.507844	0.227115	0.499732	0.500461	0.150787	0.067434	0.85278	1.04505	0.346443	0.154934	0.528411	0.410891	0.365524	0.163467

## Sheet: Lumbar (log10) Data Summary
	metabolite	Presymptomatic								Onset								Late Stage								Presymptomatic								Onset								Late Stage
		C57-NTG				C57-G93A				C57-NTG				C57-G93A				C57-NTG				C57-G93A				129S-NTG				129S-G93A				129S-NTG				129S-G93A				129S-NTG				129S-G93A
		Mean	Median	S.D.	S.E.M.	Mean	Median	S.D.	S.E.M.	Mean	Median	S.D.	S.E.M.	Mean	Median	S.D.	S.E.M.	Mean	Median	S.D.	S.E.M.	Mean	Median	S.D.	S.E.M.	Mean	Median	S.D.	S.E.M.	Mean	Median	S.D.	S.E.M.	Mean	Median	S.D.	S.E.M.	Mean	Median	S.D.	S.E.M.	Mean	Median	S.D.	S.E.M.	Mean	Median	S.D.	S.E.M.
1	lactate	-0.135342	-0.132187	0.0974525	0.0435821	-0.108085	-0.13384	0.0462504	0.0206838	-0.197021	-0.192251	0.0575266	0.0287633	-0.134533	-0.179161	0.0941901	0.0421231	-0.160382	-0.161858	0.0419005	0.0187385	-0.18003	-0.197068	0.0326311	0.0145931	-0.221343	-0.199091	0.059077	0.02642	-0.212808	-0.21496	0.0214522	0.00959373	-0.156714	-0.14717	0.107362	0.0480137	-0.116479	-0.127022	0.122899	0.0549622	-0.220484	-0.145532	0.170325	0.0761718	-0.144214	-0.13835	0.0570361	0.0255073
2	norvaline	-0.316159	-0.233548	0.282144	0.126179	-0.454079	-0.304812	0.228459	0.10217	-0.202322	-0.214171	0.0530453	0.0265227	-0.396274	-0.356616	0.204025	0.0912428	-0.203487	-0.178353	0.0826162	0.0369471	-0.177845	-0.140419	0.0702575	0.0314201	-0.127394	-0.163579	0.0723931	0.0323752	-0.161854	-0.20021	0.0925148	0.0413739	-0.350343	-0.224006	0.343132	0.153453	-0.265039	-0.246601	0.190733	0.0852986	-0.328509	-0.235396	0.2621	0.117214	-0.191654	-0.198224	0.0788901	0.0352807
3	oxalic acid	-0.346438	-0.334746	0.0801891	0.0358616	-0.404183	-0.431493	0.0957803	0.0428342	-0.340472	-0.325959	0.104537	0.0522684	-0.394776	-0.416525	0.0834337	0.0373127	-0.318629	-0.294677	0.0853937	0.0381892	-0.239903	-0.236253	0.144733	0.0647268	-0.246816	-0.310735	0.121261	0.0542294	-0.352007	-0.362018	0.051947	0.0232314	-0.397028	-0.421317	0.260261	0.116392	-0.38831	-0.317808	0.133737	0.059809	-0.297997	-0.243952	0.168766	0.0754746	-0.332226	-0.280408	0.0976602	0.043675
4	norleucine	-0.184482	-0.181058	0.0359733	0.0160877	-0.258058	-0.222347	0.0942137	0.0421336	-0.185071	-0.169278	0.0423347	0.0211673	-0.137491	-0.132064	0.0673309	0.0301113	-0.210926	-0.210832	0.0500406	0.0223788	-0.172982	-0.149294	0.0473216	0.0211629	-0.107758	-0.101785	0.0474342	0.0212132	-0.16524	-0.136993	0.0789672	0.0353152	-0.166089	-0.184696	0.0659428	0.0294905	-0.0798731	-0.0834653	0.0699251	0.0312715	-0.12592	-0.107759	0.0640054	0.0286241	-0.160835	-0.159813	0.0669781	0.0299535
5	isoleucine	-0.302114	-0.189934	0.196912	0.0880618	-0.500541	-0.525394	0.135805	0.0607336	-0.261444	-0.204026	0.156194	0.078097	-0.308425	-0.39348	0.180048	0.0805198	-0.145099	-0.127763	0.0799565	0.0357576	-0.263812	-0.171682	0.225006	0.100626	-0.150962	-0.0923654	0.128966	0.0576753	-0.272336	-0.215266	0.181429	0.0811373	-0.305818	-0.19577	0.231335	0.103456	-0.211585	-0.219962	0.15796	0.0706418	-0.285764	-0.222106	0.170521	0.0762593	-0.223509	-0.156733	0.18139	0.0811199
6	valine	-0.208745	-0.225594	0.047451	0.0212207	-0.226572	-0.237207	0.0765816	0.0342483	-0.242677	-0.22914	0.0618946	0.0309473	-0.197195	-0.244316	0.102889	0.0460135	-0.189874	-0.173193	0.0554426	0.0247947	-0.211914	-0.194738	0.0579366	0.02591	-0.182444	-0.202123	0.0583453	0.0260928	-0.189031	-0.180335	0.0569109	0.0254513	-0.132959	-0.158231	0.0777431	0.0347678	-0.125523	-0.0932869	0.0898078	0.0401632	-0.181661	-0.216343	0.0704735	0.0315167	-0.174545	-0.180079	0.0591467	0.0264512
7	urea	-0.0553002	-0.0575337	0.0527636	0.0235966	0.0137549	0.0153484	0.0205859	0.0092063	-0.096408	-0.0915966	0.0835906	0.0417953	0.0321877	0.0215409	0.0766044	0.0342585	-0.0457432	-0.0506208	0.0333643	0.014921	-0.0804653	-0.0723205	0.0247005	0.0110464	-0.0549511	-0.0574185	0.0333538	0.0149163	-0.0641161	-0.0658657	0.0312469	0.013974	-0.0670101	-0.0755781	0.0689785	0.0308481	-0.048117	-0.0662981	0.0667881	0.0298685	-0.103897	-0.0387685	0.158248	0.0707707	-0.0576807	-0.0472487	0.0309205	0.0138281
8	glycine	-0.175569	-0.16293	0.0569205	0.0254556	-0.195526	-0.215897	0.0801818	0.0358584	-0.177573	-0.182901	0.0407458	0.0203729	-0.212608	-0.200996	0.0432875	0.0193588	-0.181871	-0.193178	0.0360386	0.016117	-0.231306	-0.225488	0.0531768	0.0237814	-0.205822	-0.169423	0.0670916	0.0300043	-0.205642	-0.197453	0.0223007	0.00997318	-0.229651	-0.23452	0.0980491	0.0438489	-0.238238	-0.206943	0.0852889	0.0381424	-0.221981	-0.146155	0.143856	0.0643344	-0.257966	-0.238989	0.0595197	0.026618
9	succinate	-0.239288	-0.223591	0.0674401	0.0301601	-0.238744	-0.224808	0.0391002	0.0174862	-0.256784	-0.245779	0.1127	0.0563502	-0.296601	-0.300917	0.03801	0.0169986	-0.196507	-0.169734	0.0525201	0.0234877	-0.270475	-0.263872	0.075159	0.0336121	-0.244961	-0.221676	0.0724666	0.032408	-0.265409	-0.271074	0.0592825	0.0265119	-0.349023	-0.328462	0.108275	0.0484222	-0.245633	-0.272755	0.0859371	0.0384323	-0.333687	-0.309105	0.0871954	0.038995	-0.329198	-0.298698	0.0900361	0.0402654
10	glyceric acid	-1.03266	-1.0354	0.101453	0.0453711	-1.05667	-1.1059	0.126293	0.0564798	-1.19468	-1.2042	0.0711352	0.0355676	-1.08991	-0.979586	0.169539	0.0758201	-1.18074	-1.1833	0.115546	0.051674	-0.870856	-0.905355	0.111516	0.0498716	0.0571136	0.0502235	0.0189169	0.00845988	0.0140899	0.000426756	0.029422	0.0131579	0.00560486	0.0656529	0.114899	0.0513845	-0.014149	0.000225719	0.0638798	0.0285679	0.00975266	0.0398039	0.0679996	0.0304103	-0.0183709	0.00477105	0.0399999	0.0178885
11	porphyrin	0.0483149	0.0961961	0.159462	0.0713135	0.108642	0.101521	0.15652	0.0699978	-0.0522362	-0.0438205	0.143721	0.0718605	-0.00858824	-0.0508592	0.281512	0.125896	-0.135955	-0.131493	0.0555352	0.0248361	-0.0146222	-0.0553391	0.0939097	0.0419977	-0.106443	-0.110324	0.112836	0.050462	-0.0940415	-0.0630073	0.0866813	0.0387651	-0.169302	-0.213963	0.203819	0.0911507	-0.161291	-0.137565	0.155014	0.0693242	-0.174895	-0.112506	0.155917	0.0697283	-0.165212	-0.230754	0.189143	0.0845874
12	uracil	-0.17276	-0.176383	0.0593745	0.0265531	-0.211738	-0.204367	0.0580613	0.0259658	-0.160397	-0.168399	0.0531532	0.0265766	-0.246164	-0.245142	0.0259892	0.0116227	-0.220997	-0.204676	0.0610157	0.0272871	-0.206991	-0.213326	0.0270188	0.0120832	-0.138408	-0.146023	0.0386253	0.0172738	-0.134579	-0.138124	0.0342055	0.0152972	-0.197556	-0.146862	0.101036	0.0451848	-0.124177	-0.143629	0.0863856	0.0386328	-0.192116	-0.119194	0.137178	0.0613479	-0.222991	-0.21324	0.0363137	0.01624
13	fumarate	-0.228025	-0.215005	0.0473534	0.0211771	-0.16318	-0.171269	0.0539286	0.0241176	-0.215446	-0.238618	0.0867772	0.0433886	-0.212544	-0.180196	0.0747834	0.0334442	-0.153611	-0.135611	0.0396033	0.0177111	-0.343781	-0.315721	0.0930565	0.0416161	-0.31209	-0.322417	0.0923717	0.0413099	-0.276143	-0.283845	0.0312668	0.0139829	-0.320929	-0.287017	0.0792282	0.0354319	-0.294328	-0.304544	0.097713	0.0436986	-0.355332	-0.339946	0.0824664	0.0368801	-0.315282	-0.325364	0.0760361	0.0340044
14	threonine	-0.420202	-0.389364	0.122149	0.0546268	-0.479067	-0.477027	0.117751	0.05266	-0.318767	-0.316635	0.0603447	0.0301723	-0.370529	-0.35514	0.111735	0.0499696	-0.325359	-0.304078	0.0589271	0.026353	-0.345415	-0.344329	0.0571169	0.0255435	-0.314445	-0.3146	0.0676785	0.0302668	-0.375751	-0.391462	0.0636077	0.0284462	-0.392497	-0.358216	0.126177	0.056428	-0.305184	-0.331383	0.0975369	0.0436198	-0.343505	-0.310232	0.122358	0.0547202	-0.230907	-0.248056	0.114829	0.0513531
15	thymine	-0.201434	-0.219314	0.106624	0.0476837	-0.185326	-0.17972	0.0928936	0.0415433	-0.125837	-0.157968	0.0981477	0.0490738	-0.256829	-0.288249	0.0543228	0.0242939	-0.174369	-0.150726	0.041142	0.0183993	-0.181816	-0.195456	0.0455764	0.0203824	-0.194267	-0.179449	0.0516961	0.0231192	-0.178226	-0.175688	0.0326141	0.0145855	-0.241737	-0.172715	0.162902	0.0728519	-0.223766	-0.250083	0.057128	0.0255484	-0.298738	-0.236252	0.118881	0.0531653	-0.196073	-0.192987	0.0627057	0.0280428
16	6-hydroxyhexanoic acid	-0.371982	-0.24263	0.299125	0.133773	-0.582842	-0.587801	0.189266	0.0846424	-0.448173	-0.42768	0.0714648	0.0357324	-0.460341	-0.643046	0.304135	0.136013	-0.423963	-0.441549	0.164476	0.0735558	-0.420676	-0.428209	0.163818	0.0732618	-0.209087	-0.149436	0.149947	0.0670583	-0.311388	-0.272194	0.0882814	0.0394807	-0.467634	-0.437834	0.272925	0.122056	-0.530547	-0.57286	0.140864	0.0629961	-0.486247	-0.367851	0.280796	0.125576	-0.431052	-0.456772	0.153883	0.0688184
17	Beta-alanine	-0.438892	-0.512123	0.193068	0.0863427	-0.456986	-0.495115	0.104398	0.0466884	-0.497585	-0.531276	0.10218	0.0510898	-0.500969	-0.535246	0.172632	0.0772032	-0.431997	-0.43048	0.0586644	0.0262355	-0.592456	-0.549519	0.139625	0.0624424	-0.563985	-0.511836	0.119116	0.0532703	-0.562959	-0.583389	0.0601088	0.0268815	-0.473522	-0.478654	0.165509	0.0740181	-0.513457	-0.51978	0.19794	0.0885216	-0.47215	-0.408486	0.128577	0.0575015	-0.639844	-0.665333	0.0944714	0.0422489
18	trans-3-hydroxy-proline	-0.539745	-0.527784	0.201827	0.0902597	-0.623061	-0.538338	0.175473	0.0784737	-0.651804	-0.645603	0.0789812	0.0394906	-0.669797	-0.602555	0.143863	0.0643377	-0.736034	-0.693251	0.184594	0.0825528	-0.724156	-0.697591	0.174725	0.0781394	-0.546218	-0.633138	0.201726	0.0902144	-0.562946	-0.474536	0.173824	0.0777365	-0.433066	-0.464863	0.174781	0.0781643	-0.538281	-0.590376	0.188473	0.0842875	-0.62848	-0.634261	0.13053	0.0583748	-0.556387	-0.492837	0.182336	0.081543
19	1-methylnicotinamide	-0.169897	-0.156947	0.0278788	0.0124678	-0.349729	-0.321751	0.143729	0.0642777	-0.167992	-0.164628	0.187703	0.0938517	-0.345803	-0.407089	0.215657	0.0964447	-0.251746	-0.272184	0.0823325	0.0368202	-0.219285	-0.33405	0.225492	0.100843	-0.329721	-0.323443	0.125492	0.0561219	-0.30274	-0.306365	0.0707169	0.0316256	-0.450373	-0.440681	0.237343	0.106143	-0.443056	-0.448982	0.138669	0.0620146	-0.448604	-0.427406	0.072525	0.0324342	-0.451983	-0.484985	0.0899072	0.0402077
20	malate	-0.147696	-0.110894	0.0611135	0.0273308	-0.166952	-0.13606	0.0561863	0.0251273	-0.16866	-0.157681	0.0547023	0.0273511	-0.214706	-0.211947	0.00757076	0.00338575	-0.152829	-0.136298	0.034366	0.015369	-0.250569	-0.249791	0.0561943	0.0251309	-0.282777	-0.273132	0.0614983	0.0275029	-0.263015	-0.252907	0.0240733	0.0107659	-0.350409	-0.308061	0.110217	0.0492904	-0.292891	-0.31647	0.0629427	0.0281488	-0.350175	-0.325449	0.0458128	0.0204881	-0.333965	-0.343903	0.050864	0.0227471
21	pyroglutamate	-0.0928267	-0.0920172	0.0219961	0.00983697	-0.0935787	-0.101592	0.0398251	0.0178103	-0.108225	-0.111295	0.0229323	0.0114661	-0.0975353	-0.0948475	0.0337963	0.0151142	-0.0897167	-0.0890698	0.0107972	0.00482865	-0.112846	-0.108588	0.0231923	0.0103719	-0.0870795	-0.0947527	0.0343303	0.015353	-0.089581	-0.100622	0.022754	0.0101759	-0.117441	-0.0601592	0.108574	0.0485559	-0.103683	-0.0932682	0.0316872	0.014171	-0.14655	-0.083288	0.144883	0.0647938	-0.121592	-0.148821	0.0550294	0.0246099
22	4-guanidinobutyric acid	-0.914349	-0.864171	0.191958	0.0858461	-1.21516	-1.11087	0.394646	0.176491	-0.713896	-0.731186	0.284396	0.142198	-1.01266	-0.96798	0.411078	0.18384	-0.861337	-0.847692	0.111545	0.0498845	-0.831612	-0.84733	0.317979	0.142204	-0.824565	-0.829318	0.36572	0.163555	-1.10727	-1.14923	0.165282	0.0739162	-1.01016	-1.01155	0.158945	0.0710823	-1.26052	-1.23513	0.396564	0.177349	-0.957139	-1.03116	0.495277	0.221495	-1.31086	-1.44569	0.32903	0.147146
23	glutamine	-0.217795	-0.20684	0.0933411	0.0417434	-0.22727	-0.206995	0.102276	0.0457393	-0.128476	-0.127398	0.0671636	0.0335818	-0.114089	-0.0964019	0.0405386	0.0181294	-0.170572	-0.171904	0.0762523	0.0341011	-0.158352	-0.190594	0.0519281	0.0232229	-0.186692	-0.174743	0.0298775	0.0133616	-0.250603	-0.255786	0.0456057	0.0203955	-0.234456	-0.190247	0.158942	0.0710811	-0.163963	-0.192467	0.056386	0.0252166	-0.233991	-0.20401	0.103086	0.0461013	-0.124743	-0.116841	0.07595	0.0339659
24	phenylalanine	-0.267315	-0.224705	0.142202	0.0635948	-0.252715	-0.243047	0.115627	0.05171	-0.214316	-0.187548	0.079598	0.039799	-0.276206	-0.270215	0.0835333	0.0373572	-0.208372	-0.187191	0.075149	0.0336077	-0.216793	-0.225974	0.0837557	0.0374567	-0.239446	-0.233856	0.0308471	0.0137953	-0.228965	-0.208081	0.0552911	0.0247269	-0.291682	-0.246914	0.191404	0.0855983	-0.188268	-0.188876	0.0622478	0.0278381	-0.30976	-0.31168	0.0998823	0.0446687	-0.138821	-0.135815	0.0400725	0.017921
25	creatinine	-0.156815	-0.0561655	0.190473	0.0851821	-0.162911	-0.0695354	0.185309	0.0828725	-0.201765	-0.213243	0.161999	0.0809993	-0.110944	-0.000583112	0.231343	0.10346	-0.17902	-0.117114	0.103725	0.046387	-0.16851	-0.0696392	0.17199	0.0769163	-0.0975578	-0.0765234	0.16506	0.0738172	-0.0854426	-0.0412398	0.153975	0.0688595	-0.120904	-0.131676	0.135096	0.0604166	-0.193145	-0.161383	0.164369	0.0735081	-0.244802	-0.266386	0.0905174	0.0404806	-0.165424	-0.121885	0.145679	0.0651498
26	alpha-ketoglutarate	-0.203519	-0.158869	0.0849896	0.0380085	-0.244724	-0.238459	0.0730403	0.0326646	-0.163766	-0.163952	0.0368608	0.0184304	-0.243689	-0.250944	0.0215512	0.00963798	-0.108841	-0.102633	0.0661061	0.0295635	-0.223871	-0.20977	0.0629343	0.0281451	-0.450512	-0.463551	0.0684312	0.0306034	-0.472388	-0.479312	0.0385211	0.0172271	-0.50252	-0.450995	0.121262	0.05423	-0.418068	-0.420745	0.0243245	0.0108782	-0.444771	-0.462315	0.0503419	0.0225136	-0.405336	-0.417509	0.0541007	0.0241946
27	phosphoenolpyruvic acid	-0.267631	-0.253544	0.193795	0.0866677	-0.366029	-0.228766	0.21363	0.095538	-0.416441	-0.422833	0.130461	0.0652303	-0.350364	-0.338072	0.0795218	0.0355632	-0.0673137	-0.104995	0.11288	0.0504814	-0.270134	-0.328435	0.257538	0.115175	-0.489212	-0.410121	0.209955	0.0938947	-0.293545	-0.254985	0.155113	0.0693688	-0.628732	-0.660848	0.17984	0.080427	-0.259711	-0.197859	0.363452	0.162541	-0.676632	-0.725038	0.0875824	0.039168	-0.525558	-0.570982	0.134919	0.0603375
28	3-hydroxy-3-methylglutaric acid	-0.470045	-0.426309	0.131474	0.058797	-0.503331	-0.546181	0.100656	0.0450147	-0.406458	-0.401974	0.0577986	0.0288993	-0.546201	-0.545099	0.0636209	0.0284521	-0.375601	-0.39487	0.0499238	0.0223266	-0.524938	-0.500762	0.103019	0.0460713	-0.0522434	-0.054334	0.0305618	0.0136677	-0.0848935	-0.103453	0.0691888	0.0309422	-0.176621	-0.104635	0.142888	0.0639013	-0.210198	-0.207771	0.0904252	0.0404394	-0.100565	-0.0906655	0.103458	0.046268	-0.296683	-0.332217	0.11131	0.0497792
29	N-acetyl-aspartic acid	-0.196068	-0.178045	0.0487857	0.0218176	-0.207512	-0.203364	0.038589	0.0172575	-0.159936	-0.166959	0.0205675	0.0102837	-0.248717	-0.25767	0.0293541	0.0131275	-0.139755	-0.143532	0.025014	0.0111866	-0.271541	-0.239359	0.0755913	0.0338054	-0.170844	-0.179637	0.0218911	0.00979001	-0.202849	-0.205987	0.0209063	0.0093496	-0.207517	-0.142635	0.102259	0.0457316	-0.251299	-0.267748	0.0839794	0.0375567	-0.227868	-0.175181	0.0853005	0.0381475	-0.361681	-0.390779	0.11554	0.0516709
30	asparagine	-0.591446	-0.585723	0.251283	0.112377	-0.671231	-0.741568	0.203914	0.0911931	-0.402169	-0.354397	0.152112	0.0760559	-0.61581	-0.557151	0.224229	0.100278	-0.368638	-0.284837	0.178127	0.0796609	-0.475442	-0.375474	0.239828	0.107254	-0.375994	-0.337764	0.201806	0.0902502	-0.384166	-0.320717	0.165284	0.0739171	-0.523605	-0.53674	0.225939	0.101043	-0.560035	-0.493318	0.266092	0.119	-0.485954	-0.505172	0.0726037	0.0324694	-0.776722	-0.812111	0.213278	0.095381
31	N-methyl-glutamic acid	0.0601064	0.0879927	0.0613146	0.0274207	0.0138119	0.0185229	0.0652754	0.029192	-0.0631912	-0.0533749	0.0489175	0.0244587	-0.121218	-0.167611	0.136267	0.0609403	0.0645022	0.155466	0.162142	0.0725121	-0.075328	-0.0665896	0.0855072	0.03824	-0.128269	-0.114396	0.129469	0.0579002	-0.126887	-0.125671	0.0551923	0.0246828	-0.0767173	-0.0178997	0.189836	0.0848972	-0.316741	-0.3376	0.211443	0.0945604	-0.0313257	-0.0161641	0.0768267	0.0343579	-0.438937	-0.559784	0.246044	0.110034
32	glycerol 2-phosphate	-0.492237	-0.471179	0.0490146	0.02192	-0.496904	-0.541194	0.0691438	0.0309221	-0.500094	-0.501647	0.110592	0.0552962	-0.518401	-0.503099	0.0322844	0.014438	-0.439672	-0.431406	0.0463893	0.0207459	-0.574712	-0.558406	0.0823747	0.0368391	-0.419754	-0.426772	0.0340206	0.0152145	-0.436532	-0.422295	0.0260246	0.0116385	-0.479659	-0.430787	0.0969187	0.0433434	-0.438883	-0.43485	0.0473551	0.0211779	-0.496905	-0.469678	0.0994579	0.0444789	-0.458627	-0.464852	0.110584	0.0494547
33	putrescine	-0.342809	-0.346019	0.0397856	0.0177927	-0.414864	-0.440994	0.0775783	0.0346941	-0.313639	-0.284474	0.0768448	0.0384224	-0.322642	-0.324072	0.0790981	0.0353738	-0.254394	-0.241173	0.0981829	0.0439087	-0.349616	-0.359947	0.0995945	0.04454	-0.405373	-0.369383	0.129601	0.0579591	-0.4562	-0.477164	0.100919	0.0451322	-0.404439	-0.329827	0.138838	0.0620904	-0.352421	-0.325407	0.0820354	0.0366873	-0.42958	-0.418468	0.0985755	0.0440843	-0.197891	-0.261728	0.196155	0.0877232
34	trans-aconitic acid	-0.418768	-0.417478	0.119294	0.0533501	-0.484768	-0.492972	0.0827887	0.0370242	-0.372589	-0.376984	0.0821072	0.0410536	-0.463571	-0.452948	0.0993475	0.0444296	-0.357788	-0.353615	0.0657769	0.0294163	-0.43829	-0.443004	0.0354635	0.0158598	-0.359508	-0.357997	0.0806226	0.0360555	-0.389339	-0.415235	0.0706937	0.0316152	-0.42451	-0.372022	0.141089	0.0630968	-0.31647	-0.340344	0.0564761	0.0252569	-0.396766	-0.382876	0.0416275	0.0186164	-0.256169	-0.244517	0.0534585	0.0239074
35	glycerol 1-phosphate	-0.152439	-0.144063	0.0281908	0.0126073	-0.131843	-0.123566	0.0188062	0.00841037	-0.200383	-0.192878	0.092165	0.0460825	-0.169339	-0.150081	0.0510068	0.0228109	-0.138006	-0.132497	0.0185659	0.00830293	-0.251589	-0.251219	0.0685555	0.0306589	-0.13219	-0.128269	0.0148754	0.00665246	-0.131161	-0.139165	0.0390439	0.0174609	-0.138343	-0.101261	0.0910276	0.0407088	-0.131669	-0.153667	0.0625509	0.0279736	-0.17223	-0.110492	0.132085	0.05907	-0.171565	-0.147973	0.0641952	0.028709
36	O-phosphoethanolamine	-0.312359	-0.316328	0.0672901	0.030093	-0.285677	-0.260285	0.0733875	0.0328199	-0.326231	-0.33423	0.0377121	0.0188561	-0.222687	-0.205584	0.0714876	0.0319702	-0.324548	-0.330426	0.0414268	0.0185266	-0.201758	-0.211601	0.0325224	0.0145444	-0.143478	-0.147616	0.0456739	0.020426	-0.177208	-0.179451	0.024958	0.0111616	-0.212136	-0.198992	0.0770285	0.0344482	-0.171746	-0.179011	0.0281933	0.0126084	-0.25809	-0.185454	0.130891	0.0585362	-0.164216	-0.14823	0.0641175	0.0286742
37	N-acetyl-glutamic acid	-0.211092	-0.184716	0.0764617	0.0341947	-0.231797	-0.225211	0.0529538	0.0236817	-0.211513	-0.21923	0.0220472	0.0110236	-0.297813	-0.287985	0.0269081	0.0120337	-0.159632	-0.146692	0.0390289	0.0174543	-0.307596	-0.271496	0.10811	0.0483482	-0.267907	-0.282354	0.0345659	0.0154583	-0.291203	-0.294493	0.022376	0.0100069	-0.342012	-0.287012	0.105941	0.0473785	-0.347253	-0.372094	0.0644741	0.0288337	-0.330445	-0.306116	0.0671316	0.0300222	-0.448721	-0.46937	0.119349	0.0533743
38	citrate	-0.299237	-0.297681	0.0521316	0.023314	-0.322673	-0.296618	0.0790329	0.0353446	-0.247502	-0.239934	0.0384757	0.0192378	-0.286013	-0.278631	0.0401818	0.0179698	-0.243567	-0.244219	0.0303541	0.0135748	-0.255593	-0.235778	0.0647021	0.0289357	-0.337002	-0.304013	0.0705082	0.0315322	-0.30253	-0.316702	0.0342019	0.0152956	-0.391091	-0.317213	0.138494	0.0619364	-0.282277	-0.258515	0.0723792	0.0323689	-0.325005	-0.324124	0.0828582	0.0370553	-0.20943	-0.224957	0.0881773	0.0394341
39	isocitrate	-0.297357	-0.2914	0.0550462	0.0246174	-0.325293	-0.299139	0.0847207	0.0378882	-0.243718	-0.238162	0.0351361	0.017568	-0.286209	-0.275026	0.0411893	0.0184204	-0.24208	-0.242855	0.0315348	0.0141028	-0.252726	-0.235189	0.0656159	0.0293443	-0.331251	-0.293287	0.0709943	0.0317496	-0.299867	-0.316057	0.0364576	0.0163043	-0.391064	-0.325042	0.140168	0.062685	-0.282661	-0.259676	0.0778819	0.0348299	-0.321908	-0.323169	0.0845578	0.0378154	-0.2072	-0.224109	0.0898646	0.0401887
40	adenine	-0.209168	-0.214579	0.0213903	0.00956602	-0.223947	-0.231915	0.0330089	0.014762	-0.210468	-0.199568	0.0391909	0.0195954	-0.21725	-0.208855	0.047783	0.0213692	-0.215417	-0.196666	0.0427798	0.0191317	-0.222722	-0.23375	0.0319467	0.014287	-0.195328	-0.190576	0.0128433	0.00574368	-0.212482	-0.211243	0.0189197	0.00846114	-0.249839	-0.226002	0.0898704	0.0401912	-0.196498	-0.214369	0.0529441	0.0236773	-0.24217	-0.211022	0.0849356	0.0379844	-0.206774	-0.210642	0.0454018	0.0203043
41	fructose	-0.100459	-0.0925806	0.138048	0.0617368	-0.0337633	-0.0232921	0.0375081	0.0167741	-0.0548624	-0.0902844	0.0945101	0.047255	0.0367326	0.0103586	0.127727	0.0571212	-0.0295375	-0.0127904	0.106565	0.0476575	0.0674652	0.0835786	0.0897796	0.0401507	-0.0956436	-0.105153	0.163318	0.0730382	-0.0517824	-0.0922876	0.093706	0.0419066	-0.191771	-0.236246	0.170584	0.0762875	-0.114317	-0.0955903	0.0909562	0.0406768	-0.106003	-0.0874038	0.0727419	0.0325312	0.0960235	0.022096	0.212069	0.09484
42	dehydroascorbic acid	-0.224045	-0.166418	0.114575	0.0512395	-0.203836	-0.174819	0.0678369	0.0303376	-0.169353	-0.18201	0.0580654	0.0290327	-0.163686	-0.175525	0.0451605	0.0201964	-0.151976	-0.146814	0.0829741	0.0371071	-0.208665	-0.219806	0.0554026	0.0247768	-0.146408	-0.124773	0.156038	0.0697821	-0.159134	-0.172124	0.0472568	0.0211339	-0.142834	-0.119419	0.0791487	0.0353964	-0.0628273	-0.0633681	0.0255627	0.011432	-0.205562	-0.167196	0.129474	0.0579027	-0.0799885	-0.0653156	0.102009	0.0456199
43	tyrosine	-0.237883	-0.263459	0.0618994	0.0276823	-0.328066	-0.327829	0.0552715	0.0247181	-0.329663	-0.341582	0.0402443	0.0201222	-0.215814	-0.193899	0.105091	0.0469982	-0.315994	-0.30734	0.0867332	0.0387883	-0.243947	-0.202831	0.107641	0.0481383	-0.310301	-0.34884	0.0577837	0.0258417	-0.288773	-0.276594	0.0358737	0.0160432	-0.331498	-0.337854	0.0704728	0.0315164	-0.209622	-0.232334	0.104558	0.0467599	-0.31661	-0.341076	0.0953549	0.042644	-0.203229	-0.1886	0.0989813	0.0442658
44	ascorbic acid	-0.665514	-0.613867	0.256103	0.114533	-0.871953	-0.868512	0.149497	0.0668572	-0.677277	-0.654388	0.0811893	0.0405946	-0.686973	-0.676592	0.189427	0.0847143	-0.631481	-0.528234	0.244565	0.109373	-0.632468	-0.629523	0.146614	0.065568	-0.866573	-0.852845	0.086722	0.0387833	-0.818422	-0.853255	0.278771	0.12467	-0.964881	-0.903255	0.234939	0.105068	-0.616054	-0.585744	0.109657	0.0490402	-0.892384	-0.893824	0.144909	0.0648052	-0.783657	-0.657235	0.216486	0.0968154
45	pantothenic acid	-0.203357	-0.182478	0.0611766	0.027359	-0.224892	-0.221941	0.0813143	0.0363649	-0.0974204	-0.0924164	0.046087	0.0230435	-0.150344	-0.160467	0.039045	0.0174615	-0.0628067	-0.0802382	0.0462497	0.0206835	-0.133858	-0.122523	0.0496306	0.0221955	-0.293946	-0.294544	0.0431782	0.0193099	-0.307669	-0.302564	0.0545472	0.0243942	-0.322006	-0.309324	0.13957	0.0624176	-0.287842	-0.28966	0.047339	0.0211707	-0.281968	-0.280848	0.0823584	0.0368318	-0.225309	-0.223431	0.0406745	0.0181902
46	xanthine	-0.244901	-0.201306	0.0756246	0.0338203	-0.343942	-0.354646	0.0425911	0.0190473	-0.218344	-0.241424	0.141397	0.0706986	-0.239345	-0.282524	0.113233	0.0506394	-0.317291	-0.300734	0.0923914	0.0413187	-0.12344	-0.115944	0.0661781	0.0295957	-0.206607	-0.232572	0.0693434	0.0310113	-0.170275	-0.159321	0.0683066	0.0305476	-0.301	-0.301041	0.0757124	0.0338596	-0.0981056	-0.140179	0.112986	0.050529	-0.274394	-0.25059	0.115659	0.0517241	-0.204109	-0.217268	0.0606336	0.0271162
47	cytidine-5'-monophosphate	-0.368773	-0.341607	0.0761141	0.0340392	-0.359804	-0.377023	0.0438085	0.0195918	-0.386086	-0.402011	0.0773424	0.0386712	-0.365769	-0.396375	0.0715391	0.0319933	-0.262447	-0.250327	0.0631933	0.0282609	-0.323663	-0.314768	0.0318552	0.0142461	-0.289897	-0.266776	0.061637	0.0275649	-0.26775	-0.256003	0.0611107	0.0273295	-0.343273	-0.319214	0.148291	0.0663178	-0.245794	-0.238206	0.0312934	0.0139948	-0.334277	-0.353568	0.0955114	0.042714	-0.235122	-0.260241	0.113803	0.0508944
48	myo-inositol	-0.0546053	-0.0521538	0.0111508	0.00498677	-0.0447272	-0.0356659	0.0263604	0.0117887	-0.0960438	-0.0992857	0.0349296	0.0174648	-0.0356322	-0.0388702	0.0513954	0.0229847	-0.0954672	-0.0807693	0.0285137	0.0127517	-0.0624314	-0.0755664	0.0587172	0.0262591	-0.0688851	-0.0700996	0.0460529	0.0205955	-0.0529287	-0.0375397	0.0500846	0.0223985	-0.063986	-0.0483662	0.0760319	0.0340025	-0.0348771	-0.0254299	0.0410416	0.0183544	-0.119734	-0.0833855	0.156896	0.0701661	-0.0127012	-0.0186739	0.0320175	0.0143187
49	ribose-5-phosphate	-0.0613544	-0.0463367	0.0671918	0.0300491	-0.150165	-0.14335	0.0912701	0.0408172	-0.0640286	-0.0979877	0.0775155	0.0387578	-0.193297	-0.224745	0.174444	0.0780137	-0.118175	-0.116061	0.050282	0.0224868	-0.03463	-0.0524514	0.15065	0.0673727	-0.212005	-0.225296	0.133757	0.0598178	-0.211321	-0.250404	0.136407	0.061003	-0.346104	-0.312551	0.132037	0.0590487	-0.210707	-0.193395	0.0861879	0.0385444	-0.25179	-0.233365	0.128669	0.0575426	-0.290936	-0.284583	0.0511475	0.0228738
50	ribulose-5-phosphate	-0.153675	-0.135565	0.0594696	0.0265956	-0.195673	-0.20149	0.0974377	0.0435754	-0.181703	-0.163953	0.072179	0.0360895	-0.188313	-0.191399	0.171604	0.0767438	-0.241213	-0.236291	0.05413	0.0242077	-0.280002	-0.3498	0.124268	0.0555744	-0.400763	-0.438049	0.080839	0.0361523	-0.349156	-0.337308	0.0981274	0.0438839	-0.439048	-0.41291	0.097162	0.0434522	-0.341417	-0.410285	0.160242	0.0716624	-0.431022	-0.428229	0.0631458	0.0282397	-0.228561	-0.262775	0.0852673	0.0381327
51	norepinephrine	-0.224276	-0.213812	0.0487108	0.0217842	-0.207329	-0.163448	0.0965233	0.0431665	-0.248429	-0.233176	0.0483078	0.0241539	-0.226654	-0.224636	0.0458625	0.0205103	-0.226464	-0.214933	0.0372063	0.0166391	-0.305533	-0.324194	0.0458827	0.0205194	-0.223975	-0.211259	0.0508939	0.0227604	-0.298007	-0.318485	0.0559449	0.0250193	-0.275613	-0.303927	0.0703493	0.0314612	-0.311603	-0.291949	0.0629003	0.0281299	-0.314474	-0.302357	0.127266	0.0569152	-0.261789	-0.255149	0.0438961	0.0196309
52	glutathione	0.056618	0.113148	0.147748	0.066075	-0.0118716	-0.0360347	0.204483	0.0914474	0.148569	0.142462	0.0535776	0.0267888	0.00118541	0.0645641	0.238063	0.106465	0.164774	0.175879	0.0287865	0.0128737	0.142736	0.161956	0.0937752	0.0419375	0.0910227	0.0964552	0.0591285	0.026443	0.0416256	0.0275576	0.0546611	0.0244452	-0.0832339	-0.120634	0.284603	0.127278	-0.0371747	0.0326869	0.193591	0.0865767	0.0137351	0.149318	0.256611	0.11476	-0.032913	-0.0383589	0.16633	0.0743851
53	tryptophan	-0.215086	-0.299576	0.155758	0.0696572	-0.331426	-0.413162	0.203798	0.0911413	-0.484451	-0.470381	0.113156	0.0565781	-0.225448	-0.237964	0.0888516	0.0397356	-0.334499	-0.321653	0.179539	0.0802923	-0.273871	-0.276423	0.140343	0.0627631	-0.264756	-0.270285	0.0426251	0.0190625	-0.245741	-0.256964	0.0943277	0.0421847	-0.106674	-0.103804	0.211269	0.0944823	-0.170592	-0.223661	0.197525	0.0883359	-0.236978	-0.271841	0.161146	0.0720665	-0.111957	-0.105368	0.158705	0.070975
54	5-hydroxyindole-3-acetic acid	-0.376834	-0.372365	0.0981268	0.0438837	-0.46962	-0.488643	0.0337512	0.015094	-0.318428	-0.317837	0.0442501	0.022125	-0.338856	-0.331978	0.0268625	0.0120133	-0.262485	-0.223123	0.0683999	0.0305894	-0.311683	-0.299456	0.0603786	0.0270021	-0.303352	-0.29894	0.056942	0.0254652	-0.394625	-0.364897	0.0809764	0.0362137	-0.291919	-0.280188	0.107256	0.0479664	-0.266122	-0.270838	0.058953	0.0263646	-0.28409	-0.255977	0.0835258	0.0373539	-0.172635	-0.153138	0.0973649	0.0435429
55	inosine	-0.363119	-0.346479	0.0909147	0.0406583	-0.581723	-0.553756	0.0800512	0.0358	-0.177077	-0.182929	0.14377	0.0718849	-0.472863	-0.545982	0.225137	0.100684	-0.373372	-0.365343	0.125992	0.0563454	-0.224841	-0.162585	0.157026	0.0702241	-0.144648	-0.183994	0.121532	0.0543509	-0.230516	-0.226839	0.0904245	0.040439	-0.362343	-0.347286	0.156557	0.0700146	-0.18095	-0.109933	0.205818	0.0920445	-0.290225	-0.333817	0.114691	0.0512914	-0.436715	-0.424568	0.0373835	0.0167184
56	adenosine	-0.354401	-0.359973	0.106886	0.0478007	-0.362724	-0.363421	0.087801	0.0392658	-0.301541	-0.27554	0.23087	0.115435	-0.463732	-0.430199	0.159742	0.0714387	-0.18521	-0.180024	0.121361	0.0542743	-0.34595	-0.336339	0.184239	0.0823942	-0.295095	-0.278721	0.114192	0.0510681	-0.15772	-0.170361	0.148565	0.0664402	-0.418688	-0.392964	0.115397	0.051607	-0.262877	-0.363286	0.164761	0.0736835	-0.391444	-0.377176	0.167425	0.0748747	-0.419155	-0.394898	0.120665	0.0539632
57	guanosine	-0.500716	-0.490582	0.122523	0.054794	-0.617343	-0.548772	0.174416	0.0780011	-0.328235	-0.344671	0.151212	0.0756059	-0.549664	-0.583797	0.148366	0.0663511	-0.309285	-0.303397	0.149336	0.0667849	-0.373356	-0.288514	0.198034	0.0885637	-0.270441	-0.233199	0.122497	0.0547823	-0.281447	-0.227268	0.124793	0.055809	-0.594417	-0.720029	0.228959	0.102394	-0.259724	-0.162288	0.154768	0.0692145	-0.409442	-0.428518	0.130291	0.0582678	-0.447397	-0.450747	0.0869331	0.0388777
58	5'-Deoxy-5'-(methylthio)adenosine	-0.35927	-0.347032	0.0778	0.0347932	-0.390001	-0.365471	0.0808951	0.0361774	-0.343065	-0.339416	0.0166348	0.00831742	-0.325271	-0.331842	0.0185526	0.00829695	-0.293662	-0.281834	0.0705734	0.0315614	-0.35391	-0.325467	0.0722103	0.0322934	-0.347205	-0.314074	0.075078	0.0335759	-0.399319	-0.395268	0.0539792	0.0241402	-0.480471	-0.498772	0.108368	0.0484636	-0.37148	-0.354211	0.0383678	0.0171586	-0.450149	-0.472472	0.12723	0.0568991	-0.311234	-0.319995	0.040886	0.0182848
59	uridine 5'-monophosphate	-0.110026	-0.114715	0.0507017	0.0226745	-0.0777783	-0.0838317	0.142232	0.0636082	-0.0933164	-0.0714002	0.0966344	0.0483172	-0.127114	-0.10886	0.103954	0.0464895	-0.083053	-0.140797	0.113419	0.0507227	-0.0464729	-0.125031	0.131814	0.0589492	-0.166558	-0.168665	0.0909526	0.0406752	-0.10616	-0.0641147	0.107798	0.0482088	-0.220929	-0.21611	0.183185	0.0819228	-0.0693718	-0.0555824	0.162132	0.0725078	-0.20877	-0.122864	0.224179	0.100256	-0.0367915	-0.0774871	0.106001	0.047405
60	inosine 5'-monophosphate	-0.275337	-0.258099	0.115008	0.051433	-0.383282	-0.316008	0.14453	0.0646356	-0.140115	-0.106723	0.0724871	0.0362435	-0.373812	-0.39623	0.142786	0.0638559	-0.311104	-0.296981	0.0639906	0.0286175	-0.393067	-0.475242	0.185208	0.0828277	-0.144681	-0.135571	0.0688915	0.0308092	-0.260753	-0.278311	0.0863655	0.0386238	-0.27337	-0.227202	0.11989	0.0536165	-0.338347	-0.292926	0.143918	0.064362	-0.231988	-0.20184	0.107092	0.047893	-0.519542	-0.522577	0.0998221	0.0446418
61	adenosine 5'-monophosphate	-0.265429	-0.236476	0.0719702	0.0321861	-0.271025	-0.219116	0.0905488	0.0404946	-0.191361	-0.191349	0.0701713	0.0350856	-0.391627	-0.436731	0.118613	0.0530453	-0.160142	-0.143881	0.0372309	0.0166502	-0.249165	-0.219152	0.138466	0.0619238	-0.267033	-0.256452	0.0626503	0.0280181	-0.327867	-0.339014	0.0815181	0.036456	-0.390941	-0.388329	0.169897	0.0759804	-0.303402	-0.284819	0.0502563	0.0224753	-0.345289	-0.339746	0.0889287	0.0397701	-0.399653	-0.387938	0.0882395	0.0394619
62	guanosine 5'-monophosphate	-0.492819	-0.441229	0.150842	0.0674586	-0.545564	-0.465762	0.130238	0.058244	-0.402838	-0.402819	0.0267263	0.0133631	-0.586491	-0.620267	0.144806	0.0647592	-0.338059	-0.329475	0.0931495	0.0416577	-0.467471	-0.391908	0.141801	0.0634154	-0.46585	-0.455638	0.123621	0.0552848	-0.539158	-0.533187	0.0551181	0.0246496	-0.638161	-0.588262	0.188018	0.0840842	-0.525383	-0.517593	0.100077	0.0447559	-0.519915	-0.474972	0.145297	0.064979	-0.587924	-0.568925	0.071946	0.0321752
63	cholesterol	-0.104564	-0.0584679	0.137641	0.0615551	-0.127643	-0.162884	0.0979628	0.0438103	-0.286824	-0.237861	0.136777	0.0683883	-0.325772	-0.281252	0.102909	0.0460222	-0.510922	-0.516221	0.24605	0.110037	-0.502704	-0.450784	0.126918	0.0567594	-0.406718	-0.446111	0.101902	0.045572	-0.300848	-0.293013	0.14119	0.063142	-0.442473	-0.41539	0.213309	0.0953945	-0.283918	-0.360163	0.135389	0.060548	-0.265327	-0.371997	0.306872	0.137237	-0.457279	-0.531373	0.234353	0.104806
64	alanine	-0.268	-0.245322	0.0705874	0.0315677	-0.293416	-0.282511	0.064008	0.0286252	-0.267822	-0.256268	0.0712999	0.03565	-0.296253	-0.315569	0.0382697	0.0171148	-0.256955	-0.268683	0.0280095	0.0125262	-0.274237	-0.262601	0.0590493	0.0264077	-0.222424	-0.185597	0.0585568	0.0261874	-0.244225	-0.214991	0.0502952	0.0224927	-0.323052	-0.314578	0.0966012	0.0432014	-0.21584	-0.200236	0.0565132	0.0252735	-0.250997	-0.252708	0.0723215	0.0323432	-0.267465	-0.282138	0.0448654	0.0200644
65	leucine	-0.277437	-0.321437	0.166164	0.0743106	-0.209052	-0.12865	0.150641	0.0673686	-0.243932	-0.22486	0.0855471	0.0427736	-0.158701	-0.238887	0.205235	0.0917839	-0.195602	-0.192308	0.052643	0.0235427	-0.211701	-0.20384	0.0914397	0.0408931	-0.249048	-0.279821	0.11101	0.0496452	-0.288324	-0.300706	0.0257053	0.0114958	-0.229635	-0.210134	0.169454	0.0757822	-0.167551	-0.240812	0.192103	0.0859109	-0.216448	-0.311042	0.181716	0.0812657	-0.240003	-0.206801	0.0675545	0.0302113
66	methionine	-0.178318	-0.183703	0.0538646	0.024089	-0.194634	-0.195998	0.037536	0.0167866	-0.160005	-0.157168	0.0742234	0.0371117	-0.145355	-0.0903207	0.111913	0.0500491	-0.223604	-0.220315	0.0512416	0.022916	-0.226834	-0.226357	0.0322658	0.0144297	-0.110268	-0.136929	0.0915014	0.0409207	-0.14883	-0.151021	0.0372262	0.016648	-0.217563	-0.225049	0.0463235	0.0207165	-0.188132	-0.191609	0.0744506	0.0332953	-0.186634	-0.173711	0.0521433	0.0233192	-0.190696	-0.162335	0.048396	0.0216433
67	aspartic acid	-0.103166	-0.0858261	0.0689909	0.0308537	-0.156039	-0.168063	0.0860231	0.0384707	-0.112487	-0.114475	0.0327824	0.0163912	-0.142736	-0.175846	0.0657731	0.0294146	-0.112502	-0.112919	0.0135463	0.00605809	-0.130463	-0.129678	0.0331088	0.0148067	-0.101945	-0.114216	0.0559904	0.0250397	-0.119135	-0.117309	0.0229441	0.0102609	-0.169774	-0.170031	0.155685	0.0696244	-0.179569	-0.162899	0.0545635	0.0244015	-0.163597	-0.125077	0.164549	0.0735884	-0.235712	-0.26466	0.0732166	0.0327435
68	glutamate	-0.0241155	-0.0114059	0.0592342	0.0264903	-0.00155548	-0.00901576	0.0459917	0.0205681	-0.0854328	-0.0767664	0.0212699	0.010635	-0.0241593	-0.0329852	0.0707482	0.0316396	-0.0554152	-0.0581167	0.0318148	0.014228	-0.094003	-0.0843143	0.0275434	0.0123178	-0.0436073	-0.0242524	0.0414919	0.0185557	-0.0338791	-0.0515194	0.062459	0.0279325	-0.0297553	-0.0176722	0.0692599	0.030974	-0.0961179	-0.110418	0.119657	0.0535122	-0.101364	-0.0804196	0.147307	0.0658779	-0.137656	-0.127986	0.0543898	0.0243238
69	dihydroxyacetone phosphate	-0.0801807	-0.0390344	0.0961718	0.0430093	-0.0347449	0.0236948	0.132363	0.0591946	-0.299859	-0.265148	0.117436	0.0587178	-0.0368279	-0.0116635	0.171854	0.0768555	-0.218407	-0.205892	0.0727765	0.0325466	-0.209918	-0.189727	0.0706386	0.0315906	-0.314091	-0.337213	0.174234	0.0779198	-0.221431	-0.197537	0.13162	0.0588623	-0.243297	-0.203592	0.139235	0.0622677	-0.220419	-0.247684	0.171607	0.0767452	-0.376935	-0.416637	0.11749	0.0525429	-0.0432635	-0.0310541	0.0999698	0.0447079
70	hypoxanthine	-0.276254	-0.253768	0.0593242	0.0265306	-0.410939	-0.398087	0.0465214	0.020805	-0.144397	-0.165186	0.106415	0.0532076	-0.33727	-0.36276	0.138282	0.0618417	-0.361662	-0.331021	0.117624	0.0526033	-0.201771	-0.134391	0.118873	0.0531616	-0.178572	-0.185053	0.0769348	0.0344063	-0.265627	-0.28066	0.0833187	0.0372612	-0.338648	-0.302702	0.0815619	0.0364756	-0.186177	-0.16157	0.160223	0.0716538	-0.292108	-0.3063	0.130955	0.0585651	-0.351577	-0.302312	0.087034	0.0389228
71	3-phosphoglycerate	-0.234068	-0.145529	0.150677	0.0673847	-0.320593	-0.318402	0.0783983	0.0350608	-0.41678	-0.4015	0.114074	0.057037	-0.272937	-0.265769	0.0649829	0.0290612	-0.208949	-0.197681	0.0659963	0.0295144	-0.172479	-0.17062	0.135916	0.0607835	-0.2891	-0.26783	0.116057	0.0519023	-0.319006	-0.309336	0.0915006	0.0409203	-0.308289	-0.294339	0.137866	0.0616554	-0.185128	-0.0934974	0.27092	0.121159	-0.375551	-0.388829	0.0800992	0.0358214	-0.154696	-0.135532	0.0599951	0.0268306

## Sheet: Thoracic (log10) Data Summary
	metabolite	Presymptomatic								Onset								Late Stage								Presymptomatic								Onset								Late Stage
		C57-NTG				C57-G93A				C57-NTG				C57-G93A				C57-NTG				C57-G93A				129S-NTG				129S-G93A				129S-NTG				129S-G93A				129S-NTG				129S-G93A
		Mean	Median	S.D.	S.E.M.	Mean	Median	S.D.	S.E.M.	Mean	Median	S.D.	S.E.M.	Mean	Median	S.D.	S.E.M.	Mean	Median	S.D.	S.E.M.	Mean	Median	S.D.	S.E.M.	Mean	Median	S.D.	S.E.M.	Mean	Median	S.D.	S.E.M.	Mean	Median	S.D.	S.E.M.	Mean	Median	S.D.	S.E.M.	Mean	Median	S.D.	S.E.M.	Mean	Median	S.D.	S.E.M.
1	lactate	0.120682	0.0879394	0.130319	0.0582805	-0.0321452	-0.0224342	0.119397	0.0533959	0.0210505	-0.0338455	0.136542	0.0610635	-0.0816855	-0.11387	0.0839022	0.0375222	-0.115622	-0.153328	0.104872	0.0469	0.0787761	0.0817651	0.0230691	0.0103168	-0.0690021	-0.0871026	0.10424	0.0466177	-0.128305	-0.0848815	0.111218	0.0497382	-0.0372318	-0.0227219	0.121331	0.0542608	0.012392	0.0402299	0.149886	0.0670312	-0.0443037	-0.00970286	0.0680717	0.0304426	0.0793204	0.0572634	0.110455	0.049397
2	alanine	0.0488406	0.0361007	0.120073	0.0536984	-0.134095	-0.130251	0.0425867	0.0190454	-0.0104971	-0.014977	0.064578	0.0288802	-0.00994267	-0.0470984	0.131667	0.0588831	-0.0205886	-0.0155063	0.0613389	0.0274316	0.0394433	0.0162078	0.0605957	0.0270992	-0.014158	-0.0459468	0.0766553	0.0342813	0.018101	0.013607	0.0762696	0.0341088	-0.0399144	0.0144235	0.121577	0.054371	0.0802787	0.0933937	0.0802171	0.0358742	0.04042	0.0385509	0.110612	0.049467	0.0326251	-0.0257643	0.106294	0.0475361
3	isoleucine	-0.00918627	-0.038971	0.157162	0.0702851	-0.137284	-0.103486	0.0658481	0.0294481	-0.0491368	-0.05052	0.0835443	0.0373622	-0.0387541	-0.00635278	0.0619081	0.0276862	-0.0741931	-0.086646	0.091458	0.0409013	-0.000149112	9.02891e-05	0.0292994	0.0131031	-0.0830565	-0.073852	0.0725553	0.0324477	-0.0230023	-0.0256229	0.0663984	0.0296943	-0.105288	-0.0771255	0.0559021	0.0250002	0.0489501	-0.000754062	0.0761605	0.03406	-0.0110039	0.0150147	0.0610973	0.0273236	-0.00108957	-0.0214078	0.0744467	0.0332936
4	but-2-yne-1,4-diol	0.00938331	-0.128479	0.255	0.114039	0.0311373	-0.0721381	0.171171	0.0765499	0.0850516	-0.067535	0.279767	0.125116	0.103148	-0.0918132	0.299091	0.133758	0.0259112	0.00747566	0.297226	0.132923	0.0952139	-0.0618721	0.26196	0.117152	0.0214288	-0.0621937	0.16648	0.0744521	-0.0722165	-0.0364031	0.203913	0.0911927	0.0660955	0.0197469	0.248043	0.110928	0.072686	-0.0308526	0.225758	0.100962	-0.00697682	-0.0921252	0.158859	0.0710439	0.015374	-0.0821106	0.264297	0.118197
5	urea	-0.0237246	0.0230331	0.13175	0.0589203	-0.0856939	-0.127524	0.0950689	0.0425161	0.0165737	-0.0238772	0.11848	0.0529859	0.0131244	0.0352092	0.157091	0.0702532	-0.0334499	-0.014757	0.081036	0.0362404	0.0247975	0.042634	0.0588592	0.0263226	-0.109651	-0.147047	0.123501	0.0552312	-0.0719251	-0.0583067	0.101045	0.0451889	-0.0828077	-0.103049	0.0606752	0.0271348	-0.0210651	-0.0245738	0.0860096	0.0384646	-0.00277261	-0.013446	0.0758486	0.0339205	-0.0309376	0.021761	0.15695	0.0701902
6	threonine	-0.0262701	-0.125071	0.346152	0.154804	-0.0703268	-0.161128	0.337412	0.150895	-0.0563169	-0.166206	0.250738	0.112133	-0.128191	-0.102278	0.202226	0.0904381	-0.087034	-0.145268	0.134033	0.0599415	-0.07123	-0.20327	0.231568	0.10356	-0.0938579	-0.102115	0.205851	0.0920594	-0.15464	-0.263513	0.187567	0.0838823	-0.0835324	-0.205052	0.310276	0.13876	-0.108968	-0.0738035	0.160804	0.0719138	-0.0954597	-0.120869	0.205816	0.0920436	-0.0397407	-0.116572	0.178624	0.0798833
7	glycine	0.168865	0.149597	0.184066	0.082317	0.0652105	0.0299379	0.229011	0.102417	0.127263	0.104953	0.118424	0.052961	-0.0401925	-0.0437209	0.104494	0.0467312	0.031237	0.0548604	0.0651671	0.0291436	-0.0265594	-0.10685	0.162943	0.0728703	-0.0412092	-0.0192692	0.121623	0.0543916	-0.0936983	-0.0669187	0.148129	0.0662455	0.0398347	0.0244194	0.180737	0.0808281	-0.0118449	-0.00325803	0.036417	0.0162862	0.0145441	0.0362761	0.0949866	0.0424793	-0.0651903	0.017554	0.219411	0.0981236
8	succinate	0.0284379	0.0371618	0.059247	0.026496	-0.065753	-0.0576813	0.062122	0.0277818	0.028394	0.0394712	0.0462573	0.0206869	-0.0581584	-0.0788337	0.125983	0.0563412	-0.0473232	-0.0697155	0.0748454	0.0334719	-0.0163029	-0.0105556	0.0932597	0.041707	-0.0586374	-0.0458702	0.109198	0.0488349	-0.0130699	0.00698089	0.0525615	0.0235062	-0.0998818	-0.111055	0.078855	0.035265	0.0181058	0.0331775	0.0582528	0.0260514	0.000387169	-0.00985217	0.0497015	0.0222272	-0.0644429	-0.0788986	0.0756684	0.0338399
9	glyceric acid	-0.431416	-0.431264	0.0914335	0.0408903	-0.459353	-0.46828	0.072618	0.0324758	-0.488224	-0.480408	0.0534254	0.0238926	-0.340301	-0.345709	0.0810187	0.0362327	-0.455296	-0.437164	0.067642	0.0302504	-0.439729	-0.440145	0.0816753	0.0365263	0.150139	0.140261	0.0403685	0.0180533	0.197484	0.187852	0.0336128	0.0150321	0.232683	0.237858	0.0503378	0.0225118	0.207077	0.22076	0.0481663	0.0215406	0.235386	0.231496	0.0346381	0.0154906	0.170428	0.167681	0.0521809	0.023336
10	porphyrin	-0.00280435	0.0214883	0.0978635	0.0437659	-0.0152258	-0.0395248	0.0471371	0.0210804	-0.00907384	0.0107099	0.105217	0.0470546	0.0253181	-0.00153828	0.0568996	0.0254463	-0.0339231	-0.0360942	0.073252	0.0327593	0.0712097	0.0638715	0.0540436	0.024169	-0.0278255	-0.00216107	0.051534	0.0230467	-0.000607801	-0.010635	0.0766728	0.0342891	0.0129697	-0.00393094	0.0503079	0.0224984	0.0885745	0.0566388	0.109313	0.0488861	0.0388682	0.0195508	0.0361305	0.0161581	0.0677167	0.0836882	0.0687942	0.0307657
11	uracil	0.000979592	-0.0118066	0.0559139	0.0250055	-0.122016	-0.0888928	0.0583364	0.0260888	-0.0232365	-0.0129443	0.0442963	0.0198099	-0.120258	-0.12946	0.0977843	0.0437305	-0.0561463	-0.0539634	0.0607584	0.027172	-0.0479516	-0.0493782	0.0619702	0.0277139	-0.0290811	-0.0417015	0.0226095	0.0101113	-0.0127812	-0.0015182	0.03262	0.0145881	-0.0181894	-0.0403413	0.0451854	0.0202075	0.0235552	0.0231868	0.0633355	0.0283245	0.0569356	0.0318741	0.078839	0.0352579	-0.0207561	-0.0142594	0.0284264	0.0127127
12	fumarate	0.0367216	0.0117511	0.0535873	0.023965	0.0294786	0.036456	0.0417426	0.0186679	0.0471974	0.0478824	0.0542911	0.0242797	0.0133027	0.0260475	0.0944737	0.0422499	-0.00585132	0.0202062	0.0949768	0.0424749	-0.0875557	-0.103923	0.113555	0.0507833	-0.121372	-0.136666	0.0520305	0.0232688	-0.0350316	-0.012583	0.0647021	0.0289357	-0.0957826	-0.0812865	0.0744436	0.0332922	-0.0253186	-0.034068	0.0264816	0.0118429	-0.0671201	-0.0642701	0.0629596	0.0281564	-0.0935634	-0.104168	0.0601699	0.0269088
13	methionine	0.232864	0.0476944	0.360026	0.161008	0.133321	-0.0552254	0.344922	0.154254	0.0615109	0.0326162	0.1712	0.0765631	-0.0172533	-0.0257343	0.0552895	0.0247262	-0.129686	-0.112873	0.0992804	0.0443995	-0.0429873	-0.0737969	0.0823673	0.0368358	-0.00534007	-0.0648878	0.130782	0.0584873	0.0386558	0.0466107	0.0795361	0.0355696	-0.0256576	-0.00961104	0.20618	0.0922064	-0.0514389	-0.0446768	0.0875506	0.0391538	0.0443414	0.0123988	0.0732373	0.0327527	0.113113	0.0170121	0.280546	0.125464
14	aspartic acid	0.0167163	0.0240043	0.0509602	0.0227901	-0.0978482	-0.122886	0.103079	0.0460982	-0.0311211	-0.0177927	0.0800203	0.0357861	-0.0652167	-0.0790339	0.0683106	0.0305494	-0.0502744	-0.0572297	0.111372	0.049807	-0.119559	-0.128277	0.0743146	0.0332345	-0.111227	-0.153796	0.0793274	0.0354763	-0.0588464	-0.0626124	0.0433662	0.019394	-0.0482316	-0.0301649	0.0796371	0.0356148	-0.0924903	-0.0619866	0.0677694	0.0303074	-0.0361661	-0.0263421	0.0527601	0.023595	-0.271386	-0.240295	0.0662065	0.0296085
15	Beta-alanine	-0.0563176	-0.0243516	0.177898	0.0795586	-0.177174	-0.187002	0.132628	0.059313	-0.0320164	0.00681234	0.126916	0.0567584	-0.0930039	-0.146164	0.307388	0.137468	-0.106331	-0.11858	0.146803	0.0656522	0.0769006	0.142993	0.299218	0.133814	-0.170528	-0.182686	0.130418	0.0583249	-0.111444	-0.148558	0.106203	0.0474955	-0.108843	-0.148083	0.138967	0.0621478	0.172154	0.100071	0.258523	0.115615	-0.0524197	-0.0353444	0.178794	0.0799591	-0.0976794	0.0250165	0.242062	0.108253
16	homoserine	0.050698	0.0746112	0.0959583	0.0429138	0.0293435	0.0406355	0.0420014	0.0187836	0.0175884	0.0128355	0.0592128	0.0264808	0.0727275	0.0626105	0.0812555	0.0363385	-0.0331041	-0.00520633	0.0746265	0.033374	0.39705	0.094996	0.744687	0.333034	0.0192353	0.0325704	0.0439333	0.0196476	0.0302671	0.0279376	0.0440569	0.0197029	0.0285975	0.0292471	0.041088	0.0183751	0.830738	0.108241	1.07553	0.480991	0.0493609	0.0470779	0.0534357	0.0238972	0.0921154	0.138199	0.0966666	0.0432306
17	decanoic acid	-0.0510157	-0.0418291	0.0948587	0.0424221	-0.0707994	-0.0696775	0.0471939	0.0211058	-0.0599311	-0.059837	0.0501221	0.0224153	-0.0394888	-0.0294095	0.052722	0.023578	-0.129888	-0.124374	0.047264	0.0211371	-0.119294	-0.112511	0.0487464	0.0218001	-0.0852057	-0.0726504	0.0413678	0.0185003	0.0054001	0.0147566	0.0361006	0.0161447	-0.000525616	-0.00896621	0.0292336	0.0130737	0.0154123	0.027888	0.0434329	0.0194238	0.00722718	0.000715352	0.0288137	0.0128859	-0.00153262	-0.0199465	0.0419314	0.0187523
18	malate	0.101995	0.118026	0.0623376	0.0278782	-0.00284957	-0.00662149	0.0410571	0.0183613	0.0301575	0.0626457	0.0704231	0.0314942	0.0144533	0.0179918	0.0881739	0.0394326	-0.00101625	0.0203221	0.0956026	0.0427548	-0.0281035	-0.0209787	0.052267	0.0233745	-0.138455	-0.108261	0.0669757	0.0299525	-0.0294525	-0.0325918	0.0237636	0.0106274	-0.134349	-0.147614	0.0558185	0.0249628	-0.0412857	-0.0387685	0.0194181	0.00868404	-0.088708	-0.101288	0.0606855	0.0271394	-0.0892227	-0.0970831	0.0604805	0.0270477
19	1-methylnicotinamide	0.211564	0.188146	0.192515	0.0860954	0.00204742	-0.0163206	0.135377	0.0605425	0.0993061	0.0741792	0.285425	0.127646	-0.02965	-0.0356001	0.195203	0.0872973	-0.0662556	-0.097861	0.120911	0.0540732	0.0769962	0.0636998	0.160478	0.0717679	-0.100102	-0.0870446	0.0798791	0.035723	-0.0917366	-0.0485386	0.120677	0.0539684	-0.0202539	-0.0406154	0.205647	0.0919682	0.00874958	0.0269298	0.092586	0.0414057	-0.0827477	-0.00245342	0.128755	0.057581	0.0155292	-0.089668	0.286528	0.128139
20	threitol	-0.0155556	-0.00582632	0.0489009	0.0218691	-0.0895444	-0.073091	0.0302911	0.0135466	0.00211078	0.00692298	0.0207053	0.00925971	-0.194752	-0.0589271	0.344382	0.154012	-0.0388093	-0.0158382	0.0666815	0.0298209	-0.0134931	-0.0147344	0.0235629	0.0105376	-0.07739	-0.0705895	0.02951	0.0131973	-0.0285007	-0.0261235	0.0266455	0.0119162	-0.0293326	-0.00746251	0.0618477	0.0276591	0.019119	0.0289345	0.0676802	0.0302675	0.00504972	-0.0115052	0.0362187	0.0161975	0.0260067	0.0610639	0.0754972	0.0337634
21	glutamate	0.0364951	0.0137891	0.054749	0.0244845	-0.0103048	-0.012112	0.0258244	0.011549	0.0256429	0.0273288	0.0537937	0.0240573	-0.00848956	-0.00806909	0.0533089	0.0238405	-0.0215989	-0.0384846	0.0501484	0.0224271	-0.0255115	-0.0115118	0.035918	0.016063	-0.0354249	-0.0304179	0.0353921	0.0158278	-0.00645264	-0.00419629	0.0156151	0.00698327	-0.00945665	0.00648026	0.0535659	0.0239554	-0.0196312	-0.018781	0.0422945	0.0189147	0.00112295	0.0094459	0.0262009	0.0117174	-0.0325694	-0.0253139	0.0365504	0.0163458
22	pyroglutamate	0.0343439	0.0135466	0.0493834	0.0220849	-0.00881067	-0.00837285	0.0257471	0.0115144	0.0247472	0.0269933	0.0504848	0.0225775	-0.00841308	-0.00812309	0.0510341	0.0228232	-0.0204368	-0.0358168	0.0495079	0.0221406	-0.0244078	-0.00842116	0.0347179	0.0155263	-0.0342509	-0.0273288	0.0350974	0.0156961	-0.0069215	-0.00383104	0.015297	0.00684103	-0.00913279	0.00634884	0.0535454	0.0239462	-0.018622	-0.016267	0.0418081	0.0186971	0.000407187	0.00892838	0.0235496	0.0105317	-0.0313646	-0.0253436	0.0350445	0.0156724
23	cytosine	0.13991	0.119516	0.145142	0.0649093	0.057957	0.0252362	0.132692	0.0593414	0.0403278	-0.00135136	0.153748	0.068758	0.0447293	0.0308046	0.0511379	0.0228696	-0.0418373	-0.0138363	0.0585411	0.0261804	0.0366336	0.0121804	0.0572568	0.025606	0.0145189	0.0212159	0.056729	0.02537	-0.0245613	-0.0183974	0.0132588	0.00592954	0.0461292	-0.020287	0.13687	0.0612102	4.11901e-05	0.00945602	0.0740451	0.033114	-0.012621	-0.0166133	0.0210743	0.00942472	0.0996995	0.0939487	0.103521	0.0462959
24	phenylalanine	-0.0264152	-0.0189149	0.076357	0.0341479	-0.0793872	-0.0920548	0.0825035	0.0368967	-0.0593833	-0.0741677	0.0563144	0.0251846	-0.0593072	-0.0366875	0.0792199	0.0354282	-0.0906689	-0.101665	0.0923278	0.0412902	-0.0905068	-0.113798	0.0702429	0.0314136	-0.220364	-0.212036	0.0967941	0.0432876	-0.191051	-0.188102	0.0648228	0.0289896	-0.251794	-0.227569	0.0735927	0.0329117	-0.131238	-0.196454	0.145837	0.0652203	-0.175839	-0.17009	0.0442809	0.019803	-0.14407	-0.165581	0.0949125	0.0424461
25	phosphoenolpyruvic acid	0.0598158	0.0569297	0.122242	0.0546683	-0.05718	-0.059716	0.0679674	0.030396	-0.0120624	-0.00789502	0.170953	0.0764526	0.007237	-0.00545703	0.0858554	0.0383957	-0.0616006	-0.13463	0.131959	0.059014	-0.0199525	-0.0422883	0.0681272	0.0304674	-0.0327754	-0.0383028	0.0547334	0.0244775	0.102433	0.0594739	0.151882	0.0679237	-0.03124	-0.0878526	0.14277	0.0638487	0.0172301	0.0228381	0.0866182	0.0387369	-0.100433	-0.13136	0.0985155	0.0440575	0.0492101	0.0568251	0.127775	0.0571428
26	3-hydroxy-3-methylglutaric acid	-0.0621804	-0.033849	0.0535496	0.0239481	-0.201784	-0.209396	0.0522082	0.0233482	-0.00424104	0.00528384	0.0426124	0.0190568	-0.268505	-0.262775	0.0746201	0.0333711	-0.0886236	-0.100184	0.103532	0.0463009	-0.259401	-0.248274	0.0806869	0.0360843	0.0204009	0.0139785	0.0405371	0.0181287	0.0856631	0.0751474	0.0314383	0.0140597	0.0951095	0.104787	0.0451689	0.0202002	0.0579324	0.0302069	0.0423718	0.0189493	0.124878	0.131049	0.0431756	0.0193087	-0.0738124	-0.0625418	0.0386784	0.0172975
27	N-acetyl-aspartic.acid	0.0524496	0.0335366	0.0763136	0.0341285	-0.0623342	-0.0682998	0.0394753	0.0176539	0.0611098	0.0896575	0.0970083	0.0433834	-0.0956108	-0.0997367	0.0921773	0.041223	-0.0085771	-0.0640479	0.0966175	0.0432087	-0.126784	-0.132567	0.101773	0.0455141	-0.0491854	-0.0448375	0.0497106	0.0222312	-0.0151617	-0.0259569	0.0398764	0.0178333	0.0275443	0.0470498	0.0576811	0.0257958	-0.0250516	-0.049968	0.0414319	0.0185289	0.0330163	0.0580235	0.0640556	0.0286465	-0.150531	-0.16211	0.0655415	0.029311
28	N-methyl-glutamic acid	0.234149	0.173186	0.165154	0.0738589	0.0880743	0.079839	0.116622	0.0521549	0.125967	0.105638	0.105673	0.0472584	0.0193212	-0.0078869	0.18582	0.0831013	0.0497972	-0.0103484	0.162574	0.0727051	0.0548186	0.0175713	0.0952505	0.0425973	-0.0687119	-0.107909	0.096784	0.0432831	0.0598163	0.0328064	0.0897601	0.0401419	0.164592	0.22682	0.123355	0.0551661	-0.0210586	-0.0112002	0.208059	0.0930469	0.107545	0.127765	0.109129	0.048804	-0.0491725	-0.075925	0.273189	0.122174
29	glycerol 2-phosphate	-0.0239307	-0.00427934	0.0437677	0.0195735	-0.038091	-0.0616352	0.0699865	0.0312989	-0.0135172	0.00326745	0.0525823	0.0235155	-0.07043	-0.0784	0.0383902	0.0171686	-0.0346892	-0.0196293	0.0462963	0.0207043	-0.0850191	-0.144111	0.100182	0.0448029	-0.0613662	-0.0759719	0.0758119	0.0339041	0.0038144	-0.00126251	0.0648075	0.0289828	-0.0557729	-0.0940935	0.0577713	0.0258361	0.0256106	0.0389439	0.0438438	0.0196075	0.0270858	0.0183069	0.0176306	0.00788464	-0.063424	-0.0784474	0.072685	0.0325057
30	trans-aconitic acid	0.136653	0.0425349	0.191493	0.0856385	-0.0130632	-0.0179137	0.0978215	0.0437471	0.0367449	0.00480023	0.171003	0.0764747	0.0409465	0.0317248	0.10463	0.0467918	-0.0147268	0.0197624	0.099026	0.0442858	-0.0558031	-0.0706895	0.043263	0.0193478	0.0884185	0.126114	0.104515	0.0467405	0.20577	0.189772	0.160281	0.0716797	0.108492	0.039275	0.164987	0.0737844	0.0850211	0.0906931	0.121638	0.054398	0.0756087	0.0694861	0.205296	0.0918114	0.14621	0.118547	0.207344	0.0927272
31	glycerol 1-phosphate	0.0436931	0.00311968	0.106439	0.0476009	-0.0646536	-0.0794044	0.0485953	0.0217325	0.00103123	0.0103419	0.0965499	0.0431784	-0.0931685	-0.0876142	0.101139	0.0452307	-0.0673305	-0.107744	0.0888025	0.0397137	-0.127764	-0.112642	0.107839	0.048227	-0.0231671	-0.0396848	0.0547282	0.0244752	-0.00662122	-0.00167817	0.0629582	0.0281557	0.0311645	0.0720156	0.0711705	0.0318284	0.00808681	0.0381537	0.0528171	0.0236205	0.031738	0.0735791	0.0805738	0.0360337	-0.0707757	-0.0679164	0.102162	0.0456884
32	O-phosphoethanolamine	0.00321995	-0.0227092	0.141027	0.0630694	-0.0668283	-0.0756636	0.0794407	0.035527	-0.0926498	-0.071685	0.129952	0.0581163	0.0106899	0.0289847	0.0622444	0.0278366	-0.211852	-0.254899	0.0877978	0.0392644	0.0243008	0.00138013	0.061609	0.0275524	-0.052658	-0.0364088	0.0419558	0.0187632	-0.0113533	0.0127616	0.0623026	0.0278626	0.00955661	0.0574186	0.105586	0.0472193	0.0209877	0.0479859	0.087215	0.0390037	-0.0479442	-0.0590532	0.0606752	0.0271348	0.039818	0.0150072	0.122442	0.0547578
33	N-acetyl-glutamic acid	0.153527	0.129935	0.146286	0.0654211	0.0152937	0.0138724	0.118234	0.0528759	0.0642973	0.0763563	0.112164	0.0501612	-0.0225314	-0.0436271	0.106675	0.0477063	0.021429	0.022278	0.0990442	0.0442939	-0.063883	-0.0179142	0.0998426	0.044651	-0.0396818	-0.0302511	0.0792806	0.0354554	-0.025875	-0.020017	0.0288057	0.0128823	-0.0303281	-0.000332182	0.0938362	0.0419648	-0.0634291	-0.0647613	0.0292935	0.0131004	-0.020102	0.00302775	0.0661012	0.0295614	-0.161153	-0.138999	0.0927472	0.0414778
34	hypoxanthine	0.310652	0.12079	0.492778	0.220377	-0.0302649	-0.159701	0.236542	0.105785	0.162383	-0.0532168	0.572149	0.255873	0.0214059	-0.178102	0.512723	0.229297	-0.226116	-0.201772	0.221926	0.0992484	0.203419	0.176982	0.141011	0.0630621	0.120941	0.0392176	0.240309	0.107469	0.165926	0.115097	0.210557	0.0941641	0.125828	-0.0289904	0.347338	0.155334	0.2951	0.217307	0.287744	0.128683	0.0472234	0.0095099	0.3517	0.157285	0.256143	0.0668763	0.459905	0.205676
35	3-phosphoglycerate	0.0684303	0.0472536	0.0877136	0.0392267	-0.0114919	-0.0339546	0.0445787	0.0199362	-0.0765291	-0.0598273	0.160199	0.0716433	0.0665326	0.0917895	0.0530119	0.0237076	-0.0380374	-0.0733117	0.0881452	0.0394197	0.0143166	0.0762247	0.0916876	0.0410039	-0.160858	-0.153735	0.0568955	0.0254444	-0.0692137	-0.0656972	0.0936929	0.0419007	-0.147903	-0.146577	0.0467793	0.0209203	0.0705639	0.108794	0.078447	0.0350825	-0.232787	-0.271713	0.156248	0.0698762	0.0454779	0.0463518	0.115944	0.0518516
36	citrate	0.0182823	0.0136982	0.0774934	0.0346561	-0.0691246	-0.065937	0.0351028	0.0156985	-0.0258497	-0.00643156	0.0626484	0.0280172	0.0538247	0.0723749	0.0849067	0.0379714	-0.0586504	-0.0430829	0.097123	0.0434347	0.0147393	0.0269223	0.0593078	0.0265232	-0.166108	-0.140883	0.0552133	0.0246921	-0.042162	-0.0333741	0.0313989	0.014042	-0.121668	-0.121195	0.045185	0.0202073	0.0253917	0.0601767	0.0679329	0.0303805	-0.0978382	-0.109154	0.0416943	0.0186463	0.0599125	0.133046	0.125271	0.056023
37	isocitrate	0.0191047	0.0202378	0.0751284	0.0335984	-0.0655718	-0.0644552	0.040234	0.0179932	-0.02506	-0.00191454	0.0633404	0.0283267	0.0560689	0.0733339	0.0859272	0.0384278	-0.0562165	-0.04566	0.0942351	0.0421432	0.0176186	0.0244861	0.0585502	0.0261844	-0.160601	-0.137248	0.0571715	0.0255679	-0.0451934	-0.0405816	0.0294819	0.0131847	-0.12266	-0.133079	0.0421885	0.0188673	0.0228617	0.0584001	0.06542	0.0292567	-0.094507	-0.0953403	0.0416322	0.0186185	0.0605223	0.130216	0.122483	0.0547761
38	dehydroascorbic acid	-0.260918	-0.215688	0.159906	0.0715123	-0.41455	-0.466501	0.144873	0.064789	-0.255466	-0.214078	0.13451	0.0601546	-0.253829	-0.241942	0.0701669	0.0313796	-0.462966	-0.47839	0.119658	0.0535125	-0.110865	-0.0942986	0.127834	0.0571689	0.0998707	0.149011	0.107991	0.0482952	0.167448	0.157862	0.0349629	0.0156359	0.0643884	0.0519216	0.119854	0.0536003	0.130362	0.14019	0.105628	0.0472382	0.142959	0.12883	0.0233722	0.0104524	0.158497	0.145447	0.110668	0.0494922
39	fructose	-0.0372246	-0.0394011	0.0450901	0.0201649	-0.0995078	-0.0919557	0.0582052	0.0260301	-0.0539483	-0.0812694	0.0787718	0.0352278	0.0473588	-0.000481529	0.113519	0.0507674	-0.071807	-0.0238573	0.0842252	0.0376667	0.0289988	0.0252339	0.0479071	0.0214247	-0.105464	-0.124152	0.0816824	0.0365295	-0.0532977	-0.0606455	0.0502314	0.0224642	-0.068615	-0.101521	0.0697472	0.0311919	0.00401914	0.00585679	0.138854	0.0620976	-0.0355866	-0.0504033	0.0835765	0.0373765	0.14612	0.104443	0.171491	0.0766933
40	lysine	0.0366747	0.00521694	0.0932716	0.0417123	-0.0277871	-0.0336778	0.0857225	0.0383363	-0.165198	-0.140103	0.109562	0.0489976	0.0795409	0.111956	0.306071	0.136879	-0.18673	-0.158128	0.110185	0.0492762	0.0614732	0.108544	0.304013	0.135959	-0.0404164	0.032543	0.1781	0.0796488	-0.0396775	-0.0138816	0.109357	0.0489058	-0.0834491	-0.0528466	0.0966751	0.0432344	0.122205	0.166588	0.146736	0.0656223	-0.0223934	0.00841397	0.115642	0.0517169	0.318229	0.210134	0.27922	0.124871
41	tyrosine	-0.00375901	-0.0222191	0.160007	0.0715572	-0.148327	-0.159577	0.0950326	0.0424999	-0.0792323	-0.0961284	0.0596887	0.0266936	0.055295	0.108148	0.14832	0.0663307	-0.128455	-0.182074	0.0938339	0.0419638	0.114248	0.169618	0.142521	0.0637371	-0.036464	-0.022307	0.0590258	0.0263971	0.0387048	0.0109392	0.0515511	0.0230543	-0.0856908	-0.0745958	0.0652732	0.029191	0.185768	0.272156	0.131283	0.0587115	-0.026277	-0.0154796	0.0339666	0.0151903	0.174322	0.188617	0.135172	0.0604507
42	ascorbic acid	-0.516908	-0.426096	0.465011	0.207959	-0.834898	-0.79597	0.307542	0.137537	-0.634448	-0.560852	0.260571	0.116531	-0.549825	-0.568493	0.576839	0.25797	-0.989522	-0.887127	0.510033	0.228094	0.106937	0.188663	0.462677	0.206915	-0.265719	-0.175533	0.301715	0.134931	-0.115961	-0.182605	0.286678	0.128206	-0.41162	-0.447226	0.416323	0.186185	0.381556	0.410348	0.35269	0.157728	-0.32472	-0.298014	0.505639	0.226129	0.0812662	0.494232	0.77313	0.345754
43	pantothenic acid	0.0455964	0.0393922	0.0533665	0.0238662	-0.0799786	-0.0616339	0.0401908	0.0179739	0.0814603	0.10666	0.0562779	0.0251683	0.0101967	0.0299225	0.0624969	0.0279495	0.0404078	0.0532268	0.104007	0.0465131	0.0154466	-0.00126378	0.0532909	0.0238324	-0.165824	-0.186529	0.0517885	0.0231605	-0.122868	-0.153456	0.0461604	0.0206436	-0.0841965	-0.0942412	0.0451815	0.0202058	-0.0873741	-0.0872752	0.070456	0.0315089	-0.0228408	-0.0240006	0.0341772	0.0152845	-0.0384937	-0.0283078	0.0767212	0.0343108
44	cytidine-5'-monophosphate	-0.0370717	-0.0676973	0.0953794	0.042655	-0.0816704	-0.107912	0.0882681	0.0394747	0.0319079	0.0412774	0.0444133	0.0198623	-0.0339971	-0.0405136	0.0742728	0.0332158	-0.0376359	-0.0444895	0.0599865	0.0268268	-0.0945366	-0.0381727	0.100178	0.0448008	-0.072567	-0.064205	0.0900313	0.0402632	-0.0246941	0.00777007	0.0621056	0.0277745	-0.0498301	-0.0381023	0.0763913	0.0341632	-0.00681261	-0.0118436	0.116048	0.0518981	0.0146363	0.0257932	0.0658925	0.029468	-0.0259915	-0.0125649	0.0650531	0.0290926
45	palmitic acid	-0.0319959	-0.0506884	0.0822306	0.0367746	0.0364442	0.0169285	0.0554292	0.0247887	0.0238103	0.0352278	0.14565	0.0651365	0.0440627	0.0470266	0.0318545	0.0142457	-0.0278214	0.026205	0.104643	0.0467978	-0.0534175	-0.0299736	0.0632312	0.0282778	-0.0938964	-0.0940671	0.0209974	0.00939032	-0.0656568	-0.0752295	0.0612408	0.0273877	-0.122739	-0.0996963	0.0338212	0.0151253	-0.0389319	-0.0534727	0.0548921	0.0245485	-0.039916	-0.017599	0.0461975	0.0206602	-0.0958151	-0.0893352	0.0206087	0.00921649
46	myo-inositol	-0.0193344	-0.0183389	0.018518	0.00828152	-0.0394348	-0.0419705	0.014258	0.00637637	-0.0204915	-0.0192578	0.0165448	0.00739908	0.017982	0.028036	0.0275276	0.0123107	-0.0435739	-0.0496744	0.0349408	0.015626	0.0236365	0.0219438	0.0202298	0.00904705	-0.0393403	-0.0376981	0.0168882	0.00755262	-0.0247941	-0.023373	0.0198355	0.0088707	-0.0268651	-0.0350463	0.0215117	0.00962033	0.0216873	0.0265824	0.0244	0.010912	-0.0228181	-0.022637	0.0144152	0.00644666	0.0534928	0.0734012	0.0497983	0.0222705
47	ribose-5-phosphate	-0.0702827	-0.0114097	0.0955219	0.0427187	-0.0181413	-0.0112614	0.0175773	0.00786082	0.0423277	0.0749881	0.103851	0.0464436	-0.0929728	-0.10345	0.0559606	0.0250263	-0.0802888	-0.0724106	0.0480979	0.02151	-0.316983	-0.26774	0.155014	0.0693244	0.00186666	-0.0227936	0.0392826	0.0175677	0.0846725	0.0849662	0.0751302	0.0335993	0.0511863	0.0587843	0.0394947	0.0176626	-0.0756619	-0.0771922	0.0393354	0.0175913	0.0816036	0.0868469	0.0442513	0.0197898	-0.066314	-0.0842501	0.0642192	0.0287197
48	norepinephrine	0.0807984	0.0285814	0.14385	0.0643318	0.0586546	0.0843521	0.107386	0.0480244	-0.0172909	0.00131614	0.125073	0.0559342	-0.0439057	-0.0454137	0.107049	0.047874	-0.106076	-0.0913422	0.109664	0.0490434	-0.0168331	-0.0229411	0.0370878	0.0165862	-0.0027939	0.023217	0.0581222	0.025993	0.00965864	0.0128864	0.0641762	0.0287005	0.0282956	0.0219569	0.0761255	0.0340444	-0.0280774	-0.00502437	0.133312	0.0596191	-0.0201633	-0.0261434	0.0674246	0.0301532	0.154701	0.12902	0.148663	0.0664842
49	5-hydroxyindole-3-acetic acid	-0.0312777	-0.0282855	0.0748036	0.0334532	-0.207569	-0.207364	0.0621242	0.0277828	-0.0295685	0.00224332	0.0828633	0.0370576	-0.0974995	-0.102862	0.105197	0.0470457	-0.0633658	-0.114852	0.141333	0.063206	-0.0380545	-0.0339327	0.0831439	0.0371831	-0.0954887	-0.112649	0.0661216	0.0295705	-0.0336556	-0.0369126	0.0633963	0.0283517	0.0535392	0.103762	0.0957829	0.0428354	0.0490837	0.0878786	0.0945265	0.0422735	0.0592804	0.0492381	0.0692976	0.0309908	0.096108	0.122244	0.164656	0.0736365
50	oleic acid	-0.0595517	-0.0503599	0.148928	0.0666026	0.0587518	0.0569765	0.123345	0.0551614	0.00631277	0.0566794	0.222376	0.0994494	0.0680296	0.0448949	0.0639875	0.0286161	0.11873	0.129191	0.171196	0.0765612	-0.0776178	-0.0691923	0.100906	0.0451267	-0.0787865	-0.0244226	0.115512	0.0516587	-0.0527286	-0.052545	0.0526673	0.0235535	-0.137911	-0.103993	0.054638	0.0244349	-0.0123868	-0.0220768	0.0440421	0.0196962	-0.0149515	-0.0192514	0.0621478	0.0277933	-0.118393	-0.0618344	0.109193	0.0488327
51	stearic acid	-0.0235797	-0.0501173	0.090276	0.0403727	-0.00277954	-0.00291677	0.0432717	0.0193517	0.0265014	-0.0123794	0.152941	0.0683975	0.0257606	0.025406	0.0433229	0.0193746	-0.0299633	-0.0110889	0.0640916	0.0286627	-0.0420306	-0.0449037	0.0430077	0.0192336	-0.0548556	-0.0703258	0.0298517	0.0133501	-0.0769619	-0.102162	0.0633329	0.0283234	-0.100194	-0.0959296	0.023118	0.0103387	-0.0432068	-0.062499	0.0517321	0.0231353	-0.057792	-0.0423726	0.0506391	0.0226465	-0.0990712	-0.101281	0.0186195	0.00832692
52	glucose 6-phosphate	-0.0126707	0.129317	0.324294	0.145029	0.248558	0.231425	0.178019	0.0796126	-0.0024989	0.0101636	0.240222	0.10743	0.451018	0.514008	0.254235	0.113697	-0.156017	-0.223729	0.202398	0.090515	0.177681	0.0511321	0.30055	0.13441	-0.403967	-0.463799	0.342196	0.153035	-0.228692	-0.200786	0.284599	0.127276	-0.200895	-0.191217	0.133236	0.0595849	-0.0121003	-0.0258543	0.0757757	0.0338879	-0.26972	-0.344073	0.312982	0.13997	0.0754005	0.0632505	0.192452	0.086067
53	inosine	0.0272185	-0.0110901	0.133652	0.0597712	-0.68958	-0.422086	0.521423	0.233188	-0.0740647	-0.0637929	0.161576	0.0722591	-0.184826	-0.251458	0.349128	0.156135	-0.237782	-0.276939	0.234406	0.10483	0.020833	0.0720648	0.155201	0.069408	0.00290025	-0.050817	0.0934801	0.0418056	0.0900774	0.107466	0.123583	0.0552682	-0.0481075	-0.0696598	0.0560842	0.0250816	0.171034	0.146712	0.152628	0.0682574	0.0441875	0.0380924	0.231313	0.103446	-0.205055	-0.0213668	0.440037	0.196791
54	adenosine	0.0834488	0.0806043	0.194948	0.0871836	-0.212803	-0.146146	0.138941	0.0621361	0.161466	0.0883186	0.241594	0.108044	-0.096611	-0.267387	0.34848	0.155845	-0.118833	-0.0794579	0.270864	0.121134	-0.0172357	-0.0169445	0.158695	0.0709707	-0.101868	-0.0595207	0.189586	0.0847855	0.134298	0.184056	0.128446	0.0574427	-0.0201171	0.0434346	0.221828	0.0992044	0.194764	0.213418	0.194018	0.0867675	0.0472036	0.0794372	0.175389	0.0784365	0.0283185	-0.0119383	0.14592	0.0652573
55	sucrose	-0.189989	-0.20288	0.0801959	0.0358647	-0.26049	-0.288681	0.0868855	0.0388564	-0.117303	-0.203123	0.250637	0.112088	0.110911	0.110614	0.188813	0.0844396	-0.0016001	-0.109562	0.336793	0.150618	-0.177931	-0.261411	0.154562	0.0691222	0.0791865	-0.143518	0.48549	0.217118	-0.10991	-0.188273	0.295378	0.132097	-0.138266	-0.124102	0.109992	0.04919	-0.156354	-0.245712	0.226483	0.101286	-0.124171	-0.0846422	0.14029	0.0627395	-0.277091	-0.299392	0.143246	0.0640616
56	5'-Deoxy-5'-(methylthio)adenosine	-0.0111334	-0.0519518	0.226338	0.101221	-0.00677742	-0.015076	0.0705042	0.0315304	-0.0433451	-0.0797224	0.146826	0.0656624	0.0503995	0.0146411	0.100055	0.0447458	-0.105763	-0.117271	0.0388703	0.0173833	-0.0256691	-0.0157449	0.169901	0.075982	0.010572	0.000437789	0.0536783	0.0240056	-0.00420906	0.0126072	0.0661533	0.0295847	-0.0472808	-0.0233564	0.117844	0.0527013	-0.0293227	-0.0322524	0.128097	0.0572865	-0.10164	-0.131438	0.0850092	0.0380173	-0.0253936	-0.0464522	0.24111	0.107828
57	guanosine	0.0565081	-0.0251564	0.157413	0.0703974	0.00377865	-0.0750893	0.173521	0.0776009	-0.0970468	-0.0284523	0.291173	0.130217	0.0622161	-0.0340561	0.260429	0.116468	-0.308552	-0.197044	0.36623	0.163783	-0.0643462	-0.0168279	0.229349	0.102568	-0.0125495	0.0395308	0.26802	0.119862	0.115516	0.0727296	0.112964	0.0505192	0.0194379	-0.0630396	0.235882	0.10549	0.0835872	0.0786657	0.111616	0.0499162	0.0383355	0.00507907	0.145958	0.0652743	-0.0282913	-0.052337	0.135404	0.0605544
58	cholesterol	-0.0695348	-0.0750432	0.30952	0.138422	-0.0870197	-0.101278	0.322546	0.144247	-0.175021	-0.062871	0.362662	0.162187	0.19402	0.104649	0.217108	0.0970934	0.0118177	-0.170174	0.533301	0.238499	-0.254219	-0.295233	0.140849	0.0629897	-0.215774	-0.248765	0.189119	0.0845768	-0.124529	-0.126706	0.184394	0.0824636	-0.0564571	-0.170683	0.217786	0.0973969	-0.316576	-0.30063	0.128025	0.0572544	-0.108284	0.019136	0.222773	0.0996271	-0.372057	-0.386274	0.331307	0.148165
